# Supplementary material for: The solubility product extends the buffering concept to heterotypic biomolecular condensates
Source: eLife. 2021 Jul 8;10:e67176. doi: 10.7554/eLife.67176 (PMC8289413; doi:10.7554/eLife.67176)
Supplement: Figure 1—source data 1. [file elife-67176-fig1-data1.xlsx]

## Sheet: 1A
Total conc (uM)	Free A4 (uM)	Free B4 (uM)
10	6.74	6.74
20	9.92	9.93
30	11.54	11.54
40	12.39	12.38
50	12.8	12.83
60	12.96	12.97
70	13.03	13.02
80	13.06	13.04
90	13.02	13
100	13.02	13

## Sheet: 1B
Molecules = 80			Molecules = 200			Molecules = 400			Molecules = 800
Cluster size	foTM		Cluster size	foTM		Cluster size	foTM		Cluster size	foTM
1	0.309312		1	0.30755		1	0.31135		1	0.311825
2	0.18325		2	0.1771		2	0.177425		2	0.1774
3	0.114375		3	0.1146		3	0.112612		3	0.112219
4	0.081		4	0.0785		4	0.0758		4	0.07795
5	0.0571875		5	0.057875		5	0.0588125		5	0.0550312
6	0.049875		6	0.0453		6	0.0432		6	0.045825
7	0.035875		7	0.0343		7	0.0370125		7	0.0329
8	0.032		8	0.0264		8	0.0289		8	0.02555
9	0.0241875		9	0.02025		9	0.0228375		9	0.0217125
10	0.01625		10	0.01775		10	0.017625		10	0.018875
11	0.0199375		11	0.01705		11	0.0141625		11	0.0142313
12	0.01725		12	0.0135		12	0.0132		12	0.01335
13	0.00975		13	0.014625		13	0.0115375		13	0.0105625
14	0.00875		14	0.01085		14	0.010325		14	0.0093625
15	0.005625		15	0.00825		15	0.008625		15	0.0084375
16	0.005		16	0.0052		16	0.0058		16	0.0065
17	0.00425		17	0.007225		17	0.0053125		17	0.00626875
18	0.00225		18	0.00675		18	0.00585		18	0.0059625
19	0.0095		19	0.0057		19	0.0030875		19	0.005225
21	0.00525		20	0.0035		20	0.003		20	0.004375
23	0.0043125		21	0.0042		21	0.004725		21	0.00275625
24	0.0015		22	0.00165		22	0.004125		22	0.0028875
25	0.0015625		23	0.001725		23	0.0025875		23	0.00330625
28	0.00175		24	0.0006		24	0.0039		24	0.0024
			25	0.001875		25	0.00125		25	0.0021875
			26	0.0026		26	0.002275		26	0.0017875
			27	0.003375		27	0.0010125		27	0.0010125
			28	0.0014		28	0.00105		28	0.001225
			29	0.003625		29	0.000725		29	0.00126875
			31	0.000775		30	0.001125		30	0.0013125
			33	0.000825		31	0.0003875		31	0.00058125
			35	0.000875		32	0.0012		32	0.001
			37	0.000925		33	0.0004125		33	0.00103125
			41	0.001025		35	0.00175		34	0.0010625
			45	0.00225		36	0.0018		35	0.00175
						38	0.00095		36	0.0009
						39	0.0004875		37	0.00069375
						42	0.00105		38	0.0011875
						44	0.00055		39	0.00170625
						48	0.0006		40	0.0005
						58	0.000725		41	0.00076875
						67	0.0008375		42	0.000525
									45	0.0005625
									46	0.000575
									49	0.0006125
									53	0.0006625
									54	0.0003375
									55	0.00034375
									56	0.00035
									61	0.00114375

## Sheet: 1C
Total molecules = 160			Total molecules = 400			Total molecules = 800			Total molecules = 1600
Cluster size	foTM		Cluster size	foTM		Cluster size	foTM		Cluster size	foTM
1	0.164469		1	0.162038		1	0.163644		1	0.162994
2	0.101688		2	0.1021		2	0.0992625		2	0.0979125
3	0.0681563		3	0.0667875		3	0.0644625		3	0.0650062
4	0.050125		4	0.05215		4	0.04585		4	0.0480875
5	0.0409375		5	0.0386875		5	0.0373438		5	0.0342969
6	0.0365625		6	0.030675		6	0.029775		6	0.0289125
7	0.0321562		7	0.025725		7	0.0247625		7	0.0235812
8	0.025		8	0.0222		8	0.02065		8	0.020725
9	0.0196875		9	0.0169875		9	0.0183375		9	0.0170156
10	0.0196875		10	0.0185		10	0.0165625		10	0.0154375
11	0.0134062		11	0.01705		11	0.0133375		11	0.013475
12	0.015375		12	0.01335		12	0.010575		12	0.0122625
13	0.011375		13	0.013325		13	0.0108875		13	0.00922187
14	0.013125		14	0.011725		14	0.0114625		14	0.0101063
15	0.0103125		15	0.0080625		15	0.0105		15	0.00885937
16	0.0145		16	0.008		16	0.0085		16	0.0089
17	0.00903125		17	0.0087125		17	0.00881875		17	0.00834062
18	0.0140625		18	0.0072		18	0.00765		18	0.0070875
19	0.00771875		19	0.008075		19	0.0049875		19	0.00718437
20	0.00875		20	0.00775		20	0.006125		20	0.0058125
21	0.0039375		21	0.0049875		21	0.00511875		21	0.00689062
22	0.009625		22	0.0088		22	0.005225		22	0.005225
23	0.008625		23	0.0083375		23	0.00474375		23	0.00503125
24	0.00675		24	0.0081		24	0.0039		24	0.00375
25	0.00546875		25	0.0075		25	0.0046875		25	0.00296875
26	0.0089375		26	0.006825		26	0.002925		26	0.0052
27	0.00590625		27	0.00405		27	0.00421875		27	0.00362812
28	0.00525		28	0.00525		28	0.00525		28	0.003675
29	0.00453125		29	0.0047125		29	0.0054375		29	0.00380625
30	0.0084375		30	0.004125		30	0.004125		30	0.002625
31	0.00484375		31	0.003875		31	0.00329375		31	0.00300312
32	0.005		32	0.0052		32	0.0034		32	0.0031
33	0.0061875		33	0.0066		33	0.00309375		33	0.00299062
34	0.0053125		34	0.005525		34	0.002975		34	0.00371875
35	0.0065625		35	0.00525		35	0.00240625		35	0.00229687
36	0.007875		36	0.0027		36	0.001575		36	0.0027
37	0.0069375		37	0.004625		37	0.00300625		37	0.00173438
38	0.007125		38	0.001425		38	0.001425		38	0.00285
39	0.0073125		39	0.00585		39	0.00195		39	0.002925
40	0.005		40	0.004		40	0.0035		40	0.00175
41	0.00896875		41	0.0041		41	0.00205		41	0.00281875
42	0.007875		42	0.00105		42	0.0034125		42	0.00275625
43	0.00134375		43	0.0048375		43	0.00134375		43	0.00255312
44	0.00825		44	0.0055		44	0.0022		44	0.0020625
45	0.005625		45	0.0061875		45	0.00225		45	0.00323437
46	0.002875		46	0.00115		46	0.0025875		46	0.00186875
47	0.00146875		47	0.0029375		47	0.003525		47	0.00235
48	0.003		48	0.003		48	0.0024		48	0.0021
49	0.006125		49	0.0030625		49	0.00153125		49	0.00275625
50	0.0046875		50	0.0025		50	0.0025		50	0.00125
51	0.0095625		51	0.00255		51	0.0019125		51	0.00223125
52	0.00325		52	0.0039		52	0.00195		52	0.0026
53	0.0033125		53	0.0033125		53	0.00099375		53	0.00298125
55	0.006875		54	0.002025		54	0.0027		54	0.0016875
56	0.007		55	0.0034375		55	0.0020625		55	0.00154687
59	0.00184375		56	0.007		56	0.00245		56	0.00175
60	0.00375		57	0.0021375		57	0.001425		57	0.00195938
61	0.007625		58	0.002175		58	0.002175		58	0.00054375
62	0.00775		59	0.0036875		59	0.001475		59	0.00110625
63	0.00590625		60	0.00525		60	0.001125		60	0.0015
64	0.002		61	0.0007625		61	0.00114375		61	0.00114375
65	0.0040625		62	0.000775		62	0.0042625		62	0.00174375
66	0.004125		63	0.001575		63	0.001575		63	0.00177188
67	0.00209375		64	0.004		64	0.0008		64	0.0012
68	0.00425		65	0.0024375		65	0.00121875		65	0.001625
69	0.008625		66	0.0033		66	0.0028875		66	0.00226875
72	0.00675		67	0.001675		67	0.0025125		67	0.001675
73	0.0045625		68	0.0051		68	0.00085		68	0.001275
74	0.0023125		69	0.0043125		69	0.0008625		69	0.00150937
75	0.0046875		70	0.0035		70	0.0004375		70	0.00196875
76	0.002375		71	0.001775		71	0.00133125		71	0.001775
78	0.00975		73	0.001825		73	0.00136875		72	0.001575
79	0.0049375		74	0.002775		74	0.0032375		73	0.00045625
80	0.0025		75	0.001875		75	0.00234375		74	0.00069375
81	0.00253125		76	0.00285		76	0.00095		75	0.00164062
82	0.0076875		77	0.0009625		77	0.0009625		76	0.0016625
84	0.002625		78	0.000975		78	0.000975		77	0.0009625
86	0.005375		79	0.00395		79	0.00148125		78	0.000975
91	0.00284375		80	0.002		80	0.001		79	0.00049375
98	0.0030625		81	0.0010125		81	0.00253125		80	0.001
			82	0.001025		82	0.0015375		81	0.0010125
			83	0.002075		83	0.0010375		82	0.00128125
			85	0.002125		84	0.001575		83	0.0010375
			86	0.001075		85	0.00265625		84	0.001575
			87	0.002175		86	0.00215		85	0.00132813
			88	0.0022		87	0.0010875		86	0.0016125
			89	0.0011125		88	0.00165		87	0.00054375
			90	0.00225		89	0.00055625		88	0.000825
			92	0.00345		90	0.00225		89	0.00055625
			93	0.002325		91	0.00170625		90	0.0005625
			95	0.0011875		92	0.0023		91	0.00056875
			96	0.0024		93	0.00290625		92	0.0008625
			97	0.0036375		94	0.0005875		93	0.000871875
			98	0.001225		95	0.00178125		94	0.0005875
			99	0.0037125		97	0.00303125		95	0.000296875
			100	0.0025		98	0.00245		96	0.0009
			102	0.001275		99	0.00185625		97	0.00060625
			103	0.002575		100	0.001875		99	0.000309375
			106	0.003975		101	0.0012625		100	0.0009375
			107	0.0013375		102	0.0006375		101	0.0012625
			108	0.00135		103	0.0012875		103	0.00064375
			109	0.0040875		104	0.0026		104	0.001625
			110	0.001375		105	0.00065625		105	0.000984375
			112	0.0014		106	0.001325		106	0.0006625
			113	0.0014125		107	0.00200625		108	0.0003375
			114	0.00285		108	0.002025		109	0.00102187
			115	0.0014375		109	0.00204375		110	0.0006875
			116	0.0029		110	0.0006875		111	0.0013875
			117	0.0014625		111	0.00346875		113	0.00070625
			118	0.001475		112	0.0007		114	0.00035625
			121	0.0015125		113	0.0014125		115	0.0014375
			122	0.00305		114	0.0007125		116	0.00145
			125	0.0015625		115	0.00071875		117	0.0014625
			126	0.001575		120	0.00075		118	0.001475
			127	0.0079375		121	0.00075625		119	0.00111563
			131	0.0016375		123	0.00076875		120	0.001125
			132	0.0033		124	0.000775		121	0.00075625
			134	0.001675		125	0.00078125		122	0.0007625
			139	0.003475		126	0.0007875		123	0.00076875
			140	0.0035		127	0.00079375		124	0.0011625
			142	0.001775		128	0.0008		127	0.000396875
			144	0.0018		129	0.0016125		128	0.0008
			145	0.0018125		130	0.0024375		130	0.00040625
			148	0.00185		131	0.00245625		131	0.00122813
			151	0.0018875		132	0.00165		132	0.0012375
			153	0.0019125		133	0.00083125		133	0.00124687
			154	0.001925		135	0.0016875		134	0.0008375
			156	0.00195		137	0.00085625		135	0.00126563
			159	0.0019875		138	0.0008625		136	0.000425
			162	0.002025		139	0.00086875		137	0.00085625
			163	0.0020375		140	0.000875		138	0.00043125
			165	0.004125		141	0.00088125		140	0.000875
			166	0.002075		142	0.001775		141	0.000440625
			169	0.0021125		143	0.00089375		142	0.00133125
			173	0.0021625		144	0.0009		143	0.000446875
			174	0.002175		145	0.0018125		145	0.00090625
			180	0.0045		147	0.00091875		146	0.00045625
			181	0.0022625		149	0.00093125		149	0.00093125
			235	0.0029375		151	0.00094375		150	0.00140625
						153	0.00095625		151	0.00094375
						155	0.00096875		153	0.000478125
						156	0.00195		154	0.0009625
						157	0.00294375		155	0.00096875
						158	0.0009875		157	0.00147187
						159	0.0019875		158	0.001975
						160	0.003		160	0.001
						161	0.0020125		161	0.000503125
						162	0.0010125		163	0.00101875
						165	0.00103125		164	0.0015375
						172	0.00215		165	0.00103125
						173	0.00324375		167	0.000521875
						175	0.0021875		168	0.000525
						176	0.0011		169	0.00158437
						177	0.00331875		170	0.0010625
						179	0.00111875		172	0.0005375
						180	0.001125		174	0.00054375
						181	0.00339375		175	0.000546875
						183	0.00114375		177	0.000553125
						184	0.00115		178	0.00055625
						187	0.00116875		179	0.000559375
						188	0.001175		180	0.00225
						192	0.0036		181	0.000565625
						194	0.0012125		182	0.0011375
						196	0.001225		183	0.000571875
						198	0.0012375		184	0.000575
						199	0.00124375		185	0.00115625
						200	0.00125		186	0.00058125
						203	0.00126875		187	0.00116875
						206	0.0012875		188	0.001175
						209	0.0026125		190	0.00059375
						210	0.002625		192	0.0006
						212	0.001325		193	0.000603125
						215	0.00134375		194	0.00060625
						217	0.00135625		195	0.000609375
						220	0.004125		196	0.0006125
						226	0.0014125		198	0.00185625
						227	0.00141875		199	0.00186563
						228	0.001425		200	0.000625
						229	0.00143125		201	0.000628125
						230	0.0014375		203	0.000634375
						231	0.0028875		205	0.00128125
						232	0.00145		211	0.00131875
						234	0.0014625		212	0.0006625
						235	0.00146875		215	0.000671875
						240	0.0015		220	0.0006875
						241	0.00150625		223	0.00139375
						243	0.00151875		224	0.0007
						245	0.00153125		225	0.000703125
						248	0.00155		227	0.000709375
						249	0.00155625		229	0.00214687
						250	0.0015625		230	0.0014375
						251	0.00156875		232	0.00145
						256	0.0032		234	0.00073125
						259	0.00161875		235	0.00220312
						260	0.001625		236	0.0007375
						262	0.0016375		237	0.00222187
						263	0.00164375		238	0.0014875
						265	0.00165625		239	0.00224062
						271	0.00169375		240	0.0015
						272	0.0017		243	0.000759375
						275	0.00171875		250	0.00078125
						283	0.00176875		251	0.000784375
						289	0.00180625		252	0.001575
						290	0.0018125		256	0.0008
						293	0.00183125		257	0.000803125
						294	0.0018375		263	0.00246562
						296	0.00185		265	0.000828125
						297	0.00185625		267	0.000834375
						298	0.0018625		268	0.0008375
						301	0.00188125		271	0.000846875
						302	0.003775		272	0.00085
						304	0.0038		273	0.000853125
						305	0.00190625		274	0.00085625
						306	0.0019125		276	0.0008625
						316	0.001975		278	0.00086875
						319	0.00199375		283	0.00176875
						329	0.00205625		284	0.0008875
						333	0.00208125		286	0.00089375
						336	0.0021		288	0.0009
						338	0.0021125		298	0.00093125
						358	0.0022375		300	0.0009375
						361	0.00225625		304	0.00095
						444	0.002775		306	0.0019125
									311	0.000971875
									312	0.000975
									313	0.000978125
									314	0.00098125
									315	0.000984375
									316	0.0009875
									319	0.00199375
									323	0.00100938
									324	0.0010125
									329	0.00205625
									330	0.00309375
									331	0.00103437
									332	0.0010375
									333	0.00104063
									336	0.00105
									337	0.00105313
									339	0.00105937
									341	0.00106562
									342	0.00106875
									343	0.00107187
									345	0.00107813
									347	0.00108438
									350	0.00109375
									356	0.0011125
									359	0.00112188
									361	0.00338437
									364	0.0011375
									368	0.00115
									371	0.00115938
									374	0.00116875
									375	0.00117187
									378	0.00118125
									380	0.0011875
									382	0.00119375
									383	0.00119688
									385	0.00120312
									386	0.00120625
									393	0.00122813
									394	0.00123125
									395	0.00246875
									406	0.00126875
									407	0.00254375
									408	0.001275
									411	0.00128437
									414	0.00129375
									418	0.00391875
									424	0.001325
									426	0.00133125
									427	0.00133438
									428	0.0040125
									431	0.00134687
									432	0.00135
									448	0.0014
									452	0.0014125
									453	0.00141562
									455	0.00142187
									457	0.00142812
									460	0.0014375
									463	0.00289375
									483	0.00150938
									502	0.00156875
									504	0.001575
									506	0.00158125
									518	0.00161875
									520	0.00325
									539	0.00168438
									545	0.00170312
									547	0.00170937
									557	0.00174062
									561	0.00175312
									581	0.00181562
									585	0.00182813
									588	0.0018375
									623	0.00194688
									629	0.00196562
									645	0.00201563
