# Supplementary material for: The solubility product extends the buffering concept to heterotypic biomolecular condensates
Source: eLife. 2021 Jul 8;10:e67176. doi: 10.7554/eLife.67176 (PMC8289413; doi:10.7554/eLife.67176)
Supplement: Figure 2—source data 1. [file elife-67176-fig2-data1.xlsx]

## Sheet: 2B
	CMC = 12.9 uM				CMC = 13 uM				CMC = 13.1 uM
Time (s)	Total A4 (uM)	Total B4 (uM)		Time (s)	Total A4 (uM)	Total B4 (uM)		Time (s)	Total_SH3 (uM)	Total_PRM (uM)
0	0.1	0.1		0	0.1	0.1		0	0.1	0.1
0.05	31.396	31.619		0.05	31.996	31.853		0.05	32.865	32.613
0.1	39.341	39.473		0.1	39.88	39.758		0.1	41.015	40.752
0.15	43.85	43.731		0.15	44.648	44.197		0.15	45.644	45.577
0.2	46.392	46.367		0.2	47.94	47.983		0.2	49.206	48.91
0.25	47.936	48.112		0.25	49.975	49.482		0.25	51.677	51.625
0.3	49.258	49.275		0.3	51.716	51.552		0.3	54.203	54.388
0.35	51.01	51.137		0.35	53.117	53.074		0.35	56.615	56.235
0.4	51.672	51.811		0.4	54.648	54.478		0.4	59.372	59.172
0.45	53.074	52.87		0.45	55.88	55.863		0.45	60.766	60.59
0.5	53.418	53.614		0.5	56.673	56.876		0.5	61.822	61.913
0.55	53.554	53.52		0.55	57.71	57.429		0.55	63.489	63.37
0.6	54.038	53.975		0.6	58.449	58.533		0.6	63.898	63.627
0.65	53.966	54		0.65	58.968	59.09		0.65	65.956	66.042
0.7	54.574	54.331		0.7	59.115	59.291		0.7	67.19	67.24
0.75	54.591	54.661		0.75	59.49	59.707		0.75	67.959	68.017
0.8	54.899	54.635		0.8	60.736	60.6		0.8	69.763	69.65
0.85	54.796	55.014		0.85	61.948	62.121		0.85	71.337	71.045
0.9	54.65	54.533		0.9	62.419	62.537		0.9	72.219	72.32
0.95	54.589	54.923		0.95	62.466	62.41		0.95	73.183	73.324
1	54.855	54.555		1	62.298	62.568		1	75.03	74.731
1.05	54.013	53.954		1.05	62.596	62.831		1.05	76.228	76.387
1.1	53.865	53.998		1.1	63.208	63.147		1.1	78.081	77.719
1.15	53.751	53.855		1.15	63.806	63.742		1.15	79.542	79.642
1.2	54.079	54.379		1.2	64.289	64.216		1.2	80.979	81.079
1.25	54.699	55.001		1.25	64.081	64.318		1.25	82.961	83.232
1.3	54.516	54.902		1.3	63.679	63.906		1.3	84.057	84.236
1.35	54.866	54.826		1.35	64.29	64.518		1.35	85.072	84.663
1.4	54.915	54.955		1.4	65.233	65.186		1.4	85.332	85.262
1.45	54.543	54.685		1.45	64.703	64.604		1.45	86.522	86.244
1.5	54.863	54.859		1.5	64.586	65.074		1.5	87.252	87.474
1.55	55.927	55.706		1.55	65.3	65.277		1.55	88.422	88.425
1.6	55.903	56.139		1.6	65.625	65.335		1.6	89.659	89.548
1.65	56.436	56.309		1.65	65.753	65.876		1.65	90.487	90.568
1.7	57.128	57.18		1.7	66.005	65.881		1.7	92.428	92.355
1.75	56.958	56.84		1.75	66.267	65.925		1.75	93.673	93.709
1.8	57.259	56.979		1.8	66.962	66.727		1.8	94.839	94.687
1.85	57.353	57.218		1.85	67.491	67.165		1.85	96.467	96.669
1.9	57.619	57.764		1.9	67.652	67.568		1.9	97.099	97.09
1.95	57.59	57.978		1.95	67.595	67.579		1.95	98.294	98.07
2	57.469	57.321		2	68.356	68.204		2	99.854	99.927
2.05	57.209	57.045		2.05	68.802	68.841		2.05	101.232	101.234
2.1	56.893	56.699		2.1	69.282	69.332		2.1	102.675	102.575
2.15	56.788	56.987		2.15	69.53	69.588		2.15	103.807	103.959
2.2	56.64	56.721		2.2	70.083	70.181		2.2	105.138	105.028
2.25	56.455	56.57		2.25	70.941	71.204		2.25	107	106.996
2.3	57.024	57.005		2.3	70.943	70.902		2.3	109.334	109.27
2.35	56.446	56.922		2.35	70.697	70.883		2.35	110.25	110.078
2.4	57.212	57.012		2.4	70.826	70.728		2.4	112.133	112.056
2.45	57.24	57.144		2.45	70.981	71.008		2.45	113.834	113.75
2.5	57.463	57.579		2.5	71.219	71.028		2.5	115.915	116.362
2.55	57.164	57.327		2.55	71.179	71.16		2.55	119.011	118.977
2.6	56.785	56.688		2.6	71.014	71.291		2.6	121.973	122.333
2.65	56.37	56.453		2.65	71.111	71.154		2.65	124.473	124.641
2.7	56.264	56.307		2.7	71.147	71.634		2.7	126.319	126.707
2.75	56.338	56.326		2.75	70.746	70.702		2.75	129.23	129.103
2.8	56.629	56.323		2.8	71.03	71.196		2.8	131.413	131.395
2.85	56.771	56.42		2.85	71.317	71.455		2.85	134.448	134.566
2.9	56.911	56.901		2.9	71.697	71.652		2.9	136.094	135.916
2.95	56.909	56.886		2.95	71.588	71.657		2.95	138.158	138.365
3	56.353	56.429		3	72.063	71.645		3	139.854	139.693
3.05	55.974	55.994		3.05	71.692	71.898		3.05	142.011	142.343
3.1	55.889	55.807		3.1	71.507	71.512		3.1	144.322	144.373
3.15	55.579	55.231		3.15	71.482	71.343		3.15	146.337	146.69
3.2	55.231	55.407		3.2	71.54	71.668		3.2	149.166	148.723
3.25	55.024	55.554		3.25	71.506	71.586		3.25	151.241	151.399
3.3	55.895	55.832		3.3	72.497	72.052		3.3	154.927	154.44
3.35	55.815	55.951		3.35	72.684	72.703		3.35	157.28	157.241
3.4	56.618	56.368		3.4	73.111	73.169		3.4	159.673	159.126
3.45	55.607	55.906		3.45	73.248	72.955		3.45	163.695	163.388
3.5	55.668	55.625		3.5	73.572	73.756		3.5	166.188	166.389
3.55	55.6	55.623		3.55	73.461	73.377		3.55	169.698	169.872
3.6	55.374	55.387		3.6	73.285	73.293		3.6	173.456	173.41
3.65	54.734	54.77		3.65	73.174	73.094		3.65	176.355	176.364
3.7	54.431	54.404		3.7	73.483	73.363		3.7	177.995	178.266
3.75	54.336	54.418		3.75	72.662	72.789		3.75	181.605	181.383
3.8	54.659	54.193		3.8	72.821	72.706		3.8	184.777	185.274
3.85	53.983	54.274		3.85	72.613	72.916		3.85	187.742	187.767
3.9	54.354	54.655		3.9	73.717	73.676		3.9	191.379	191.1
3.95	55.317	55.132		3.95	73.247	73.498		3.95	194.608	194.696
4	55.595	55.737		4	73.366	73.223		4	198.062	198.068
4.05	56.29	56.318		4.05	73.466	73.526		4.05	201.443	201.678
4.1	56.214	56.034		4.1	73.416	73.303		4.1	204.767	205.046
4.15	55.554	55.619		4.15	72.218	72.133		4.15	207.33	207.019
4.2	55.423	55.44		4.2	72.685	72.191		4.2	209.951	209.677
4.25	55.821	55.641		4.25	72.936	72.997		4.25	212.638	213.425
4.3	55.322	55.074		4.3	72.965	72.835		4.3	217.509	217.118
4.35	55.515	55.331		4.35	72.212	72.71		4.35	221.195	221.554
4.4	55.77	56.009		4.4	72.538	72.547		4.4	224.847	224.999
4.45	56.718	56.326		4.45	72.891	72.574		4.45	226.985	227.252
4.5	56.713	56.705		4.5	72.701	72.465		4.5	230.866	231.178
4.55	55.925	56.037		4.55	72.609	72.442		4.55	234.715	234.597
4.6	56.412	56.48		4.6	73.07	72.748		4.6	240.082	239.569
4.65	55.92	56.154		4.65	73.031	73.135		4.65	243.408	243.306
4.7	55.651	55.907		4.7	73.01	73.025		4.7	247.251	247.463
4.75	56.18	56.21		4.75	73.185	73.027		4.75	252.837	251.724
4.8	55.979	55.983		4.8	73.83	74.142		4.8	256.879	255.948
4.85	55.768	55.948		4.85	74.224	74.218		4.85	259.671	259.815
4.9	55.11	55.466		4.9	74.238	74.279		4.9	263.713	264.113
4.95	55.165	54.941		4.95	73.81	74.095		4.95	266.901	267.119
5	55.403	55.361		5	73.556	72.941		5	270.779	271.002
5.05	55.337	54.907		5.05	73.15	73.252		5.05	274.682	275.05
5.1	55.362	55.348		5.1	73.996	73.939		5.1	278.989	278.624
5.15	55.125	55.276		5.15	73.463	73.766		5.15	281.807	282.543
5.2	56.033	55.884		5.2	73.677	73.791		5.2	286.764	286.617
5.25	55.396	55.24		5.25	74.495	74.029		5.25	291.688	292.158
5.3	55.112	55.501		5.3	74.526	74.636		5.3	296.309	295.492
5.35	55.709	55.642		5.35	75.177	75.316		5.35	300.227	300.327
5.4	55.801	56.01		5.4	75.795	75.847		5.4	305.097	304.428
5.45	56.119	56.166		5.45	75.688	75.316		5.45	309.038	309.338
5.5	56.157	56.243		5.5	75.752	75.369		5.5	314.53	314.592
5.55	56.545	56.769		5.55	76.711	76.471		5.55	318.975	318.713
5.6	55.937	55.482		5.6	75.852	75.966		5.6	324.21	324.585
5.65	56.368	56.213		5.65	75.97	76.083		5.65	329.307	329.351
5.7	57.112	57.1		5.7	76.203	75.694		5.7	335.006	335.248
5.75	57.012	57.107		5.75	76.492	76.428		5.75	339.354	339.271
5.8	56.569	56.414		5.8	75.811	75.928		5.8	343.723	343.634
5.85	56.438	56.364		5.85	75.326	75.593		5.85	347.849	348.488
5.9	56.854	56.851		5.9	75.829	75.628		5.9	353.08	352.719
5.95	56.865	56.811		5.95	75.326	75.298		5.95	358.385	359.168
6	56.347	56.748		6	76.248	76.066		6	364.302	364.104
6.05	56.582	56.399		6.05	76.405	76.145		6.05	369.961	370.437
6.1	56.286	56.257		6.1	75.99	76.692		6.1	374.781	375.112
6.15	55.934	56.136		6.15	75.804	75.916		6.15	381.28	380.907
6.2	55.75	55.443		6.2	76.187	76.266		6.2	387.669	387.296
6.25	55.525	55.689		6.25	76.646	76.354		6.25	393.915	394.158
6.3	55.531	55.329		6.3	76.144	76.243		6.3	400.961	400.735
6.35	55.54	55.359		6.35	76.072	76.142		6.35	407.679	407.05
6.4	55.865	56.043		6.4	77.091	77.23		6.4	413.713	414.744
6.45	56.109	56.017		6.45	76.556	76.348		6.45	420.175	420.502
6.5	55.607	55.447		6.5	77.324	77.498		6.5	427.053	427.325
6.55	55.767	55.84		6.55	77.366	77.459		6.55	433.808	433.862
6.6	55.922	56.064		6.6	78.074	77.796		6.6	440.902	440.776
6.65	55.596	55.494		6.65	78.693	78.546		6.65	447.807	447.929
6.7	55.828	55.861		6.7	78.337	78.333		6.7	453.871	453.765
6.75	56.13	56.034		6.75	78.314	78.368		6.75	457.932	458.219
6.8	56.489	56.605		6.8	78.561	78.695		6.8	465.938	465.286
6.85	56.789	56.675		6.85	78.892	79.244		6.85	472.242	473.033
6.9	56.674	56.88		6.9	79.243	78.87		6.9	479.404	479.198
6.95	56.55	56.685		6.95	79.173	79.247		6.95	485.961	485.499
7	57.002	56.991		7	79.33	79.493		7	493.278	493.588
7.05	57.491	57.27		7.05	79.763	80.084		7.05	501.037	501.15
7.1	57.015	57.225		7.1	80.452	80.532		7.1	507.527	507.853
7.15	57.03	57.108		7.15	80.408	80.672		7.15	513.266	513.582
7.2	57.195	57.36		7.2	80.715	80.239		7.2	520.94	520.689
7.25	56.872	56.986		7.25	80.633	80.436		7.25	529.189	528.815
7.3	56.75	56.587		7.3	81.383	81.286		7.3	537.339	537.814
7.35	56.869	56.304		7.35	81.249	81.026		7.35	546.721	545.937
7.4	56.588	56.503		7.4	82.016	82.165		7.4	551.875	551.458
7.45	56.889	56.85		7.45	82.57	82.671		7.45	559.21	559.294
7.5	56.647	56.763		7.5	82.856	82.506		7.5	568.048	568.006
7.55	57.342	57.356		7.55	83.118	83.057		7.55	575.594	575.305
7.6	57.107	57.073		7.6	82.455	82.759		7.6	584.365	584.078
7.65	56.913	57.081		7.65	82.981	82.765		7.65	591.582	591.516
7.7	56.589	56.49		7.7	82.84	82.925		7.7	598.968	598.47
7.75	56.675	56.609		7.75	83.247	83.098		7.75	607.193	606.476
7.8	56.014	56.144		7.8	83.605	83.646		7.8	615.3	615.133
7.85	55.817	55.754		7.85	83.968	83.879		7.85	624.794	624.94
7.9	55.613	55.754		7.9	83.419	83.814		7.9	632.819	633.701
7.95	56.122	55.679		7.95	83.503	83.216		7.95	642.596	642.963
8	56.162	56.152		8	84.015	84.269		8	650.878	651.36
8.05	55.53	55.788		8.05	83.867	83.833		8.05	659.995	659.954
8.1	55.684	55.809		8.1	84.055	84.201		8.1	668.781	668.502
8.15	54.82	54.953		8.15	84.969	84.782		8.15	677.104	677.825
8.2	54.366	54.736		8.2	85.262	85.247		8.2	687.568	687.633
8.25	54.825	54.974		8.25	84.963	85.007		8.25	696.29	695.972
8.3	55.121	54.969		8.3	84.968	85.147		8.3	707.121	706.78
8.35	55.042	54.809		8.35	85.561	85.403		8.35	717.819	717.218
8.4	54.727	54.884		8.4	86.326	86.624		8.4	727.114	727.781
8.45	55.522	55.401		8.45	86.685	86.461		8.45	737.848	736.555
8.5	55.077	55.083		8.5	86.584	86.355		8.5	746.115	746.488
8.55	55.688	55.612		8.55	87.202	87.604		8.55	757.695	757.274
8.6	55.931	55.853		8.6	87.238	87.06		8.6	768.458	768.257
8.65	55.139	55.234		8.65	87.149	87.345		8.65	778.786	778.94
8.7	55.596	55.582		8.7	87.721	87.724		8.7	788.352	787.926
8.75	55.878	55.685		8.75	88.519	88.435		8.75	799.141	799.004
8.8	55.738	55.869		8.8	88.086	88.4		8.8	809.517	809.715
8.85	55.809	55.742		8.85	88.561	88.917		8.85	818.053	818.614
8.9	55.823	55.964		8.9	88.267	88.031		8.9	828.68	828.722
8.95	56.081	55.442		8.95	87.62	87.606		8.95	837.812	839.267
9	54.944	55.057		9	87.512	87.707		9	849.458	849.983
9.05	54.996	55.326		9.05	87.855	87.761		9.05	860.171	859.406
9.1	55.543	55.581		9.1	87.763	87.211		9.1	873.595	872.947
9.15	55.169	55.059		9.15	88.057	87.928		9.15	885.23	884.898
9.2	55.1	55.173		9.2	88.765	88.783		9.2	895.873	894.757
9.25	55.243	55.136		9.25	89.626	89.714		9.25	905.632	905.127
9.3	55.211	55.063		9.3	89.813	89.814		9.3	918.669	918.409
9.35	55.189	55.19		9.35	89.749	89.483		9.35	931.5	931.462
9.4	55.63	55.699		9.4	90.038	90.059		9.4	944.377	943.659
9.45	55.818	56.037		9.45	90.843	90.689		9.45	957.854	957.012
9.5	56.226	56.249		9.5	91.038	91.041		9.5	970.707	971.346
9.55	56.311	56.194		9.55	90.802	91.06		9.55	983.065	982.717
9.6	56.21	56.022		9.6	91.691	91.934		9.6	994.614	994.125
9.65	56.3	56.332		9.65	92.307	91.957		9.65	1005.85	1005.58
9.7	55.795	55.944		9.7	92.176	92.169		9.7	1016.8	1016.9
9.75	56.173	56.481		9.75	91.784	91.359		9.75	1029.89	1030.52
9.8	56.812	56.901		9.8	91.821	91.87		9.8	1043.1	1042.98
9.85	57.528	57.493		9.85	91.845	92.07		9.85	1055.39	1055.27
9.9	56.771	56.652		9.9	92.616	92.324		9.9	1067.57	1066.58
9.95	56.804	56.665		9.95	93.15	93.337		9.95	1080.3	1080.31
10	56.033	56.179		10	93.798	93.738		10	1091.74	1092.58

## Sheet: CMC_12.9uM
	Run_1				Run_2				Run_3				Run_4				Run_5				Run_6				Run_7				Run_8
Time (s)	Total A4 (uM)	Total B4 (uM)		Time (s)	Total A4 (uM)	Total B4 (uM)		Time (s)	Total A4 (uM)	Total B4 (uM)		Time (s)	Total A4 (uM)	Total B4 (uM)		Time (s)	Total A4 (uM)	Total B4 (uM)		Time (s)	Total A4 (uM)	Total B4 (uM)		Time (s)	Total A4 (uM)	Total B4 (uM)		Time (s)	Total A4 (uM)	Total B4 (uM)
0	0.1	0.1		0	0.1	0.1		0	0.1	0.1		0	0.1	0.1		0	0.1	0.1		0	0.1	0.1		0	0.1	0.1		0	0.1	0.1
0.05	26.7	29.9		0.05	30.6	30.5		0.05	30.8	30.7		0.05	29	27.4		0.05	28.8	28.1		0.05	30.8	31.4		0.05	36.5	34.7		0.05	28.9	30.2
0.1	39.7	38.1		0.1	42.4	39		0.1	38.4	39.2		0.1	39	39.7		0.1	36.1	37.3		0.1	40.6	41.6		0.1	44.7	44		0.1	34.7	34.4
0.15	42.9	44.1		0.15	41.3	43.3		0.15	39	40.2		0.15	39.7	42.2		0.15	43.4	45.7		0.15	38.7	38.6		0.15	51.9	47.6		0.15	40.4	40.4
0.2	49.4	49.1		0.2	50.7	48.1		0.2	42.4	43.7		0.2	45.8	43.9		0.2	46.8	41.8		0.2	46.1	47		0.2	49.1	50.7		0.2	46.9	46.6
0.25	50	52.2		0.25	47.3	49.8		0.25	43.8	46.4		0.25	45.1	42.8		0.25	40.5	40.6		0.25	49.1	49.4		0.25	52.3	55.5		0.25	46.3	46.5
0.3	47.6	47		0.3	49.4	49.9		0.3	45.5	46.4		0.3	43.4	48.5		0.3	44.1	46.6		0.3	45.5	45.2		0.3	51.3	52.6		0.3	49.4	50
0.35	55.5	51		0.35	47.6	49.2		0.35	47.6	48		0.35	49.8	53.7		0.35	48.9	44.6		0.35	50.2	48.6		0.35	49.8	54.3		0.35	49.3	50.4
0.4	52.6	53.2		0.4	51.8	49.9		0.4	47	46.7		0.4	54.4	53.8		0.4	50.1	50.6		0.4	46.4	43.1		0.4	46.7	48.4		0.4	49	51.3
0.45	58.4	56.6		0.45	48	48.1		0.45	44.1	43.2		0.45	54.8	55.2		0.45	54.7	51.2		0.45	52.2	50.4		0.45	57.1	58.6		0.45	48.3	50.7
0.5	55.3	54.4		0.5	50.2	51.8		0.5	48.6	48.1		0.5	55.7	55.1		0.5	52.7	49.7		0.5	54.3	56		0.5	58.5	57.2		0.5	53.3	54
0.55	57.1	59.1		0.55	51.7	53.2		0.55	50.3	46.8		0.55	52.4	53.9		0.55	50.2	47.4		0.55	55.4	59		0.55	62.6	62.9		0.55	57.6	58.5
0.6	56	55.4		0.6	56.1	52.1		0.6	51.9	50.9		0.6	50.8	51.4		0.6	53.2	50.2		0.6	62.6	60.9		0.6	58.4	59.4		0.6	60	61.3
0.65	47.9	50.2		0.65	54.9	56.6		0.65	56.2	52		0.65	47.2	49.1		0.65	52.1	51.6		0.65	52.5	53		0.65	61.3	60.1		0.65	55.3	57.8
0.7	54.4	54.5		0.7	52.1	52.3		0.7	57.3	56.9		0.7	46.6	48.2		0.7	48.8	49.1		0.7	58.3	56.2		0.7	59.4	60.4		0.7	57	58
0.75	47.8	48		0.75	57.9	59.5		0.75	56.7	57.4		0.75	48.2	46		0.75	48.8	46.9		0.75	54.9	56		0.75	58.6	59.8		0.75	63	60.2
0.8	45.7	45.6		0.8	56.4	56.8		0.8	56.6	56		0.8	53	54.4		0.8	50.4	49.5		0.8	62.7	60.8		0.8	61.8	59.8		0.8	53.9	57
0.85	54.2	56.8		0.85	53.4	53.7		0.85	57.3	56.7		0.85	50.6	53.3		0.85	51.4	51.9		0.85	61.2	62.7		0.85	58	58.5		0.85	54.6	56
0.9	50.4	52.8		0.9	56.2	54.5		0.9	61.1	59.8		0.9	56.7	54.9		0.9	51.2	49.6		0.9	63.8	61.7		0.9	53.6	55.3		0.9	53.6	54.1
0.95	49.5	50.7		0.95	54.1	52.6		0.95	61.6	62		0.95	56.5	53.5		0.95	50.7	51.6		0.95	63.7	63.9		0.95	55	54.6		0.95	60.2	61.9
1	46.3	43.7		1	57.1	53.9		1	59.3	60.1		1	56.8	57.6		1	55.7	54.8		1	64.9	66.4		1	54.3	52.8		1	61.5	60.7
1.05	38.2	41.8		1.05	52.2	55		1.05	51.9	47.9		1.05	54.5	52.1		1.05	46.7	48.1		1.05	64.8	67.7		1.05	57.1	55.1		1.05	62.6	63.4
1.1	42.8	40.7		1.1	52.8	51.3		1.1	46.6	47.5		1.1	53.3	55.4		1.1	48.4	50.4		1.1	70	69.9		1.1	53.6	55.8		1.1	64.5	63.7
1.15	48.1	47.2		1.15	50.6	51.7		1.15	51.9	48.4		1.15	56.4	55.3		1.15	51.4	51.6		1.15	62.2	66.9		1.15	55.3	55.8		1.15	65.2	65.7
1.2	46.3	49.2		1.2	54.6	53.4		1.2	48.1	46.3		1.2	56.7	58.1		1.2	46.3	47.5		1.2	57.3	59.9		1.2	48.9	48.4		1.2	64.9	64.5
1.25	44.3	47.6		1.25	52.4	52.1		1.25	47.7	46.6		1.25	62	59.2		1.25	50.6	48.3		1.25	53.9	56.7		1.25	47.1	46.4		1.25	62.2	64.2
1.3	45.2	44.2		1.3	46.8	45.9		1.3	50.6	50.3		1.3	67.4	64.8		1.3	48.9	47.3		1.3	55.6	56.2		1.3	52.9	51.5		1.3	57.7	58.4
1.35	48.5	48.3		1.35	51.1	49.4		1.35	53.9	52.5		1.35	61.7	63		1.35	50.5	50.8		1.35	58.5	59.6		1.35	48.6	48.5		1.35	61.3	61.8
1.4	51	48.8		1.4	46.9	48.5		1.4	54.7	58.1		1.4	69	64.6		1.4	49.9	49.7		1.4	57.2	56		1.4	52.1	50.4		1.4	65.2	64
1.45	51	52.6		1.45	50.4	51.5		1.45	56.1	58.7		1.45	69.4	71.7		1.45	52.8	52.7		1.45	58.3	57.7		1.45	47.8	49.3		1.45	67.3	67.8
1.5	50.2	55.5		1.5	53.9	54.5		1.5	62.9	63.6		1.5	73.1	72.6		1.5	57.5	58.9		1.5	56.9	56.4		1.5	52	47		1.5	62	63
1.55	58.7	59.9		1.55	55	57		1.55	65.5	62.9		1.55	71.4	71.7		1.55	56.7	58.6		1.55	60.6	62.7		1.55	49	47.6		1.55	60.5	63.7
1.6	55.4	54.1		1.6	58.9	58.2		1.6	59.5	60.7		1.6	76.2	73.8		1.6	56.3	57.8		1.6	59.1	61.1		1.6	45.8	47.9		1.6	67.5	66
1.65	59.5	60.3		1.65	55.2	54.9		1.65	60.4	64.2		1.65	74.7	74		1.65	59.1	60.3		1.65	55.9	53.9		1.65	46.2	46.2		1.65	63.4	61.5
1.7	62.5	62.4		1.7	58.9	59.1		1.7	65.6	67		1.7	73.5	74.5		1.7	65.8	63.7		1.7	55.6	55.3		1.7	49.4	49.7		1.7	64.3	65.5
1.75	63.5	61.6		1.75	55.9	57.6		1.75	54	53.3		1.75	69.7	67.9		1.75	67.1	68.4		1.75	54.8	54.5		1.75	54.5	53.9		1.75	68.2	68.3
1.8	62.2	61.6		1.8	62.5	62.3		1.8	56.7	57.7		1.8	70.8	72.7		1.8	61.7	58.9		1.8	63.8	59.2		1.8	59.4	58.2		1.8	71.1	70.4
1.85	65.2	63.6		1.85	58.3	58.7		1.85	53.3	54.6		1.85	67	66.5		1.85	64.2	65.7		1.85	58.8	60.5		1.85	58.5	57.2		1.85	71	69
1.9	58.7	55.6		1.9	60.2	59.6		1.9	56.1	56.2		1.9	70.4	70.3		1.9	65.2	63.4		1.9	57.8	58.5		1.9	58.7	58.5		1.9	60.9	62
1.95	55.2	55.7		1.95	63.4	61.8		1.95	65.1	65.1		1.95	68	67.8		1.95	63.5	64.9		1.95	63	62.8		1.95	55.4	56.3		1.95	60.4	59.2
2	52.4	53.8		2	61.6	61		2	57.7	59		2	57.6	59.5		2	62.3	61		2	66.9	67.6		2	54.6	54.1		2	60.1	58.2
2.05	53	55.2		2.05	57.3	57.3		2.05	59.3	59.7		2.05	53.7	53.2		2.05	57.8	55.4		2.05	62.2	62.9		2.05	56.2	57.5		2.05	59	56
2.1	53.2	54		2.1	55.4	56.5		2.1	59.9	54.5		2.1	51.3	51.2		2.1	53.2	56.3		2.1	62.3	63.9		2.1	59	56.8		2.1	67.4	64.7
2.15	52.8	54.2		2.15	56.8	55		2.15	57.5	60.8		2.15	53.8	54.4		2.15	57.9	56.8		2.15	67	69.5		2.15	57.4	52.8		2.15	59.1	59.4
2.2	55.6	54		2.2	56.6	55.5		2.2	59	57.9		2.2	53	50.9		2.2	53.2	51.8		2.2	68.4	71.3		2.2	54.6	51.4		2.2	56.6	57.2
2.25	55.5	57.9		2.25	60	57.9		2.25	65.2	64.5		2.25	55.3	55.7		2.25	53.8	53		2.25	62.7	62.4		2.25	48.5	48		2.25	50.9	54.2
2.3	58.6	58.9		2.3	60.4	63.4		2.3	55.9	56.9		2.3	52.7	50.7		2.3	57	56.6		2.3	65.1	66.2		2.3	56.4	57.6		2.3	53.2	51.7
2.35	65.3	67.7		2.35	61.7	64.1		2.35	56.2	59		2.35	49.4	46.9		2.35	60	62.7		2.35	59.2	61.3		2.35	58.3	55.3		2.35	51.3	53.2
2.4	63	63		2.4	58.3	57.8		2.4	63.3	60.8		2.4	50.4	51		2.4	60.7	62.7		2.4	58.7	60.5		2.4	59.2	58.2		2.4	50.5	54
2.45	64.4	66.7		2.45	58.4	60		2.45	54.1	56.4		2.45	51.5	50.2		2.45	58.9	59.9		2.45	57.7	54.7		2.45	58.5	56.4		2.45	61.8	60
2.5	59.2	57.9		2.5	56.3	55.4		2.5	57.1	61.7		2.5	50.2	48.3		2.5	55.4	53.6		2.5	58.2	60.2		2.5	59.2	61.7		2.5	54.4	51.9
2.55	58.5	57.3		2.55	56.8	55.8		2.55	61.1	58.6		2.55	46.7	45.6		2.55	52.1	51.7		2.55	56.2	55.6		2.55	64.2	67.3		2.55	48.6	53.2
2.6	58	56.8		2.6	50.9	49.8		2.6	56.9	56.4		2.6	48	45.4		2.6	53.9	53.6		2.6	54.6	54.4		2.6	68.9	68.7		2.6	56.2	58
2.65	59.3	58.1		2.65	56.2	55.3		2.65	60.3	63.7		2.65	55.2	54		2.65	49.9	50.1		2.65	54.4	58.4		2.65	70.6	74.7		2.65	61	58.2
2.7	54.8	55.5		2.7	48.9	51.1		2.7	60.2	58.5		2.7	57.5	58.5		2.7	47.1	48.3		2.7	54.6	53.8		2.7	74	75		2.7	56.7	59.4
2.75	57.1	57.6		2.75	54.7	54.1		2.75	61.7	60.5		2.75	52.7	50.8		2.75	51.5	53.8		2.75	50.1	47.6		2.75	69.2	68.9		2.75	57.5	58.9
2.8	51.4	51.2		2.8	50.2	52.7		2.8	62.6	62.7		2.8	48.2	46		2.8	53.9	54.3		2.8	50.6	48.7		2.8	71	67.6		2.8	59.5	55.1
2.85	56.5	58.9		2.85	57.3	58.1		2.85	58.2	58.2		2.85	46.6	45.9		2.85	51.3	49.3		2.85	51.4	52.6		2.85	62.1	60.7		2.85	50.1	53.1
2.9	56.2	59		2.9	59.8	59.9		2.9	60.1	64.7		2.9	41.6	42.3		2.9	48.4	47.5		2.9	54.7	56.5		2.9	62	63		2.9	59.2	58.2
2.95	59.9	58.3		2.95	60.7	59.8		2.95	62.2	66		2.95	45.9	47.6		2.95	47.7	50.2		2.95	55.6	54.5		2.95	58.3	55.7		2.95	57.1	56.1
3	53.5	53.6		3	56.8	58.6		3	60.3	63.2		3	46.7	47.5		3	48.7	51.2		3	48.4	50.4		3	58.9	55.2		3	58.7	57.3
3.05	54.4	54.6		3.05	61.8	60.6		3.05	57.6	55.2		3.05	52.6	50.1		3.05	49.6	46.7		3.05	42.1	41.2		3.05	55.8	57.4		3.05	53.8	55.7
3.1	57.8	58.5		3.1	60.4	62.6		3.1	55.5	53.6		3.1	53.5	57.3		3.1	51.2	51.5		3.1	42.1	41.7		3.1	60.5	60.7		3.1	50	51.3
3.15	58.1	58.7		3.15	59	61		3.15	48.7	49.9		3.15	53.3	52.9		3.15	53.2	56.2		3.15	43.5	44.4		3.15	61.6	60.9		3.15	57.5	53.6
3.2	62.1	60.7		3.2	60.5	56.8		3.2	48.3	49.4		3.2	56.3	56.8		3.2	51.7	51.2		3.2	45	43.3		3.2	57	55.1		3.2	54.7	53.3
3.25	55.7	54.6		3.25	59	61.3		3.25	54.9	54.1		3.25	54.5	54.6		3.25	55.4	57.6		3.25	41.8	40.6		3.25	55.3	53.6		3.25	51.1	48.5
3.3	59.1	60		3.3	55.1	56.3		3.3	47.4	49.5		3.3	54.5	52.9		3.3	58.9	60.1		3.3	48.9	47.3		3.3	56.9	56.9		3.3	52.7	52.5
3.35	59.3	60.1		3.35	53.8	52.2		3.35	50	51.7		3.35	54.8	57.3		3.35	61.1	62.5		3.35	51.3	54.4		3.35	52.5	54.9		3.35	53.6	51.8
3.4	60.2	60.6		3.4	57.3	58.6		3.4	43.3	43.8		3.4	53	52.8		3.4	59.2	58.1		3.4	48.7	48.9		3.4	59.2	57.3		3.4	57.8	55
3.45	61	61.8		3.45	51.7	53.8		3.45	51.8	48.7		3.45	49.4	52.7		3.45	53.3	54.5		3.45	54.6	55.6		3.45	60.8	60.7		3.45	56	55.8
3.5	69.3	66.7		3.5	50.4	51.8		3.5	48.4	50.4		3.5	55.2	52		3.5	56.1	54.5		3.5	58.3	57		3.5	63	60.1		3.5	51.5	54.4
3.55	65.1	66.7		3.55	52.3	50.5		3.55	54.3	56.1		3.55	58.5	60.8		3.55	58.5	58.2		3.55	52.9	50.9		3.55	65.1	65.9		3.55	52.9	52.8
3.6	66.3	66.8		3.6	50.7	49.5		3.6	54.4	56.3		3.6	62.8	58.8		3.6	61.3	61.4		3.6	50.7	51.8		3.6	60.9	56.6		3.6	57	53.6
3.65	68.4	63.9		3.65	49.1	52.3		3.65	54.7	52.5		3.65	53.2	48.7		3.65	56.9	58.6		3.65	53.9	57.2		3.65	55.4	55.7		3.65	55.3	56.4
3.7	69.9	68.7		3.7	51.8	51.4		3.7	60.2	60.2		3.7	49.1	50.2		3.7	51.5	50.6		3.7	52.6	56		3.7	53.2	53.9		3.7	58.1	54.6
3.75	67.9	67.3		3.75	56.4	56.2		3.75	55.4	58.7		3.75	51.5	49.5		3.75	49.3	49.6		3.75	55.4	54.3		3.75	52.2	55.7		3.75	55	55.7
3.8	57.3	56.9		3.8	52.3	51.8		3.8	60.8	58.5		3.8	47.9	47.3		3.8	44.9	44.7		3.8	55.8	52		3.8	55.2	54.7		3.8	58.3	54.6
3.85	51.5	54.4		3.85	51.7	50.2		3.85	60	57.5		3.85	45.8	50		3.85	46.8	48.6		3.85	47.3	47.9		3.85	51.5	50.4		3.85	51.7	53.8
3.9	57.3	55.5		3.9	44	46.8		3.9	52	57.1		3.9	51.7	52.5		3.9	46.1	46.3		3.9	49.2	48.1		3.9	46.3	45.2		3.9	57	57.5
3.95	56.6	56.5		3.95	48.7	47.2		3.95	52.2	52.9		3.95	48	43.6		3.95	51	49.9		3.95	54.6	57.6		3.95	48.7	47.2		3.95	51.2	49.2
4	55	53.7		4	49.3	45.3		4	54.1	55.3		4	45.4	48.7		4	50.1	49.6		4	57.6	58.5		4	44	43.5		4	45.9	45.5
4.05	55.7	53.8		4.05	51.1	49.6		4.05	54.8	53.3		4.05	51.8	51		4.05	49.7	50.1		4.05	61.7	58.9		4.05	47.9	46.5		4.05	44.5	45.3
4.1	63.7	67		4.1	58.4	57.6		4.1	64.6	61		4.1	54	55.7		4.1	48	47.4		4.1	51.8	54.4		4.1	48.8	49.1		4.1	43.9	41.6
4.15	66.7	64.9		4.15	50.8	53.6		4.15	56.4	56.4		4.15	52.1	54.6		4.15	52.6	51		4.15	53.3	53		4.15	48.6	51.4		4.15	47.5	47.4
4.2	64	65.5		4.2	48.3	46.4		4.2	55.6	55.5		4.2	54.5	54.6		4.2	53.6	53.2		4.2	51.8	51.3		4.2	52.1	53.2		4.2	51.6	49.6
4.25	56.9	59.3		4.25	53.1	52.9		4.25	47.9	47.9		4.25	54.8	53.2		4.25	55.7	58.8		4.25	51.5	50.1		4.25	53	54		4.25	52.8	51.6
4.3	57.3	56.3		4.3	45.3	48.1		4.3	49.6	47.7		4.3	63.6	63.5		4.3	53.3	52.2		4.3	52.2	51.4		4.3	50.6	52.8		4.3	50.6	47.4
4.35	52.7	52.4		4.35	51.5	52		4.35	54.8	55.3		4.35	55.6	56.3		4.35	52.6	53.8		4.35	52.5	52.7		4.35	52.1	47.3		4.35	44.1	49.2
4.4	56.8	55.6		4.4	48.8	50.5		4.4	53.6	55.8		4.4	59.4	59.7		4.4	50.9	50.4		4.4	56.2	57.8		4.4	56.8	56.7		4.4	52.9	51.8
4.45	61.3	61.7		4.45	55.4	56.3		4.45	53	53.8		4.45	60.4	61.1		4.45	54.4	52.4		4.45	55.2	53.7		4.45	59.1	58.3		4.45	54.7	53.6
4.5	60.6	62.1		4.5	50	52.9		4.5	55.6	53.6		4.5	57.3	55.7		4.5	53.5	53.5		4.5	55.6	51.4		4.5	60.4	58.7		4.5	55.2	55.4
4.55	61.7	62		4.55	49	47.1		4.55	52.6	53		4.55	57.8	60.2		4.55	56.7	56.6		4.55	50.9	50.5		4.55	50.4	49.2		4.55	54.1	53.1
4.6	65.6	65.1		4.6	50.2	51.7		4.6	56.9	56.4		4.6	55.5	54.5		4.6	61.4	59.4		4.6	51.6	51.8		4.6	46.7	45.2		4.6	54.2	51.4
4.65	58.8	59.5		4.65	54.9	55.5		4.65	57.8	54.5		4.65	56.2	56.3		4.65	63.3	62.6		4.65	47.6	46.8		4.65	53.4	51.2		4.65	45.8	51.6
4.7	66.9	67		4.7	53.4	53.9		4.7	56.3	57.4		4.7	55.8	58.4		4.7	63	65		4.7	45.4	46.4		4.7	54.6	54.2		4.7	48.5	49.4
4.75	67.8	67.9		4.75	50.7	48.3		4.75	56.1	53.1		4.75	50.5	53.5		4.75	63.9	63.6		4.75	54.2	55.8		4.75	56	56		4.75	48.7	50.4
4.8	67.4	66.1		4.8	53.1	57.1		4.8	56.2	57.1		4.8	54.3	53.1		4.8	63	62.9		4.8	51.8	49.4		4.8	62.3	62.9		4.8	44.9	46.2
4.85	69.2	67.2		4.85	52	54.2		4.85	48.9	50.2		4.85	48.8	49.7		4.85	68.3	63.7		4.85	54.5	54.8		4.85	58.3	56.2		4.85	44.6	45.3
4.9	62.5	62.1		4.9	48.4	46.2		4.9	43.4	48		4.9	51.3	52.9		4.9	64.3	64.8		4.9	55.9	55.8		4.9	56.5	54.7		4.9	49.7	52.5
4.95	63	61		4.95	47.2	46.8		4.95	44.4	44.3		4.95	50.2	49.7		4.95	66.6	60.8		4.95	55.7	54.3		4.95	61.8	62.1		4.95	47.8	43.9
5	61	64.3		5	49.2	50.9		5	49.5	48.5		5	52.2	54.6		5	56.8	53.9		5	52.1	49		5	64.2	63		5	45	40.6
5.05	57.4	56.5		5.05	44.5	45.5		5.05	46.7	47.2		5.05	47.4	47.9		5.05	56.4	55.6		5.05	56	56.8		5.05	59.2	56.6		5.05	44.1	42.9
5.1	55.7	55		5.1	45.3	46.1		5.1	45.9	49		5.1	47.9	47.1		5.1	56	53.6		5.1	52.2	55.7		5.1	64.3	62.2		5.1	43.7	45
5.15	50.3	53.9		5.15	50.4	47.9		5.15	52	50.4		5.15	45.7	43.4		5.15	52.5	50		5.15	53.2	56.5		5.15	57.4	58.1		5.15	45.5	48.9
5.2	49	50.9		5.2	44.2	43.8		5.2	50.4	52.5		5.2	47.8	45.4		5.2	51	48.5		5.2	55.1	54		5.2	52.1	54		5.2	49.5	49.5
5.25	50.7	50.1		5.25	43.8	43.5		5.25	50.3	50.1		5.25	50.4	50.1		5.25	46.7	46.3		5.25	49.1	46		5.25	49.2	51.8		5.25	48.5	50.6
5.3	46.5	46.7		5.3	43.3	43.5		5.3	55.2	52.8		5.3	46.7	51.5		5.3	49.8	48		5.3	56.2	56.8		5.3	56.1	56.4		5.3	46.6	44.7
5.35	52.9	49.7		5.35	40.4	44.8		5.35	52	55.9		5.35	50	52.6		5.35	56.8	54.9		5.35	50.9	49.9		5.35	52.2	53.1		5.35	47.9	47.2
5.4	55.3	57.3		5.4	41	40.8		5.4	50	50.4		5.4	51.9	53.5		5.4	54	54		5.4	51.5	51.5		5.4	51.9	51.4		5.4	43.6	44.4
5.45	59.3	62.2		5.45	44.8	44		5.45	56.7	53.8		5.45	53.7	58.7		5.45	50.5	51.6		5.45	57	58.2		5.45	53.3	52.1		5.45	47.8	44.1
5.5	56.5	54		5.5	45.5	46.7		5.5	59.3	61		5.5	54.4	53.2		5.5	53.5	51.8		5.5	61.9	60.9		5.5	53.5	52.2		5.5	48.4	46
5.55	55.1	54.1		5.55	43.1	43.1		5.55	64	63.8		5.55	60.5	57.7		5.55	50.5	51.4		5.55	67.2	65.4		5.55	59.7	59.9		5.55	50.5	53.5
5.6	52.3	52.4		5.6	48.8	45.6		5.6	62.3	59.2		5.6	60.1	57.7		5.6	49.1	46.2		5.6	66.5	68.7		5.6	58.3	58.2		5.6	52.8	53.4
5.65	50.9	55.4		5.65	47.3	49.3		5.65	65.3	66.6		5.65	58.9	61.1		5.65	51.5	52.5		5.65	63.3	61.7		5.65	59.7	60.6		5.65	58.1	56
5.7	56.4	58.8		5.7	48.8	54.2		5.7	70.5	68.8		5.7	56.6	58.1		5.7	55.9	56.3		5.7	62.9	65.3		5.7	64.8	67.1		5.7	56.5	55.9
5.75	52.7	51.9		5.75	48.4	48.1		5.75	69.7	71.2		5.75	52.4	52.9		5.75	58	58.6		5.75	60	56.9		5.75	63.3	64.5		5.75	64.2	62.4
5.8	51.2	53.4		5.8	44.9	44.9		5.8	78.3	78.3		5.8	59.3	57.4		5.8	56.8	56.3		5.8	59.5	58.5		5.8	65.7	63.8		5.8	62.3	61.9
5.85	53.5	48		5.85	48.7	49.2		5.85	63.9	63.2		5.85	54.2	53.8		5.85	57.6	59		5.85	62.3	61.4		5.85	62.8	64.3		5.85	55.6	55.2
5.9	50.9	50.2		5.9	47.6	47.8		5.9	61.9	65.8		5.9	50.7	52.8		5.9	58.2	59.4		5.9	57.5	57.9		5.9	58.3	60.6		5.9	53.5	53.5
5.95	50	51.7		5.95	47	46.1		5.95	64.5	64.2		5.95	54.8	52.9		5.95	51.4	53.6		5.95	56.9	58.5		5.95	56.4	54.2		5.95	49.1	51.1
6	43	47.6		6	49.2	48.2		6	58.4	61.4		6	54.9	56.2		6	46.1	47.7		6	57.3	57.4		6	58.1	60.8		6	46.5	50.1
6.05	47.5	50.6		6.05	48.7	50.1		6.05	55.7	56		6.05	53.6	54		6.05	48	49.3		6.05	53.4	55.8		6.05	64.9	64.4		6.05	52	50.1
6.1	47.3	49.6		6.1	47.4	48.4		6.1	57.9	57.5		6.1	59.8	56.8		6.1	52	54.2		6.1	60	59.2		6.1	67	65.5		6.1	54.2	54.7
6.15	51.3	47.1		6.15	43.3	47.4		6.15	51.4	52.4		6.15	57.2	57.2		6.15	52.3	53.4		6.15	57	54.9		6.15	71.8	71		6.15	56.5	59.1
6.2	49.5	50		6.2	48.7	49.5		6.2	55.8	58.4		6.2	57.8	54.7		6.2	51.5	51.7		6.2	54	51.6		6.2	71.4	70.8		6.2	53.4	53.1
6.25	49.4	51.2		6.25	51	47.8		6.25	57.8	62.1		6.25	54.9	55.3		6.25	51.3	51.4		6.25	53.8	51.3		6.25	63.7	62.3		6.25	60.5	60
6.3	45.3	44.2		6.3	46.6	47		6.3	63	59.5		6.3	48.9	48.7		6.3	47.4	47.9		6.3	53.4	51.4		6.3	63.6	60.7		6.3	55.6	54.1
6.35	47.6	48.1		6.35	47.5	46.8		6.35	62.1	60.1		6.35	47.7	51.2		6.35	49.4	47.9		6.35	50.4	51.1		6.35	64.9	64		6.35	50.2	50.6
6.4	45	48.5		6.4	48.9	45.5		6.4	60	59.1		6.4	44.5	45.4		6.4	53.6	49.7		6.4	45	48.7		6.4	63.5	68.3		6.4	52.8	50.8
6.45	41.4	44.3		6.45	51.9	51.2		6.45	57.2	57.5		6.45	45.4	43.4		6.45	47.6	44.6		6.45	48	45.5		6.45	62.8	65.5		6.45	62.2	63.5
6.5	47.5	45.9		6.5	50.5	52.6		6.5	54.6	52.4		6.5	43.1	43.1		6.5	50.6	48.2		6.5	51.2	50.4		6.5	63	67.9		6.5	59.6	58.4
6.55	52	50.3		6.55	51	51.9		6.55	57.8	56.5		6.55	47.4	46.6		6.55	48.2	46.1		6.55	47.6	47.5		6.55	59.6	58.6		6.55	65.1	65.9
6.6	50.6	52.5		6.6	52	52.3		6.6	62	60.3		6.6	45.3	44.7		6.6	51.6	53.2		6.6	45.5	47.5		6.6	58	63.1		6.6	61.4	59.8
6.65	54.5	54.6		6.65	50.7	49		6.65	57.2	60.1		6.65	49	50		6.65	47.4	46.7		6.65	49.5	49		6.65	59.6	63.8		6.65	63.1	61.7
6.7	57.2	56.6		6.7	48	48.2		6.7	56.3	53.2		6.7	49.9	51.3		6.7	49.5	51.9		6.7	50.8	49.8		6.7	59.4	60.2		6.7	63.7	61.7
6.75	56.2	57.9		6.75	48.8	52.2		6.75	51.7	50.7		6.75	52.8	54.8		6.75	52.4	50.8		6.75	53.8	51.8		6.75	64.5	64.8		6.75	68.5	69.5
6.8	55.2	55.7		6.8	47.8	46.1		6.8	49.3	48.7		6.8	53.4	52		6.8	53.6	56.6		6.8	57.3	57.6		6.8	64.7	63.3		6.8	68.1	69.8
6.85	51.6	49.7		6.85	52.9	48.1		6.85	60.2	56.6		6.85	52.7	53.2		6.85	51.2	54.2		6.85	55.3	57.2		6.85	65.6	63.6		6.85	67.2	66.6
6.9	51.5	51.9		6.9	46.9	47		6.9	53.8	53.4		6.9	54.8	54.8		6.9	50.2	50.2		6.9	57.3	56.6		6.9	56.4	56.1		6.9	70.3	71
6.95	47.8	49.2		6.95	43.4	42.4		6.95	48	49.9		6.95	56.5	53.4		6.95	48.7	48.1		6.95	56.2	56.8		6.95	55.6	55.1		6.95	63.3	63.3
7	52.4	53.7		7	51	48.3		7	52.5	51.7		7	56.6	57.3		7	49.8	50.7		7	52.3	52.2		7	62.4	61.2		7	64.8	64.6
7.05	47.5	48.5		7.05	47.4	48.1		7.05	49.9	49.7		7.05	54.9	54.7		7.05	51.9	49.9		7.05	54.6	53.7		7.05	70.2	64.5		7.05	56.2	55.1
7.1	49.6	49.6		7.1	47.8	49.6		7.1	49.2	47.7		7.1	54.1	57.6		7.1	52.8	55.5		7.1	56.2	56		7.1	62	66.3		7.1	55.1	59
7.15	48.1	46.6		7.15	50.7	53.7		7.15	46.6	49.2		7.15	53.7	52.5		7.15	46.5	49.2		7.15	52.7	53.7		7.15	59.7	62.8		7.15	59.3	57.5
7.2	51.3	52.8		7.2	50	52.8		7.2	47	47.2		7.2	57	58		7.2	49.7	48.3		7.2	55.1	56.8		7.2	66	68.1		7.2	53.9	53.4
7.25	53.4	53.6		7.25	50.5	50.7		7.25	59.6	58.8		7.25	51	52.9		7.25	47.4	46.9		7.25	56.3	58.4		7.25	69.9	68.7		7.25	52.7	54.9
7.3	53.8	55.4		7.3	49.2	50.3		7.3	61.6	58.9		7.3	54.3	56		7.3	40.9	42.3		7.3	54.8	51.4		7.3	63.6	65.9		7.3	53	50.5
7.35	51.9	54.2		7.35	52.6	50.6		7.35	63.9	60		7.35	48.2	49.9		7.35	44.2	44.6		7.35	56	55.7		7.35	62.5	59.9		7.35	45.3	47.8
7.4	53.4	50.1		7.4	49.8	48.3		7.4	61.6	62.5		7.4	45.7	44.8		7.4	48.9	48.1		7.4	53.8	57.4		7.4	55.9	55.6		7.4	50	49.6
7.45	49.6	51.1		7.45	48.3	49.4		7.45	65.1	64.9		7.45	52	53.1		7.45	52.4	51.2		7.45	58.6	55.1		7.45	53.5	54.6		7.45	48.7	50.9
7.5	46.3	43.5		7.5	52.3	51		7.5	62.3	61.2		7.5	56.1	53.9		7.5	48.9	50.9		7.5	62.5	66.2		7.5	53	53.9		7.5	48.8	47.4
7.55	51	50.4		7.55	54.5	59.1		7.55	59	59		7.55	53.9	53.5		7.55	55.3	55.2		7.55	59.1	60		7.55	48.1	52.3		7.55	55.7	54
7.6	49.9	51.1		7.6	49.8	49.8		7.6	60.4	60.6		7.6	51.9	55.5		7.6	55.3	54.1		7.6	51.3	51.8		7.6	50.8	53.7		7.6	65.2	66.1
7.65	58.3	58.6		7.65	47.7	46.4		7.65	62.3	60.4		7.65	51.2	48		7.65	59.7	60.8		7.65	51.4	52.1		7.65	53.9	52		7.65	60.5	61.5
7.7	57.8	61.7		7.7	55.2	53.1		7.7	60	57.3		7.7	50.7	49.9		7.7	57.7	61.2		7.7	50.9	50.4		7.7	52.6	53.1		7.7	60.4	59.4
7.75	63.4	62.7		7.75	53.1	53.5		7.75	60.4	56.6		7.75	55.6	54.6		7.75	61.9	62		7.75	50.7	51.3		7.75	54.8	53.7		7.75	60.4	58.6
7.8	60.4	58		7.8	48.5	47.8		7.8	54.3	51.9		7.8	51.5	50.1		7.8	61.4	63.3		7.8	51.2	50.6		7.8	58.7	62.2		7.8	61	57.7
7.85	59.3	58.8		7.85	47	48.9		7.85	55.6	51.6		7.85	51.9	50.7		7.85	61.2	64.7		7.85	50.9	52		7.85	55.5	55.9		7.85	52.1	52.3
7.9	64.6	64.1		7.9	47.1	47.1		7.9	56.1	57.1		7.9	49.4	48.1		7.9	60.9	62.3		7.9	55.7	53.8		7.9	56.3	55.8		7.9	53.2	53.5
7.95	65.7	65.1		7.95	46.9	49.1		7.95	64.7	63.1		7.95	52.4	48		7.95	63.7	59.8		7.95	56.3	57.5		7.95	56.4	57.3		7.95	53.2	54.1
8	59.5	61.6		8	49.2	46.4		8	64.2	61.9		8	50.3	51.4		8	63.4	64.4		8	53.1	53.5		8	61.7	58.5		8	50	50.2
8.05	60.3	57.1		8.05	56.3	53.5		8.05	64.8	63.7		8.05	46	48.8		8.05	64	64.9		8.05	49.7	52.6		8.05	56.9	61.3		8.05	53	51.1
8.1	62.7	64.1		8.1	58.4	53.4		8.1	63	62.3		8.1	45.2	43.9		8.1	65.9	66.5		8.1	49	50.8		8.1	61.5	62.9		8.1	55.7	53.3
8.15	58.2	60.7		8.15	52.9	51.7		8.15	54.8	51.9		8.15	43.6	45.8		8.15	70	67.2		8.15	54.7	51.3		8.15	57	55.7		8.15	56.6	58.7
8.2	52.6	53.2		8.2	51.5	47.7		8.2	48	53.2		8.2	42.3	43.2		8.2	73.1	74		8.2	50	49.5		8.2	56.3	56.7		8.2	54	56.4
8.25	50.9	52.8		8.25	49.8	50.5		8.25	58.7	53.1		8.25	47.6	48.2		8.25	79.2	76.7		8.25	50	48.6		8.25	56.4	57.9		8.25	60.6	59.1
8.3	51.2	51		8.3	58	55		8.3	55.9	59.4		8.3	49.8	50.5		8.3	74	74.4		8.3	45.5	43.6		8.3	57.9	60.4		8.3	56.2	58.1
8.35	53.4	55.1		8.35	52.9	50		8.35	57.1	54.6		8.35	54.1	53.1		8.35	73.2	75.8		8.35	44.9	48.3		8.35	51.4	54		8.35	59.7	60.3
8.4	55.7	53.4		8.4	51.4	50.9		8.4	54.7	55.3		8.4	49.2	48.8		8.4	74.6	76		8.4	47	47.4		8.4	56.1	56.1		8.4	60.6	60.4
8.45	58.1	56		8.45	50.9	52.5		8.45	54.6	52.2		8.45	48.6	48.3		8.45	79.5	76.7		8.45	50.9	48.1		8.45	58.2	56.2		8.45	61.6	62.7
8.5	63.4	63.7		8.5	52.1	55.8		8.5	61.8	59.4		8.5	47.7	49.1		8.5	77.3	76		8.5	53.3	54.6		8.5	51.4	51.7		8.5	58.9	59.9
8.55	55.8	55.1		8.55	52.4	50.8		8.55	67.6	65.5		8.55	50.4	51.3		8.55	81.7	79.7		8.55	52	51.4		8.55	51.1	52.3		8.55	59.4	58.8
8.6	54.6	52.7		8.6	47.5	48.2		8.6	62.5	63.4		8.6	54.8	57.8		8.6	78.9	82.1		8.6	44.1	46.9		8.6	57.2	58.2		8.6	61.7	60.2
8.65	58.7	55.5		8.65	51.1	50.9		8.65	59.4	59.8		8.65	51.7	51.8		8.65	75.6	77.6		8.65	51.8	55.8		8.65	53.7	53.6		8.65	54.6	57.4
8.7	53.9	55.1		8.7	50	51.9		8.7	53.8	53.4		8.7	50.8	52.5		8.7	76.3	75.5		8.7	52.2	51.5		8.7	50.6	49.5		8.7	60.9	60.1
8.75	53	50.7		8.75	54.9	53.9		8.75	53.4	54.6		8.75	51.2	50.1		8.75	68.1	69.2		8.75	49.7	48.1		8.75	51.6	54		8.75	59.7	58
8.8	49.8	50.2		8.8	57.9	57.3		8.8	57.4	57.2		8.8	51.3	49		8.8	64.2	63.1		8.8	54.7	54.7		8.8	47.3	49.3		8.8	59.8	59.7
8.85	49.9	49.1		8.85	63.1	62.4		8.85	55.4	56.7		8.85	53.2	51		8.85	62.7	62.9		8.85	58	58.4		8.85	52.8	53.6		8.85	56.6	56.4
8.9	47	47.5		8.9	69.9	69.5		8.9	52.8	53		8.9	52.4	53.4		8.9	63.1	65.5		8.9	55	53		8.9	51.8	49.8		8.9	55.3	54.3
8.95	47.3	46.6		8.95	75.1	75.5		8.95	60.4	57.6		8.95	54.9	53.7		8.95	57.2	56.4		8.95	53.9	56.2		8.95	55.6	53.1		8.95	54.3	50.8
9	42.2	43.4		9	77.5	78.7		9	53.6	51.8		9	52.5	52.6		9	51.1	50.8		9	50.7	52.8		9	54.1	50.3		9	51.2	47.8
9.05	44.2	46.1		9.05	75.4	76.2		9.05	53.6	54.8		9.05	47.8	46.2		9.05	47.4	45.5		9.05	49.5	47.7		9.05	51.9	53.5		9.05	51.2	51
9.1	51.3	51.4		9.1	66.6	68.6		9.1	55.3	60.6		9.1	51.2	49.5		9.1	50.3	48.6		9.1	50.4	50.2		9.1	57.7	57.1		9.1	51.2	50.9
9.15	50.5	51.6		9.15	65.1	65.6		9.15	57.3	54		9.15	55.7	55.5		9.15	54	52.5		9.15	51.7	49.6		9.15	61.6	58.3		9.15	57.3	55.9
9.2	43.9	46		9.2	72.6	72.9		9.2	58.5	55.3		9.2	51.3	51.4		9.2	48.6	50.3		9.2	55.7	55.2		9.2	63.5	65.9		9.2	63.8	60.9
9.25	48.4	47.2		9.25	70	70.7		9.25	55	51.8		9.25	52.6	48.1		9.25	49.9	51		9.25	49.9	52.5		9.25	58.5	59.1		9.25	59.9	60.1
9.3	50.7	51.5		9.3	74.7	74		9.3	59.3	58.7		9.3	52.1	50.8		9.3	50.6	52.9		9.3	55.7	52.9		9.3	58.8	61.6		9.3	57.9	58.1
9.35	55.2	55.3		9.35	77.3	79.5		9.35	57.7	54.9		9.35	50.5	46.6		9.35	47.5	46.3		9.35	55.2	55		9.35	59.2	58.7		9.35	51.7	54.8
9.4	60.8	61.3		9.4	69.4	68.5		9.4	57.7	53.9		9.4	54.8	52.9		9.4	44.9	47.3		9.4	55	52.9		9.4	58.8	56.8		9.4	46.7	51.5
9.45	61.1	58		9.45	66.4	67.4		9.45	54.6	55.1		9.45	45.2	45.5		9.45	49	50.8		9.45	51.9	52.9		9.45	52.8	48.9		9.45	50.6	46.9
9.5	57.3	56.5		9.5	59.4	58.4		9.5	50	50.9		9.5	43.6	43.2		9.5	54.5	56.5		9.5	51.6	51.7		9.5	54.4	57.8		9.5	52	52.6
9.55	52.8	51.2		9.55	57	58		9.55	49.2	50.7		9.55	46.8	44.4		9.55	50.6	51.8		9.55	50.3	51.5		9.55	61.2	59.7		9.55	46.9	47
9.6	47.2	48.9		9.6	57.9	55.7		9.6	56.2	53.6		9.6	47.2	44.3		9.6	54.1	54.5		9.6	53.1	54.5		9.6	63.7	58.1		9.6	46.3	45
9.65	48.9	50.9		9.65	60	62.3		9.65	54.3	54.9		9.65	44.1	40.4		9.65	59.2	57.9		9.65	50	52.6		9.65	62.7	61.8		9.65	50.2	50.7
9.7	48.9	48.3		9.7	58.3	57.3		9.7	52.4	49.9		9.7	46.7	44.2		9.7	66.3	63		9.7	55.4	53.7		9.7	58.9	60.1		9.7	51.9	51.1
9.75	49.3	49.9		9.75	55.1	54.2		9.75	58.7	61.4		9.75	45.1	46.7		9.75	65.9	68.5		9.75	55.1	52		9.75	55.6	56.4		9.75	52.6	52.2
9.8	50.4	49.9		9.8	56.8	59.8		9.8	63.7	63		9.8	51.4	49.7		9.8	70.3	68.9		9.8	40.5	41.6		9.8	54.1	51.5		9.8	53.1	53.5
9.85	54.9	54.9		9.85	53.8	54.8		9.85	61.9	63.1		9.85	49.7	47		9.85	66.4	64.5		9.85	46.2	47.8		9.85	53.2	53.1		9.85	61.1	62.7
9.9	51	51.6		9.9	58.6	56.9		9.9	60.3	61.6		9.9	49.6	48.2		9.9	67.4	64.7		9.9	50.2	47.7		9.9	57.3	57		9.9	60.8	60.6
9.95	54.4	56.1		9.95	58	57.1		9.95	57.6	57.5		9.95	53.5	55.2		9.95	66.3	66		9.95	50.4	49.2		9.95	63.6	63		9.95	60.8	61.7
10	54.3	55.7		10	48.3	45.8		10	51.2	49		10	57	55.7		10	62.9	62.1		10	56	58.2		10	61.3	60.2		10	55.5	56.3

## Sheet: CMC_13uM
	Run_1				Run_2				Run_3				Run_4				Run_5				Run_6				Run_7				Run_8
Time (s)	Total A4 (uM)	Total B4 (uM)		Time (s)	Total A4 (uM)	Total B4 (uM)		Time (s)	Total A4 (uM)	Total B4 (uM)		Time (s)	Total A4 (uM)	Total B4 (uM)		Time (s)	Total A4 (uM)	Total B4 (uM)		Time (s)	Total A4 (uM)	Total B4 (uM)		Time (s)	Total A4 (uM)	Total B4 (uM)		Time (s)	Total A4 (uM)	Total B4 (uM)
0	0.1	0.1		0	0.1	0.1		0	0.1	0.1		0	0.1	0.1		0	0.1	0.1		0	0.1	0.1		0	0.1	0.1		0	0.1	0.1
0.05	32.3	36.3		0.05	29.7	27.8		0.05	34.4	33.5		0.05	30.2	29.4		0.05	32.5	32.1		0.05	31.8	30.5		0.05	31	31.1		0.05	29.1	29.3
0.1	41.8	41.3		0.1	36.9	38.4		0.1	39.5	41		0.1	36.7	34.6		0.1	36.6	40.7		0.1	37.6	36.2		0.1	39.5	38.6		0.1	40.1	39.2
0.15	46.6	47.6		0.15	43.6	42.6		0.15	42.8	43.4		0.15	43.6	42		0.15	43.4	46		0.15	43.6	42.3		0.15	47.1	45.6		0.15	47	42
0.2	45.6	46.1		0.2	54.9	53.7		0.2	46.3	48.7		0.2	41.5	42		0.2	50.4	49.5		0.2	46	45.3		0.2	47.5	47.3		0.2	47.5	48.1
0.25	46.1	47.3		0.25	57	54.5		0.25	51	48.8		0.25	46.5	49.3		0.25	50.1	48.5		0.25	50.8	47.4		0.25	55	56.1		0.25	48	51
0.3	50.7	50.4		0.3	55.4	55		0.3	51.2	53.4		0.3	49.4	49		0.3	55.6	54.2		0.3	54.4	53		0.3	55.6	55.6		0.3	51.1	51.1
0.35	51.1	52.2		0.35	51.9	53.9		0.35	55.9	58.5		0.35	49.6	48.3		0.35	56.5	55.7		0.35	51.4	51.2		0.35	61.8	64.1		0.35	48.7	47.4
0.4	50.5	49.3		0.4	54.4	53.2		0.4	54.5	54.7		0.4	54.4	54.1		0.4	57.6	56.5		0.4	52.9	54		0.4	63.1	60.6		0.4	51.9	52.1
0.45	46.2	47.9		0.45	59.2	58		0.45	57.3	59		0.45	55.5	55.5		0.45	59.5	55.8		0.45	54.3	56.9		0.45	61.6	62.2		0.45	50.8	52.2
0.5	48	48.2		0.5	57.2	59.3		0.5	63.7	65.6		0.5	72	69.4		0.5	61	59.7		0.5	54.7	52.8		0.5	59	58.5		0.5	54.3	53.3
0.55	52.1	50.2		0.55	59.4	58.6		0.55	63.5	60.4		0.55	74.6	73.7		0.55	53.5	53.2		0.55	51.6	52.2		0.55	65.8	63.1		0.55	57.7	55.9
0.6	56.7	54.1		0.6	65.1	60.7		0.6	64	64		0.6	78	77.7		0.6	53.9	51.2		0.6	52.6	51.1		0.6	58.9	57.9		0.6	56.9	56.2
0.65	57.2	60.6		0.65	63.7	66.3		0.65	64.9	64.5		0.65	74.5	76.2		0.65	59.1	58.5		0.65	52	49.6		0.65	50.9	52.3		0.65	58.5	57.3
0.7	56.8	61.4		0.7	64.9	66.9		0.7	71.5	72.1		0.7	76.5	81.1		0.7	55.5	57.2		0.7	49.1	47.4		0.7	53.5	55.9		0.7	60.2	58.3
0.75	58	60		0.75	64.2	64.6		0.75	70.7	67.3		0.75	76.4	76.5		0.75	57.9	59.5		0.75	47.7	48		0.75	53	51.3		0.75	62.6	62.6
0.8	64.9	67.4		0.8	66.7	65.5		0.8	70.2	68.9		0.8	78.3	80.1		0.8	63.7	64.6		0.8	47.4	47.5		0.8	52.1	54.4		0.8	64.5	59.8
0.85	65	64		0.85	75.5	77.2		0.85	73.1	71.5		0.85	75	75.5		0.85	63.4	63.7		0.85	48.2	50.2		0.85	50.5	51.5		0.85	65.7	63.7
0.9	60.7	64.4		0.9	78.1	79.6		0.9	69.5	70.6		0.9	82.8	82		0.9	69.1	68.7		0.9	42.8	48.4		0.9	56.6	54.6		0.9	65.2	65.5
0.95	54.2	52.4		0.95	78.2	77.8		0.95	64.9	64.4		0.95	85.7	84.2		0.95	68.6	66.4		0.95	45.7	48		0.95	60.2	55.7		0.95	64.8	64.9
1	53.5	49.9		1	76.1	77.1		1	64.5	64.4		1	87.6	86.6		1	68.6	64.2		1	48.4	48		1	68.1	68.2		1	66.2	68.5
1.05	60.1	59.2		1.05	79	77.4		1.05	68.1	66		1.05	94.6	94.1		1.05	68	72.6		1.05	46.7	46.5		1.05	69.9	72.2		1.05	73.9	71.5
1.1	66.6	64.9		1.1	75.3	74.2		1.1	69.3	70.2		1.1	92.8	89.7		1.1	69.4	67		1.1	48.5	50.2		1.1	73.6	69.1		1.1	72.7	70.1
1.15	66	63.8		1.15	78	77.4		1.15	67.4	68.2		1.15	90.2	90.2		1.15	75.2	72.8		1.15	47.2	49.7		1.15	69.2	69.5		1.15	62.2	65.4
1.2	68.4	68.4		1.2	80.6	76.7		1.2	67.1	68.2		1.2	88.6	84.2		1.2	70.4	70.8		1.2	58.7	56.8		1.2	70.1	69.9		1.2	55.9	57.3
1.25	71.7	72.4		1.25	70.7	77.1		1.25	63.3	64.2		1.25	90.1	89.7		1.25	70.1	71.4		1.25	63.9	62.9		1.25	74.4	74.4		1.25	58	55.9
1.3	69.9	70.1		1.3	76.7	75.7		1.3	59.7	59.3		1.3	88.5	91.8		1.3	70.8	70.9		1.3	62	64.1		1.3	62.5	61.5		1.3	62.9	56.5
1.35	72.6	75.4		1.35	75.2	75.6		1.35	61.5	62.8		1.35	89.5	95.5		1.35	65.3	63.8		1.35	68.3	67.1		1.35	62.8	62.7		1.35	61.6	62.4
1.4	69.6	67.4		1.4	69.9	70.6		1.4	57.6	57.7		1.4	97.4	94.6		1.4	68.4	67.9		1.4	66.2	65.9		1.4	62.5	65.4		1.4	70.2	73.1
1.45	63.8	65.3		1.45	72.8	67.5		1.45	58.4	57.1		1.45	96.9	98.1		1.45	68.7	67		1.45	68.6	67.9		1.45	62	60.3		1.45	67.2	70.9
1.5	62.2	60.4		1.5	68	69.5		1.5	64.3	63.6		1.5	96.2	98.5		1.5	71.3	71.1		1.5	70.6	72		1.5	62.4	63.9		1.5	64.8	66.4
1.55	59.3	60.7		1.55	68.1	70.4		1.55	60.9	64		1.55	90.3	91.2		1.55	74	73.3		1.55	72	70.9		1.55	64.4	62.4		1.55	67.8	67.5
1.6	66.3	67.9		1.6	69.8	70.9		1.6	58.6	59.4		1.6	91.4	91.4		1.6	75.6	76.3		1.6	71.3	67.1		1.6	65.5	67.4		1.6	66.3	66.8
1.65	69.4	72.6		1.65	71.9	74.4		1.65	62.2	63.2		1.65	91.3	91.5		1.65	83.4	83.4		1.65	72.7	70.6		1.65	65.5	67.7		1.65	66.8	67.8
1.7	67.6	63.8		1.7	73.8	78		1.7	62.8	61.5		1.7	98	97.1		1.7	85.1	85.2		1.7	66.7	67.8		1.7	70.1	69.3		1.7	72.6	69.4
1.75	63.1	58.6		1.75	76.2	76.6		1.75	66.9	69.3		1.75	101.8	99.4		1.75	87.5	83.8		1.75	73.6	71.7		1.75	72.6	70.1		1.75	67.2	66.8
1.8	59.2	60.9		1.8	83.1	81.8		1.8	61.7	62.2		1.8	99.3	101.3		1.8	88.1	90.5		1.8	71.4	70.7		1.8	72.8	72.4		1.8	67.3	67.1
1.85	60.2	59.9		1.85	86.4	87.9		1.85	65	61.9		1.85	107.5	109.8		1.85	84.1	83.4		1.85	74.4	75.1		1.85	75.8	74.6		1.85	62.2	62.8
1.9	61.1	63.5		1.9	84	82.1		1.9	62.4	62		1.9	104.8	107		1.9	79.3	77.1		1.9	75.3	76.6		1.9	72.5	76.8		1.9	63	64.6
1.95	65.8	67.6		1.95	87.3	85.6		1.95	65.7	65.1		1.95	106.2	103.4		1.95	74.8	76.7		1.95	79.8	78.5		1.95	71.7	68.9		1.95	57.2	57.8
2	60.4	61.7		2	91.3	86.1		2	65.2	66.9		2	112	108.3		2	77.2	76.1		2	90.6	86.4		2	69.7	70		2	58.6	59.9
2.05	61	63.9		2.05	83.2	82.8		2.05	73.3	73.5		2.05	114.6	111.7		2.05	78.7	81.6		2.05	86.9	89.6		2.05	59.3	62.7		2.05	54.8	53.6
2.1	58	59.3		2.1	80.9	81.7		2.1	71.6	72.6		2.1	117.3	116.4		2.1	85.9	84.6		2.1	93.8	96.3		2.1	65.1	63.1		2.1	54.4	53.9
2.15	59.3	58.7		2.15	81.7	80.1		2.15	74.3	72.4		2.15	116.2	115.4		2.15	85	85.8		2.15	98.1	99		2.15	55.9	55.2		2.15	59.4	57.1
2.2	58.8	55.7		2.2	87.7	85.7		2.2	73	72.1		2.2	119.7	120.2		2.2	84.4	82		2.2	94.7	95.9		2.2	55.7	55.6		2.2	62.5	57.3
2.25	64.9	64		2.25	88.1	87.8		2.25	78.7	78.8		2.25	117.3	121.4		2.25	81.5	81.3		2.25	92.3	88.8		2.25	60.6	60.2		2.25	64.5	63.3
2.3	65.1	66.8		2.3	85.6	85.5		2.3	81.5	81.2		2.3	125.8	123.9		2.3	72.9	76.3		2.3	95.4	97.8		2.3	66.4	63.1		2.3	57.4	59.9
2.35	69	73.1		2.35	78.1	78.6		2.35	82.2	77		2.35	115.1	116.4		2.35	73	71.7		2.35	88.6	91.1		2.35	63.5	63		2.35	56	58.3
2.4	71.2	70.6		2.4	70.1	70.1		2.4	74.7	77.4		2.4	116.7	117.8		2.4	72.3	69.6		2.4	90.7	92.7		2.4	67.9	68.4		2.4	49.3	47
2.45	65.6	61.5		2.45	67.7	69.1		2.45	75.5	77		2.45	121	126.1		2.45	73.3	69.8		2.45	94.1	94.7		2.45	64.4	64.8		2.45	49.2	50.7
2.5	59.8	61.4		2.5	69.9	69.9		2.5	85.3	82.6		2.5	117.2	115.9		2.5	66.9	67.9		2.5	89.9	96.6		2.5	57.7	56.2		2.5	52.4	53.6
2.55	60.1	60.8		2.55	72.2	70.1		2.55	89.4	88.7		2.55	128.4	125.4		2.55	77.3	73.6		2.55	78.4	81.4		2.55	58	57.9		2.55	60.7	61.4
2.6	60.9	60.5		2.6	73.5	72.3		2.6	86.4	83.3		2.6	128.1	127.9		2.6	71	70.6		2.6	83.2	82		2.6	61.9	65.4		2.6	56.4	58.3
2.65	64	63		2.65	70.6	70.5		2.65	88.2	86		2.65	123	127.5		2.65	70.6	72.5		2.65	84.1	83		2.65	62.2	66.1		2.65	58.9	55.9
2.7	64.2	65.5		2.7	63.9	67.9		2.7	83.9	87.4		2.7	118.4	119.1		2.7	62.5	59.3		2.7	79	83		2.7	64.7	64.6		2.7	54.9	60.5
2.75	59.5	62.5		2.75	73.5	69.5		2.75	89.3	90.2		2.75	119.7	115.2		2.75	56.4	55.8		2.75	74.5	78.1		2.75	65.3	66.9		2.75	60.3	60.8
2.8	57.7	55.3		2.8	67.5	67.2		2.8	82.1	84		2.8	106.4	106.7		2.8	56.7	56.7		2.8	84.4	85		2.8	65.3	63.5		2.8	60.9	60.5
2.85	63.9	62.5		2.85	66.1	64.2		2.85	77.2	75.5		2.85	107.3	109.6		2.85	56.4	54.1		2.85	86.9	85.5		2.85	65.6	64		2.85	61.2	60.1
2.9	61	62.6		2.9	64.3	63.2		2.9	73.9	74.5		2.9	106.8	105.3		2.9	61.1	56.7		2.9	84.2	84.5		2.9	65.7	67		2.9	65.4	64.6
2.95	61.2	63.2		2.95	65.7	67.5		2.95	74.5	76.3		2.95	99	99		2.95	61.5	58.1		2.95	77.2	77.2		2.95	66	66.1		2.95	67.3	63.2
3	62.1	62.3		3	76.4	72.3		3	83.1	83.1		3	102.2	99.7		3	64.9	63.8		3	72.8	73		3	66.4	64.1		3	65.1	66.9
3.05	67.8	67		3.05	77.1	76.7		3.05	79.1	79.5		3.05	102.9	105.4		3.05	57.8	59.1		3.05	68.2	67.3		3.05	71.2	71.8		3.05	63.4	64.5
3.1	60.6	61.5		3.1	75.2	78.4		3.1	69.5	72.1		3.1	93.5	91.8		3.1	55.9	55.2		3.1	66.5	65.5		3.1	73.6	73.1		3.1	66.5	64.9
3.15	60	58.3		3.15	81.4	80.5		3.15	74.6	75.9		3.15	87.4	88.4		3.15	50.6	49.7		3.15	72.4	71.2		3.15	74.9	74.1		3.15	69.2	70.1
3.2	68	64.5		3.2	84.1	80.8		3.2	76.2	76.2		3.2	85.7	86.7		3.2	57.1	60.6		3.2	72	73.7		3.2	78.3	78.4		3.2	69.9	69.6
3.25	70.4	70.2		3.25	78.6	79.5		3.25	82.5	83.6		3.25	88.8	90.6		3.25	58.5	57.6		3.25	74.9	74.9		3.25	88	87.3		3.25	69.9	70.8
3.3	66.8	67.9		3.3	83.3	78.6		3.3	85.6	82		3.3	84.8	83.6		3.3	60.4	59.3		3.3	73	70.7		3.3	95.3	98.2		3.3	72.7	74.9
3.35	67.5	70.3		3.35	75.3	73.5		3.35	86.3	88.8		3.35	85.8	87.6		3.35	58.9	59.5		3.35	73.2	73.5		3.35	94.6	97.7		3.35	74.5	75.5
3.4	68.3	69.8		3.4	67.9	65.3		3.4	91.6	92.4		3.4	84	84		3.4	57.1	58		3.4	72	71.1		3.4	98.4	98.4		3.4	79.1	74.5
3.45	67.4	68.6		3.45	61.9	61.7		3.45	95.5	96.9		3.45	87.6	86.9		3.45	60.8	57		3.45	76	76.8		3.45	100.3	97		3.45	87.8	85.8
3.5	73.6	73.5		3.5	57.2	56.6		3.5	94	95.8		3.5	84.9	86.6		3.5	65	60.9		3.5	73.5	74.2		3.5	104.1	101.7		3.5	85.7	92.6
3.55	73.4	71.4		3.55	50.9	52.8		3.55	88.6	90.8		3.55	88.7	86.1		3.55	63.4	63		3.55	66.2	65		3.55	98	100.1		3.55	89.7	84.8
3.6	75.4	79.2		3.6	55	53.8		3.6	93.6	90.3		3.6	95.8	93.2		3.6	62.5	62.1		3.6	66	68.4		3.6	93.2	92.1		3.6	86.7	88.7
3.65	77.8	79.2		3.65	51.7	51.9		3.65	90	91.9		3.65	84.3	89.1		3.65	65.1	63.9		3.65	61.1	58.8		3.65	88.8	89.1		3.65	90.8	88.6
3.7	80.3	78.2		3.7	51.2	52.5		3.7	92.9	88.9		3.7	83.2	83.9		3.7	60.5	60.4		3.7	64.4	64.5		3.7	99.3	99.6		3.7	90	90.5
3.75	73	73.1		3.75	44.7	49		3.75	93.9	94.6		3.75	82.7	86.2		3.75	61.2	59.9		3.75	62.6	61.8		3.75	97.5	95.3		3.75	92.9	94.8
3.8	78.1	78		3.8	51.4	51.1		3.8	103.8	103.8		3.8	80.5	80.5		3.8	65.1	65.3		3.8	55.3	54.8		3.8	98.9	93.4		3.8	102.6	95.1
3.85	79.1	77		3.85	53.2	51.5		3.85	102.8	102.9		3.85	78.7	79.6		3.85	70.6	71.4		3.85	62	59.5		3.85	99.7	99.3		3.85	101.5	101.6
3.9	78.3	78.2		3.9	56.3	53.3		3.9	107.4	111.5		3.9	85.4	82		3.9	70.5	74.7		3.9	63.4	60.7		3.9	102.9	99.2		3.9	100.2	96.8
3.95	79.5	78.1		3.95	59.1	57.7		3.95	99.7	98.4		3.95	85.4	88.9		3.95	60.5	62.9		3.95	65.4	64		3.95	95.7	99.8		3.95	96.7	95.9
4	72	72.2		4	57.4	60.2		4	96.6	97.9		4	90.2	88		4	66.8	62.1		4	64.3	61.8		4	96.1	102.2		4	100.5	96.9
4.05	80.4	79.7		4.05	59.7	57.7		4.05	106.3	103.1		4.05	95	94.3		4.05	68.9	68.9		4.05	63.1	63.8		4.05	93.5	92.6		4.05	103	101
4.1	80.2	77.9		4.1	60.2	59.3		4.1	98.5	96.2		4.1	90.9	95.1		4.1	68.8	67.9		4.1	68.9	67		4.1	85.9	89.6		4.1	105.3	105
4.15	79.2	81.1		4.15	53.8	54.8		4.15	109.8	107.6		4.15	95.1	92.9		4.15	71.7	68.5		4.15	65.7	67.1		4.15	89.6	89.9		4.15	105.9	106.2
4.2	79.1	80.3		4.2	57.9	56.6		4.2	100.9	100.9		4.2	95.7	94.8		4.2	67.8	70.4		4.2	64.9	66.7		4.2	84.4	85.2		4.2	106	108
4.25	86.5	86.2		4.25	56.8	57.7		4.25	98.1	96.7		4.25	105.6	105.5		4.25	64.7	69		4.25	71.4	70.1		4.25	88.3	87.3		4.25	108	108.3
4.3	79.3	78.9		4.3	62.9	59.2		4.3	102.2	103.4		4.3	106.9	108.8		4.3	66.1	68		4.3	75.4	76		4.3	80.6	80.6		4.3	105.4	106.4
4.35	77.7	83.3		4.35	57	60.7		4.35	95.4	96.2		4.35	105.7	108.8		4.35	67	66		4.35	73.8	74.1		4.35	84.1	83.5		4.35	113.3	109.3
4.4	85	83.1		4.4	65.8	63.7		4.4	95	97.9		4.4	105.6	107.6		4.4	65.6	64.5		4.4	72.6	73.6		4.4	80.2	82		4.4	116.2	117.3
4.45	82.2	84		4.45	57.9	57.9		4.45	99.4	94.8		4.45	115.1	114.9		4.45	66.6	64		4.45	70	70.6		4.45	89.9	89.7		4.45	110.9	112
4.5	80.9	77.9		4.5	50.3	54.1		4.5	91.5	90.8		4.5	112.9	112.3		4.5	66	61.3		4.5	64	63.4		4.5	89.5	90.8		4.5	112.7	113.4
4.55	74.1	74.2		4.55	55.7	53.5		4.55	91.3	91.6		4.55	113.9	121.3		4.55	62.8	65.7		4.55	58.9	55.6		4.55	96	94.1		4.55	109.4	110.2
4.6	70.5	72		4.6	60.2	58.3		4.6	92.2	90.6		4.6	120.8	120		4.6	60.5	59.7		4.6	64.9	63.1		4.6	87.2	87.2		4.6	101.8	104.2
4.65	67.8	67.8		4.65	53.6	55.2		4.65	82.4	82.4		4.65	120.9	122.9		4.65	58.5	61.3		4.65	61.9	63.7		4.65	92.8	93.8		4.65	109	111
4.7	62.2	63.6		4.7	58.6	58.7		4.7	81	86.9		4.7	126.6	126.2		4.7	53.6	55.8		4.7	61.5	62.5		4.7	96.1	95.2		4.7	111.8	108
4.75	54.1	56.6		4.75	60	59.4		4.75	83.2	84.9		4.75	131.6	125.7		4.75	56.9	59.4		4.75	59.8	60.9		4.75	97.4	92.7		4.75	102.4	103.5
4.8	53.9	58.4		4.8	60.2	59.9		4.8	79.4	76.9		4.8	133.4	131.4		4.8	59	60.2		4.8	59.9	57.2		4.8	92.1	95.6		4.8	105.1	103.4
4.85	63	61.4		4.85	58.3	59.8		4.85	77.1	78.1		4.85	135.2	135.6		4.85	56.5	57.3		4.85	57	57.7		4.85	97.5	95.8		4.85	98.1	98.4
4.9	58.3	59.5		4.9	67.7	67.3		4.9	74.7	74.9		4.9	132.1	128.3		4.9	58.7	60.3		4.9	51.6	54		4.9	93	94.4		4.9	102.1	98
4.95	62.6	57.4		4.95	59.9	59		4.95	73.2	78.8		4.95	125.7	127.8		4.95	61.1	57.4		4.95	56	53.9		4.95	92.3	94.9		4.95	99.4	100.5
5	60.4	60.1		5	58.1	55.4		5	78.4	78.5		5	129.9	128.9		5	56.5	55		5	59.7	60		5	82.5	83.4		5	101.4	101.3
5.05	60.2	58.6		5.05	53.2	52		5.05	77.5	81.7		5.05	130.4	135.4		5.05	51.5	52.6		5.05	61.7	59.4		5.05	94	89		5.05	98.5	96.8
5.1	64.2	65.2		5.1	55.5	57.6		5.1	75.2	76.8		5.1	137.1	136.1		5.1	56	57.2		5.1	58.2	59.9		5.1	90.9	89.6		5.1	103.3	102.7
5.15	55.6	57.9		5.15	57.3	58.1		5.15	75	72.3		5.15	148.8	150.4		5.15	56	56.3		5.15	58.2	59.1		5.15	95.4	93.9		5.15	95.4	94.6
5.2	58.2	58.4		5.2	60	58.6		5.2	68.4	70.1		5.2	148.9	151.8		5.2	60.2	58.8		5.2	59.8	61.2		5.2	97.3	98		5.2	97.8	97.2
5.25	53.4	56		5.25	62.3	63.6		5.25	64.2	65		5.25	152.5	150.5		5.25	58.3	58.8		5.25	60.2	63.2		5.25	107.9	103.1		5.25	103.9	107.7
5.3	53.1	52		5.3	68.4	68.6		5.3	71.9	69.1		5.3	153.5	151.4		5.3	64.4	63.9		5.3	62.8	65.6		5.3	100	100.2		5.3	105.2	106
5.35	57.5	53.8		5.35	69.1	69.5		5.35	70.3	71.2		5.35	144.5	143.5		5.35	59.7	64.8		5.35	70.4	67.2		5.35	101	101.3		5.35	109.5	111.1
5.4	63.4	61.2		5.4	77.2	77.6		5.4	67.8	69.8		5.4	145.8	146.4		5.4	69.4	69.6		5.4	63.6	62.5		5.4	104.5	102.2		5.4	110.7	110.1
5.45	56.4	57.5		5.45	75.1	77.6		5.45	70.7	70.9		5.45	162.2	164.6		5.45	74.9	75		5.45	59.5	62.1		5.45	101.3	101.5		5.45	108.5	105.8
5.5	52.4	51.5		5.5	71.6	71.2		5.5	71.1	71.5		5.5	159.8	160.2		5.5	75	75.4		5.5	61.3	60.8		5.5	100.6	98.6		5.5	100.8	96.3
5.55	53.7	52.5		5.55	75.5	70.1		5.55	70.1	70		5.55	160.1	161.1		5.55	75.2	76.6		5.55	55.8	59.5		5.55	104.2	101.3		5.55	104.3	106.9
5.6	49.6	51.5		5.6	73.2	71.5		5.6	74.4	73.8		5.6	162.7	159.9		5.6	73.3	74.8		5.6	58.8	63		5.6	99.1	103		5.6	104.6	101.5
5.65	51.5	51.4		5.65	70.1	70.7		5.65	57.9	59.4		5.65	160.4	165.7		5.65	70.8	71.1		5.65	66.4	65.6		5.65	98.2	98.1		5.65	106.8	108
5.7	54.3	51.3		5.7	64.5	64.6		5.7	60.9	57.9		5.7	155.1	151.5		5.7	69.7	69.4		5.7	65.3	62.3		5.7	101.6	101.1		5.7	107.5	109.1
5.75	49.9	44.8		5.75	70.7	69.8		5.75	61.9	61		5.75	160.6	155.4		5.75	72.4	74.1		5.75	71.5	72.1		5.75	94.6	95.4		5.75	108	102.2
5.8	52	50.2		5.8	63.5	62.2		5.8	63.3	63.1		5.8	158.7	161.8		5.8	67.2	66.6		5.8	71.5	71.1		5.8	88.5	84.4		5.8	103.7	103.8
5.85	48.5	50.1		5.85	66.4	67		5.85	57.8	59.9		5.85	158.7	158.2		5.85	65	63.5		5.85	69.4	68.7		5.85	93.4	91.7		5.85	107.2	106
5.9	49.1	49.8		5.9	65.6	66.1		5.9	62.4	60.3		5.9	157.5	156.2		5.9	64.6	63.3		5.9	72.3	69.5		5.9	90.8	89.4		5.9	113.2	110
5.95	47.1	48.5		5.95	64.5	65.8		5.95	62.6	63.2		5.95	157.1	155.4		5.95	62.3	62.5		5.95	70.9	75.5		5.95	93.2	96.3		5.95	114.2	116.8
6	51.9	48.8		6	69.1	70.5		6	56.8	55.7		6	156	160.6		6	70.1	69.3		6	66.8	70.2		6	97.1	97.8		6	122.8	124.1
6.05	54.4	54.6		6.05	68.8	66.5		6.05	57.8	61.3		6.05	166.5	168.7		6.05	71.9	70.2		6.05	67	69.1		6.05	104.6	103.1		6.05	129.6	128.9
6.1	52.2	50.4		6.1	69.2	67.3		6.1	61	57.1		6.1	177.4	177.7		6.1	68.1	69.9		6.1	59.7	57.6		6.1	109.7	111		6.1	135.4	137
6.15	54.6	50.7		6.15	63.8	66.4		6.15	67.8	67.4		6.15	170.1	172.9		6.15	70.6	74.1		6.15	52.2	54.8		6.15	110.1	110.3		6.15	133.6	133.9
6.2	52.5	54.7		6.2	56.3	58.5		6.2	57.6	59.6		6.2	171.7	173.3		6.2	69.8	68.4		6.2	59.5	60.2		6.2	105.6	102.9		6.2	129.4	130
6.25	51.7	51.4		6.25	57.3	57.4		6.25	57	58.6		6.25	171.1	173.8		6.25	64.9	61.2		6.25	58.4	60.5		6.25	105.8	106.6		6.25	127.3	127.5
6.3	55.6	56.7		6.3	58	55.1		6.3	57	58.8		6.3	174.1	173.8		6.3	69	68		6.3	59.2	56.4		6.3	106	106.8		6.3	128.4	128.6
6.35	58.5	57.1		6.35	55.5	56.4		6.35	59.1	60.1		6.35	177.7	181		6.35	66.9	69.2		6.35	54.4	56.3		6.35	111.7	107.6		6.35	140.4	140.6
6.4	60.8	62.3		6.4	57.7	59.3		6.4	62.6	60.8		6.4	181	182.9		6.4	67.9	68.9		6.4	59.9	56.8		6.4	108.6	105.7		6.4	144	143.4
6.45	53.9	54.2		6.45	56.8	57		6.45	60.5	58.9		6.45	188.5	186		6.45	61.4	63		6.45	58.9	60.8		6.45	104.5	107.6		6.45	145.4	152.7
6.5	54.7	53.7		6.5	61.4	59.4		6.5	58.8	58.9		6.5	179.6	181.1		6.5	62.9	65.8		6.5	53.6	54.5		6.5	112.7	112		6.5	153.6	150.3
6.55	53.9	55.5		6.55	54.5	54.8		6.55	57.5	55.6		6.55	180.7	176.1		6.55	65.8	67.8		6.55	52.8	52.3		6.55	111.3	106.3		6.55	139.2	143.2
6.6	51	54.5		6.6	60.1	57.7		6.6	55.2	56.1		6.6	177.3	179.9		6.6	65.6	61.2		6.6	59.5	57.8		6.6	108.9	109.8		6.6	154.6	156.8
6.65	47.7	51.6		6.65	55.3	52.6		6.65	60.8	64		6.65	183.6	180.9		6.65	66.8	64.7		6.65	50.5	55.5		6.65	114.9	117.5		6.65	155.9	157.3
6.7	50.4	51.5		6.7	52.2	53		6.7	61.7	64.5		6.7	192.8	189.3		6.7	70.8	70.3		6.7	55.5	55.9		6.7	125.8	125.5		6.7	157.9	160.3
6.75	53.4	53.8		6.75	54.6	53.9		6.75	63.3	64.3		6.75	192.5	194		6.75	71.7	72.2		6.75	62.2	63.2		6.75	119.2	120		6.75	165.9	167.5
6.8	56.3	58.3		6.8	52.2	52.4		6.8	71	65.7		6.8	203.7	198.5		6.8	71.1	73.7		6.8	58.6	59.8		6.8	120.4	117.9		6.8	168.8	167
6.85	55.9	54.9		6.85	49	52.6		6.85	66.8	67.1		6.85	198.9	197.6		6.85	74.5	77.2		6.85	60.3	62.2		6.85	111.8	109.8		6.85	164.9	167.8
6.9	52.6	50.3		6.9	56	53.9		6.9	68.1	67		6.9	197.9	199.5		6.9	76.5	79.6		6.9	54.6	58		6.9	109.3	105.8		6.9	163	162.9
6.95	52.4	52.6		6.95	54.6	52.2		6.95	64.2	62.2		6.95	191.9	193.5		6.95	77.2	80.7		6.95	58	58.7		6.95	101.3	100		6.95	169.9	164.3
7	54.9	52.6		7	60.5	60.1		7	68.3	67		7	198.2	198.5		7	83.1	83.5		7	54.4	57.4		7	103	100.3		7	154.5	156.9
7.05	53.8	55.6		7.05	58.3	56.7		7.05	68.6	71.1		7.05	200.7	201.6		7.05	90	87.1		7.05	53.8	56		7.05	99.7	98.3		7.05	162.2	162.6
7.1	57.4	57.8		7.1	53.9	52.4		7.1	68.2	67.3		7.1	200.9	199.1		7.1	90	91.6		7.1	55.3	53.5		7.1	100.8	96.6		7.1	166.3	165.2
7.15	54.7	55.7		7.15	59	61.6		7.15	68.6	68.1		7.15	200.3	196.7		7.15	87.5	91.1		7.15	62.6	61.9		7.15	98.9	99.6		7.15	168.6	168.2
7.2	57.6	57.9		7.2	59.1	56.9		7.2	65.9	63.3		7.2	198.4	200.9		7.2	85.6	83		7.2	62.7	61.9		7.2	99	102.4		7.2	171.6	173.2
7.25	56.5	61.1		7.25	57.1	56.3		7.25	64.1	62.6		7.25	199.1	196.3		7.25	78.7	78.3		7.25	57.9	57.8		7.25	100.5	98.7		7.25	177.6	174.9
7.3	57.6	58.6		7.3	59.3	60.6		7.3	52.4	52		7.3	198.2	193.2		7.3	80.2	81.2		7.3	60.8	58.2		7.3	96.7	97.1		7.3	180.9	182.8
7.35	61.3	55.8		7.35	55.8	54		7.35	53.3	55.6		7.35	201.1	203.4		7.35	83.5	85.5		7.35	59.7	58.6		7.35	102.7	100.8		7.35	193.1	188.5
7.4	62.7	61.3		7.4	58.7	53.6		7.4	60.9	61.9		7.4	215.3	216		7.4	83.9	87.4		7.4	63.2	61.2		7.4	104.2	97.5		7.4	198.8	199.6
7.45	64.6	64		7.45	57.3	55.7		7.45	59.5	58.2		7.45	218.9	214.8		7.45	86	83		7.45	64.3	66		7.45	97.5	96		7.45	195.1	192.4
7.5	63.9	61.4		7.5	56.6	55.6		7.5	60.5	63.7		7.5	222.9	224.7		7.5	81.5	79.8		7.5	62.8	60.7		7.5	97.1	93.3		7.5	199.3	198
7.55	63.4	63.7		7.55	52.7	51.8		7.55	59.9	57.8		7.55	225.6	226.8		7.55	82.3	79.8		7.55	56.1	55.1		7.55	97.7	100		7.55	200	199.7
7.6	63.5	62.7		7.6	56	54.1		7.6	56.4	59.7		7.6	227.4	227.7		7.6	81.8	81.7		7.6	51.6	53.1		7.6	93.7	93.7		7.6	199.3	200.7
7.65	61.2	62.9		7.65	53.4	55.9		7.65	61.5	60.3		7.65	224.2	225.7		7.65	79.9	78		7.65	49.5	52.5		7.65	89.4	90.7		7.65	197.3	197.3
7.7	63.6	63.9		7.7	55.5	55.5		7.7	59.7	59.8		7.7	225.5	222.5		7.7	74	74.1		7.7	50.9	49.9		7.7	95.3	94.3		7.7	187.5	188.3
7.75	67.7	67.9		7.75	57	55.7		7.75	62.5	63.8		7.75	215.8	215.6		7.75	76.6	77.9		7.75	52.6	52		7.75	90.8	91.3		7.75	202.8	203.4
7.8	72	71		7.8	58.7	60.2		7.8	67.7	68.5		7.8	215.4	217.9		7.8	74.9	75.4		7.8	50.6	49.6		7.8	97.8	101.2		7.8	209.4	209.9
7.85	71.1	71.7		7.85	60.5	61.6		7.85	55.5	55.5		7.85	217.5	220		7.85	73.7	74.1		7.85	50	49.5		7.85	106.3	104.3		7.85	210.9	207.1
7.9	71.4	68.8		7.9	64.9	63.1		7.9	53.9	52.2		7.9	216.8	223.7		7.9	68.5	69.2		7.9	50.6	50.4		7.9	104.5	109		7.9	208.1	209.9
7.95	67.7	68.5		7.95	66.3	65.2		7.95	52.9	54		7.95	214.5	217.5		7.95	74.5	75.2		7.95	54.4	53.7		7.95	111.5	106.9		7.95	203	206.3
8	68.4	66.1		8	73.7	78.4		8	52	51.2		8	213.3	211.8		8	73.5	74.8		8	52.7	56.2		8	114.2	115.3		8	215.5	218.1
8.05	65.5	59.3		8.05	69.9	72.3		8.05	54.7	53.1		8.05	214.5	218.5		8.05	71.9	71.9		8.05	52.8	48.9		8.05	108.7	107.5		8.05	210.7	214.3
8.1	61.1	63.2		8.1	75.6	78		8.1	57.7	59.9		8.1	224.2	227		8.1	76	74.3		8.1	45.6	49		8.1	111.8	112.8		8.1	222.4	224.3
8.15	61.3	61.4		8.15	71.5	72		8.15	62.2	58.7		8.15	223.7	227.7		8.15	79.8	77.6		8.15	50.2	50.4		8.15	108.7	108.1		8.15	226.1	221.1
8.2	61.2	59.9		8.2	74.7	70.8		8.2	64.8	63.5		8.2	231.1	235.1		8.2	75.3	74.2		8.2	51.2	55.3		8.2	108.2	113.8		8.2	232.7	232.1
8.25	66.1	63		8.25	69.3	70.9		8.25	65.7	62.3		8.25	235.8	233.2		8.25	70.3	69		8.25	58.6	56.4		8.25	114.3	116		8.25	231.7	229.9
8.3	56.8	57.4		8.3	68.4	67.3		8.3	64.7	64.6		8.3	228.8	230		8.3	66.5	66.5		8.3	56.2	52.5		8.3	114.8	116.5		8.3	231.3	229.8
8.35	67.9	63.2		8.35	73	73.4		8.35	61.5	64.3		8.35	226.9	228		8.35	67.2	68.6		8.35	55.4	57.5		8.35	121.9	122.3		8.35	226.4	227.4
8.4	70.2	69.5		8.4	68.8	64		8.4	65.2	67.4		8.4	224.6	226.7		8.4	68.6	68.8		8.4	66.1	69.7		8.4	133.6	131.6		8.4	244	237.3
8.45	76	73.1		8.45	65.6	62.5		8.45	72.4	74.7		8.45	218	218.2		8.45	72.3	71.3		8.45	64.2	65.9		8.45	140.6	138.5		8.45	230.3	233.3
8.5	70.4	71		8.5	59.5	62.1		8.5	70.9	70.9		8.5	236.5	234		8.5	70.9	67.9		8.5	64.7	66.8		8.5	134.9	134.7		8.5	224.3	227.3
8.55	77.2	77.4		8.55	55.5	57.7		8.55	71.1	68.3		8.55	216.4	223.6		8.55	68.9	68.3		8.55	67	67		8.55	138.6	138		8.55	226.6	226.1
8.6	70.2	70.9		8.6	56.7	54.5		8.6	68.7	68.4		8.6	229.2	231.9		8.6	61.5	59.6		8.6	69	68.2		8.6	138.8	136.5		8.6	225.1	228.8
8.65	66	71		8.65	57.2	59.3		8.65	74.3	69.3		8.65	229.4	232.2		8.65	64.6	65.5		8.65	62.8	63.7		8.65	129.5	133.5		8.65	221	222.9
8.7	70.7	67.9		8.7	61.1	59.2		8.7	70	69.9		8.7	232.7	232.8		8.7	58.7	60.9		8.7	58.3	59.7		8.7	148.2	149.6		8.7	226.4	225.3
8.75	67.1	64.5		8.75	61.7	63.5		8.75	69.6	66.5		8.75	228.9	228		8.75	65	61.6		8.75	58.2	59.4		8.75	152.2	152.4		8.75	243.4	240
8.8	63.4	62.8		8.8	62.2	64		8.8	64.8	63.5		8.8	219	225.6		8.8	52	53.8		8.8	58	58.1		8.8	150.4	149.2		8.8	246.3	249.8
8.85	68.6	67.1		8.85	64.5	62.8		8.85	65.2	66.8		8.85	221.4	227.1		8.85	56.6	55.7		8.85	58	56.3		8.85	152	153		8.85	254.3	253
8.9	68.6	68.8		8.9	66.8	68		8.9	65.4	63.4		8.9	212.9	212.2		8.9	54	52.8		8.9	52.4	50.2		8.9	163.6	163.8		8.9	253.2	250.5
8.95	66.3	67		8.95	59.5	61.8		8.95	67.2	69.1		8.95	214.4	208.9		8.95	56.3	56.8		8.95	51.2	57.1		8.95	163.1	160		8.95	256.9	256.9
9	67.4	67.9		9	63.7	65.7		9	67.8	69.7		9	209.9	207.5		9	54.7	52.8		9	51.1	49		9	167.4	167.3		9	257.5	254.4
9.05	68.9	66.8		9.05	69.1	67.7		9.05	67.4	66.5		9.05	211.6	210.8		9.05	49.8	51.5		9.05	52.7	51.9		9.05	173.2	175.7		9.05	273.4	275.6
9.1	71.1	74.3		9.1	64.6	64.9		9.1	66.1	66.9		9.1	212.3	212.7		9.1	46.9	48.3		9.1	48.5	52.2		9.1	175.7	174.5		9.1	279.5	277.8
9.15	70.4	71.8		9.15	58.3	59.8		9.15	71.9	71.9		9.15	212.3	207.9		9.15	46.5	46.2		9.15	55.5	52.9		9.15	185	184.1		9.15	281.9	279.4
9.2	63.1	60.9		9.2	60.1	61.2		9.2	77	72.3		9.2	213.3	210.2		9.2	49.2	45.3		9.2	54	54.3		9.2	188.9	186.6		9.2	285.5	282.9
9.25	68.9	72		9.25	71	72.7		9.25	75.2	76.9		9.25	218.1	213.7		9.25	50.3	52.2		9.25	54.3	54.2		9.25	188.8	189.3		9.25	286.4	291
9.3	69.9	70.9		9.3	67.7	68.1		9.3	67.7	66.9		9.3	205.1	210.6		9.3	50.3	52.7		9.3	55.1	55		9.3	194.5	192.6		9.3	285.9	286.8
9.35	63.1	67.6		9.35	68.1	67.2		9.35	63.6	61.8		9.35	203.9	210.9		9.35	55.6	54.2		9.35	53.4	52.8		9.35	196.1	194.6		9.35	274.1	280.2
9.4	67.2	72.2		9.4	75.3	69.6		9.4	57.9	62.6		9.4	211	213.8		9.4	53.9	52.5		9.4	50.8	48.6		9.4	188.1	186.9		9.4	276.9	278.3
9.45	70.5	73.1		9.45	72.7	71.7		9.45	58.5	55.4		9.45	212.7	215		9.45	51.6	54.5		9.45	47.7	47.1		9.45	185.3	182.8		9.45	274.8	273.7
9.5	69.3	69.7		9.5	71.2	68.6		9.5	63.9	61.2		9.5	217.3	215.5		9.5	55	58.2		9.5	50.6	52.6		9.5	192.9	190.5		9.5	288.8	286.9
9.55	61	62.6		9.55	72.5	74.5		9.55	60.6	64		9.55	222.4	223		9.55	55.3	55.7		9.55	48.2	49.1		9.55	194.4	203.2		9.55	286.1	284.2
9.6	59	61.6		9.6	72.1	78.8		9.6	57.4	57.3		9.6	231.4	229.5		9.6	62.9	58.9		9.6	56.4	51.6		9.6	198.7	197.8		9.6	307.2	302.9
9.65	66	62.6		9.65	76.8	74.8		9.65	54.3	55.4		9.65	231.4	225.9		9.65	59.9	59.1		9.65	57	52.8		9.65	200.1	199.9		9.65	314.8	305.1
9.7	66.1	69		9.7	68.8	70		9.7	52.1	53.1		9.7	232.9	231.5		9.7	58.7	58.7		9.7	57.8	58.7		9.7	198.5	199.6		9.7	307.5	310.5
9.75	62.6	61.3		9.75	70.8	69.3		9.75	54.6	55.7		9.75	231	235.3		9.75	61.9	64.2		9.75	59.1	56.7		9.75	198.2	201.2		9.75	312.5	311.9
9.8	63.9	60.7		9.8	72.8	73.6		9.8	55.9	54.9		9.8	241.5	239.4		9.8	61.8	62.8		9.8	51.5	51.5		9.8	183.9	184.6		9.8	300.4	299.7
9.85	56.7	57.6		9.85	76.9	78.6		9.85	59.1	53.3		9.85	247.3	246.6		9.85	56.7	54.4		9.85	56.4	53.8		9.85	180.5	181.6		9.85	300.8	298.9
9.9	56.7	56.4		9.9	74.1	72.6		9.9	61.2	63.3		9.9	256.7	256.1		9.9	57.1	56.4		9.9	57.9	57.2		9.9	183.7	186		9.9	292.4	284.3
9.95	55.4	56.5		9.95	77.2	76.7		9.95	63.3	61.8		9.95	247.7	243.3		9.95	52.4	54.5		9.95	59.8	62.1		9.95	183.8	186.1		9.95	293.1	294.8
10	55.5	56.7		10	69.8	70.6		10	58.5	61.2		10	248	247		10	53.8	54.8		10	62.9	61.6		10	192.8	186.8		10	301.2	301.2

## Sheet: CMC_13.1uM
	Run_1				Run_2				Run_3				Run_4				Run_5				Run_6				Run_7				Run_8
Time (s)	Total A4 (uM)	Total B4 (uM)		Time (s)	Total A4 (uM)	Total B4 (uM)		Time (s)	Total A4 (uM)	Total B4 (uM)		Time (s)	Total A4 (uM)	Total B4 (uM)		Time (s)	Total A4 (uM)	Total B4 (uM)		Time (s)	Total A4 (uM)	Total B4 (uM)		Time (s)	Total A4 (uM)	Total B4 (uM)		Time (s)	Total A4 (uM)	Total B4 (uM)
0	0.1	0.1		0	0.1	0.1		0	0.1	0.1		0	0.1	0.1		0	0.1	0.1		0	0.1	0.1		0	0.1	0.1		0	0.1	0.1
0.05	33.1	34.6		0.05	32.3	30.5		0.05	36.9	35.9		0.05	34.1	29.9		0.05	35.1	31.1		0.05	30	31.2		0.05	30.6	29.2		0.05	33.6	31.2
0.1	41.7	39.6		0.1	39.3	36.9		0.1	44.2	44.9		0.1	39.1	40.2		0.1	38.6	40.2		0.1	46.3	43		0.1	46.3	47.3		0.1	39.7	39.3
0.15	44.5	43.3		0.15	45.1	43.1		0.15	49.7	50.7		0.15	41.9	44.7		0.15	40.5	43		0.15	46.6	46.1		0.15	46.2	46.3		0.15	42.7	42.7
0.2	48	48.3		0.2	49.4	48		0.2	50	49.2		0.2	51.5	47.4		0.2	42.1	43.5		0.2	50	46.1		0.2	48.6	48.3		0.2	46.4	46.1
0.25	48.1	47.6		0.25	61.2	59.2		0.25	55.6	53.2		0.25	54.1	53.3		0.25	46.2	46.5		0.25	54.5	55.3		0.25	51.5	51.9		0.25	52.6	47.4
0.3	51.3	53.9		0.3	61.4	62.8		0.3	56.5	53.9		0.3	56.4	54.8		0.3	48.9	50.3		0.3	56.7	57.3		0.3	52.7	55.6		0.3	57.8	57.6
0.35	57.9	53.2		0.35	59.1	58.6		0.35	60.4	57.6		0.35	56.8	57.9		0.35	55	55.7		0.35	53.1	52.4		0.35	49.6	50.5		0.35	57.6	57
0.4	54.3	55.4		0.4	54.2	51.2		0.4	65.7	65.4		0.4	59.8	62.8		0.4	58.8	56.5		0.4	58.6	58.2		0.4	55.1	53.9		0.4	58.6	58.8
0.45	57.2	55		0.45	53.1	52.8		0.45	67.2	68.7		0.45	63.2	63.4		0.45	63	60.8		0.45	63.6	61.5		0.45	61.9	57		0.45	60.3	61.4
0.5	53.7	51.9		0.5	53.4	56.2		0.5	68.2	68.6		0.5	64.4	66.2		0.5	62.1	60.7		0.5	62.7	63.1		0.5	54.6	55.8		0.5	61	65
0.55	52.6	55.7		0.55	59.8	58.8		0.55	79.3	79.1		0.55	62.6	62.8		0.55	61.6	59.6		0.55	61.8	60.6		0.55	66.1	61.9		0.55	62.1	66
0.6	49.7	50.3		0.6	59	61		0.6	77	78.4		0.6	59	56.2		0.6	67.4	68.2		0.6	66	66.2		0.6	64.1	61.4		0.6	61.9	62.9
0.65	55.1	56.2		0.65	57.9	57.1		0.65	76.7	77.7		0.65	55.1	57.6		0.65	72.7	75.5		0.65	70.4	72.2		0.65	68.7	70.6		0.65	65.1	65.1
0.7	50.9	54.1		0.7	59.9	60.9		0.7	66.7	67.4		0.7	59.6	60.9		0.7	75.5	77		0.7	73.1	69.3		0.7	64.3	65.3		0.7	65.2	71.3
0.75	56.8	56.9		0.75	57.8	59.6		0.75	62.1	63.2		0.75	57	61.6		0.75	78.4	77.5		0.75	73.5	73.6		0.75	65	65.5		0.75	69.5	68.9
0.8	61.6	62.3		0.8	57.2	57.5		0.8	64.9	67.7		0.8	55.8	53.3		0.8	80.4	76.2		0.8	76.1	78		0.8	65.4	68		0.8	71.2	70.2
0.85	68.6	68.4		0.85	55	53.9		0.85	69.6	67.2		0.85	57	58.1		0.85	76.6	74.6		0.85	77.1	77.6		0.85	63	63.2		0.85	78.5	78.6
0.9	64.9	67.7		0.9	61	60.5		0.9	70.9	72.8		0.9	59.3	59.1		0.9	76.9	75		0.9	82.8	81.2		0.9	67.2	64.2		0.9	75.1	80.4
0.95	71.2	72		0.95	57.9	56.5		0.95	75.6	72.5		0.95	60.8	62.3		0.95	79.4	78.3		0.95	84.4	83.2		0.95	70.8	70.2		0.95	84.2	84.5
1	78.5	76.5		1	55.9	50.6		1	76.1	77.2		1	58.7	57.6		1	71.9	76.1		1	82.1	81.2		1	68.9	67.3		1	82.5	81.1
1.05	87.5	92.1		1.05	55.2	54.5		1.05	71.6	72		1.05	60.9	61.6		1.05	81.1	81.6		1.05	80.9	80.6		1.05	62.7	62.6		1.05	80.7	77
1.1	87.6	88.1		1.1	54.2	53.3		1.1	79.1	78.3		1.1	60.9	64.6		1.1	83.9	84.2		1.1	81.9	82.4		1.1	64.6	64.3		1.1	83.4	80.4
1.15	85.9	86.3		1.15	57.4	61.8		1.15	81.2	79.7		1.15	57	57.2		1.15	83.3	83		1.15	82.5	81.4		1.15	68.5	71		1.15	93.4	96.5
1.2	89	89.3		1.2	63.1	63.3		1.2	79	77.6		1.2	64.3	66.1		1.2	90.4	86.4		1.2	85.9	85.9		1.2	69.9	73.5		1.2	93.3	93.8
1.25	92.2	91.7		1.25	68.4	69.5		1.25	83.6	83.5		1.25	68.9	73.4		1.25	87.7	85.2		1.25	93.7	91.7		1.25	78.9	78.6		1.25	87.2	89.6
1.3	92.3	91.8		1.3	75.4	73.3		1.3	80.6	80.9		1.3	71.2	69		1.3	79.9	83.3		1.3	91.4	92.1		1.3	80.1	79.6		1.3	81	79.4
1.35	85.6	85.1		1.35	77.5	78.7		1.35	84.9	89.3		1.35	73.5	71		1.35	87.3	86.2		1.35	90.2	91.2		1.35	81.9	77.9		1.35	85.2	86.7
1.4	84.3	85.3		1.4	74.6	77.4		1.4	84	82.8		1.4	72.2	68.4		1.4	88.8	90.8		1.4	92.7	95.6		1.4	75.8	76.6		1.4	90.2	91.4
1.45	84.6	78.5		1.45	77	78.5		1.45	83.5	83.4		1.45	66.9	63.6		1.45	95.2	96.7		1.45	94.9	96.2		1.45	68.8	70.2		1.45	93	91.5
1.5	82.3	77.4		1.5	77.4	78.2		1.5	83.2	82.4		1.5	68.9	68.6		1.5	96.2	99.3		1.5	92.6	94.2		1.5	64.9	66.4		1.5	92.7	91.1
1.55	83.3	83.2		1.55	71.5	69.8		1.55	91.6	87.1		1.55	72.2	75.3		1.55	94.9	94.8		1.55	87.2	87.1		1.55	66.1	64.1		1.55	93.5	94.2
1.6	92.5	91.3		1.6	63.2	63.4		1.6	86.5	85		1.6	66.5	67.7		1.6	99	98		1.6	93	94.2		1.6	62	61.6		1.6	99.3	97.6
1.65	95.1	95.6		1.65	60.2	60.9		1.65	78.3	80.7		1.65	62.4	65.7		1.65	103.2	101.5		1.65	98.1	96.2		1.65	70.4	69.7		1.65	93.3	89.6
1.7	97.4	98.5		1.7	59.2	57.9		1.7	81.1	80		1.7	61.2	61		1.7	97.8	100.7		1.7	96	98.3		1.7	71.9	73.3		1.7	95.7	89.9
1.75	97.5	97.2		1.75	56.5	60.9		1.75	83.9	81.6		1.75	63	63.9		1.75	96.4	96.1		1.75	102.8	101.6		1.75	78.9	79		1.75	97.6	97.4
1.8	95.4	98.6		1.8	59.1	57.6		1.8	90.8	82.5		1.8	66.7	68.7		1.8	102	103		1.8	105.3	104.4		1.8	85.1	82.2		1.8	95.8	92.9
1.85	98.4	99.8		1.85	57.6	59		1.85	83.1	83.4		1.85	70.7	74.5		1.85	112.6	110.4		1.85	106.7	108.3		1.85	85.7	87.3		1.85	94.4	99.3
1.9	94.4	98.5		1.9	53.8	53.9		1.9	90.6	89.8		1.9	69.9	70.6		1.9	114.7	111.8		1.9	102.8	106		1.9	90.9	87.7		1.9	103.3	99.9
1.95	95.6	96.4		1.95	55.5	52.2		1.95	84.4	86.4		1.95	66.1	64.4		1.95	118.1	116.5		1.95	98.9	98.5		1.95	94.1	93.6		1.95	100.3	100.4
2	97.4	98.3		2	57.9	54.9		2	88.6	85.4		2	62.3	62.5		2	113.4	112.8		2	104.5	107.7		2	106.8	102.7		2	105.4	104.5
2.05	97.6	98.4		2.05	58.2	59.9		2.05	88.7	91.1		2.05	61.5	62.9		2.05	114.9	117.9		2.05	101.5	104.4		2.05	106.1	109.4		2.05	107.2	102.7
2.1	106.9	104.6		2.1	62.4	58.8		2.1	92.8	89.4		2.1	60.1	59.4		2.1	115.8	117.4		2.1	101	100.7		2.1	108.1	108.8		2.1	107.7	109.5
2.15	101.8	105.1		2.15	55.9	55.5		2.15	94.9	94.8		2.15	55.3	53.9		2.15	114.8	111.5		2.15	106.1	102.1		2.15	101.4	102.4		2.15	117.9	119.4
2.2	109.6	106.5		2.2	61.6	60.3		2.2	102	103.1		2.2	53.3	55.6		2.2	115.5	113.8		2.2	99.3	100		2.2	96.8	98.6		2.2	122.8	118.9
2.25	111	107.7		2.25	57.4	54		2.25	115.8	115.1		2.25	58.4	57		2.25	121.2	122.7		2.25	100.7	104.1		2.25	107.3	107.1		2.25	117.3	118.2
2.3	123	123.9		2.3	64	60		2.3	114.5	114.9		2.3	55.8	57		2.3	129.3	136.2		2.3	113.4	108.8		2.3	110.3	111.5		2.3	119.4	115.7
2.35	114.8	115.8		2.35	61.8	62.5		2.35	115.7	115.3		2.35	60.2	59.7		2.35	133.7	135.8		2.35	110.3	111.2		2.35	108	107.7		2.35	119.6	118.5
2.4	111	113.3		2.4	55.2	58.8		2.4	120.1	123		2.4	62.6	62.4		2.4	143.2	142.5		2.4	115.2	114		2.4	102.3	106.1		2.4	105.9	109.1
2.45	114.8	114.7		2.45	58.5	58.8		2.45	120.9	121.5		2.45	61	61.3		2.45	129.8	127.8		2.45	117.1	121.8		2.45	96.5	97.9		2.45	112.1	114.8
2.5	120.8	120.2		2.5	58.7	60.8		2.5	124.8	125.9		2.5	59.8	60.3		2.5	129.1	127.3		2.5	119.1	123.9		2.5	96.7	89.8		2.5	115.4	118.4
2.55	111.8	113.8		2.55	66.2	70.6		2.55	130.2	129.5		2.55	59.8	59.9		2.55	134.1	131.4		2.55	118.1	124.6		2.55	94.9	94		2.55	114.9	118
2.6	117	120.8		2.6	75.2	77.3		2.6	133.1	134.8		2.6	68.6	70.1		2.6	133.1	134.3		2.6	122.1	124.1		2.6	87.2	88.8		2.6	119.5	118.9
2.65	115.6	117.2		2.65	76.6	76.4		2.65	137.5	138.3		2.65	71.7	73.4		2.65	131.7	134		2.65	135.4	134.5		2.65	94.3	93.5		2.65	125.3	121.4
2.7	118.9	119.1		2.7	69.3	70.8		2.7	135.3	136.6		2.7	73.9	77.5		2.7	131	132.4		2.7	133.1	138.8		2.7	92	88.2		2.7	125.6	131.1
2.75	110.8	110.5		2.75	70.9	68.1		2.75	135.7	134		2.75	79.9	79.2		2.75	143.3	143.8		2.75	140.4	138.6		2.75	97.3	94.3		2.75	139.3	139.4
2.8	110.3	110.4		2.8	74.2	76.4		2.8	138.6	137.5		2.8	79.5	81.2		2.8	150.2	152.3		2.8	154.2	155.7		2.8	98.5	99.4		2.8	146.7	145.5
2.85	123.7	124.5		2.85	73.3	74.3		2.85	136.2	141.4		2.85	85.6	88.1		2.85	157.9	158.5		2.85	153.4	161.2		2.85	105.2	105.1		2.85	146.8	152.1
2.9	127.5	129		2.9	76.5	79.5		2.9	139.3	141.3		2.9	87.9	90.2		2.9	162.4	163.3		2.9	156.5	150.7		2.9	98.3	98		2.9	154.8	153
2.95	127.8	130		2.95	84.9	85.7		2.95	139.8	142.2		2.95	104.8	102.9		2.95	153	155.6		2.95	158.3	156.4		2.95	103.9	106.1		2.95	161.4	160.3
3	135.6	132.8		3	88.9	88.3		3	142.8	141.5		3	107.4	108.5		3	154.6	159.8		3	154.5	159.2		3	112.4	112		3	159.3	158.4
3.05	127.4	129.6		3.05	88	83.4		3.05	149.4	151.6		3.05	115.9	114.4		3.05	164.8	163.6		3.05	158.2	157.9		3.05	111.8	112		3.05	168.1	168.7
3.1	129.9	131.7		3.1	90.8	92.8		3.1	157.3	156.1		3.1	120.5	120.4		3.1	166.9	168.3		3.1	160.6	161.1		3.1	119.5	119.1		3.1	173.5	166.8
3.15	138	136.9		3.15	97.5	93.9		3.15	162.7	166.4		3.15	130.6	129.7		3.15	172.6	175.6		3.15	159.1	155.5		3.15	122.5	126.6		3.15	174.4	172.4
3.2	142.8	138.9		3.2	97.2	97.5		3.2	183.2	183.1		3.2	131.1	128.4		3.2	181.8	176.7		3.2	161.8	163.3		3.2	119	120.5		3.2	163.9	162.3
3.25	144.2	149.7		3.25	92.5	91.8		3.25	190.6	190.8		3.25	133.3	134.1		3.25	187.6	185.4		3.25	173.4	172.4		3.25	122.2	119.7		3.25	167.7	164.9
3.3	154.4	149.2		3.3	97	94		3.3	187.3	188.4		3.3	135.5	136.7		3.3	197.2	194.4		3.3	171.7	170.6		3.3	123.5	126.3		3.3	161.5	159.4
3.35	153.9	157.2		3.35	103	100		3.35	188.2	192.2		3.35	134.4	136.7		3.35	189.7	189.8		3.35	174.6	172.3		3.35	122.6	120.5		3.35	165.9	163.7
3.4	156.5	159.9		3.4	99.3	98.9		3.4	189.1	185.4		3.4	132.8	128		3.4	189.3	190.7		3.4	177.9	174.1		3.4	130.6	133.2		3.4	168.8	164.3
3.45	167.5	162.3		3.45	102.7	100.2		3.45	194.8	191.1		3.45	135.8	138.2		3.45	205.4	200.8		3.45	179.7	179.2		3.45	128	129		3.45	181.4	183.9
3.5	162.2	168.3		3.5	112.1	108.1		3.5	189.8	191.9		3.5	141.3	144.6		3.5	209.1	211.1		3.5	173.8	177.9		3.5	129.8	127.1		3.5	192.1	190.8
3.55	175.3	175.6		3.55	114.1	111.5		3.55	194.4	191.6		3.55	146.2	148.4		3.55	215.6	213.9		3.55	184.3	186.5		3.55	131	132.9		3.55	201.9	197.9
3.6	170.5	170.9		3.6	109.5	112.4		3.6	206.2	205.1		3.6	146	145.4		3.6	221.3	215.3		3.6	196.1	199.3		3.6	132.1	130.6		3.6	207	204.6
3.65	178	170.3		3.65	120.8	117.9		3.65	208.3	204.4		3.65	152.5	152.1		3.65	226.9	228.5		3.65	196.4	201		3.65	138.7	139.3		3.65	204.3	203.5
3.7	180.7	181.2		3.7	117.8	119.3		3.7	206.7	204.8		3.7	156.1	161.1		3.7	224.2	229.7		3.7	200.5	200.3		3.7	133	136.5		3.7	199.1	200.6
3.75	182.7	182		3.75	114.2	117.5		3.75	205	205.5		3.75	164	170.8		3.75	232.1	231		3.75	207.6	208		3.75	138.5	139.8		3.75	207.5	206.9
3.8	177.9	178.1		3.8	115.1	111.9		3.8	207.5	210.4		3.8	173.1	170.4		3.8	229.4	227.7		3.8	215.5	221.3		3.8	140.6	144.7		3.8	212.4	212.6
3.85	183.2	180.5		3.85	122.4	121.4		3.85	212.1	207.9		3.85	180.2	178.6		3.85	231	234.1		3.85	223.8	223.1		3.85	147.8	152.8		3.85	211.5	214.4
3.9	191	187.8		3.9	114.5	116.6		3.9	216	213.5		3.9	175.5	176.5		3.9	246.4	244.6		3.9	235.8	236.1		3.9	145.4	144.9		3.9	216.5	215.1
3.95	190.2	188.5		3.95	104.4	104.9		3.95	221.4	223		3.95	170.8	172.9		3.95	244.8	239.9		3.95	239.4	235.1		3.95	144.3	148.8		3.95	221.5	221.5
4	196.9	191.6		4	105	107.4		4	225.5	228.5		4	177.2	183.8		4	240.7	240.6		4	240.9	242.4		4	155.4	152.8		4	223.8	226.4
4.05	193.5	193.9		4.05	113.7	116.1		4.05	232.3	233.3		4.05	173.9	174.7		4.05	234.5	239.9		4.05	237.5	235.8		4.05	161.2	158		4.05	228.3	228.2
4.1	197.6	203.2		4.1	111.6	114.4		4.1	242.4	246.1		4.1	176.8	178.7		4.1	250.2	245.2		4.1	240.9	239.7		4.1	174.7	175		4.1	230.9	233.6
4.15	209.8	204.5		4.15	114.4	116.3		4.15	247.3	249.4		4.15	189.3	188.2		4.15	244.5	248.1		4.15	245.9	242.8		4.15	184.1	181.3		4.15	237.1	233.9
4.2	204.8	202.6		4.2	113.3	112.7		4.2	242.2	238.4		4.2	190	194		4.2	246.8	246.9		4.2	259.1	254.5		4.2	187.5	186.2		4.2	234.4	233.9
4.25	217.6	216.1		4.25	122.4	123.4		4.25	240.2	242.4		4.25	199.6	198.3		4.25	255.3	251.5		4.25	260.6	262.3		4.25	185	185.6		4.25	229.7	230.7
4.3	221.8	218.4		4.3	132.1	131		4.3	246.4	244.8		4.3	196.5	199.3		4.3	253.4	256.6		4.3	271.8	272.8		4.3	196.4	196.8		4.3	231.5	231.9
4.35	217.3	214.2		4.35	136.6	135.3		4.35	254.3	254		4.35	203.5	204.1		4.35	260.1	260.4		4.35	288.5	281.3		4.35	191.3	189.3		4.35	228.1	228.1
4.4	224.5	219.5		4.4	135.1	133.5		4.4	252.8	252.8		4.4	208.4	207.2		4.4	258.7	258.4		4.4	287.3	291.8		4.4	192.3	197.1		4.4	239.2	233.1
4.45	229.4	226.5		4.45	137.3	135.1		4.45	241.2	245.1		4.45	210.8	213		4.45	260.7	262.7		4.45	293.3	294.6		4.45	191.9	187.3		4.45	224.1	228.2
4.5	227	228.6		4.5	139	136		4.5	231.2	230.9		4.5	218	218.9		4.5	266.7	268		4.5	297.5	297.2		4.5	191.6	193.3		4.5	238.4	239.6
4.55	229.7	236.1		4.55	143.2	147.7		4.55	248.2	246.4		4.55	237.2	233		4.55	272.1	266.1		4.55	293.8	293.1		4.55	188.6	188.2		4.55	260.1	261.6
4.6	231.9	230.2		4.6	142	145.2		4.6	255.6	253		4.6	242.6	241.1		4.6	279.5	280.7		4.6	302.7	304.7		4.6	200.1	198.3		4.6	269.4	269.5
4.65	242.2	244.4		4.65	147.1	148.7		4.65	250.3	254		4.65	246.3	246.8		4.65	289.8	286.7		4.65	310.6	313.1		4.65	205.7	203		4.65	272.4	265.7
4.7	243.3	241.8		4.7	150.6	155.4		4.7	256.7	259.4		4.7	240.4	243.9		4.7	288	290.3		4.7	319.6	320.4		4.7	198.6	199.1		4.7	277.6	279.8
4.75	244.4	245.6		4.75	157.6	160.4		4.75	266.8	267.5		4.75	259.3	260.5		4.75	313.2	312.8		4.75	337.6	335		4.75	195.2	197.7		4.75	276.2	276.4
4.8	259.6	252.6		4.8	157.4	160.1		4.8	262.9	263.6		4.8	264.2	261		4.8	324.1	318.1		4.8	352.7	353.1		4.8	193.2	194.4		4.8	275.4	279.1
4.85	255.3	258.6		4.85	153	151.5		4.85	263.4	269.6		4.85	278.2	278.8		4.85	321.9	322.7		4.85	357	360.3		4.85	198.4	192.8		4.85	277.6	277.7
4.9	254	251.2		4.9	156	156.5		4.9	270.6	271		4.9	282.6	282.5		4.9	337	336		4.9	350.9	348.7		4.9	190.2	196.1		4.9	297.4	299.5
4.95	259.2	254.4		4.95	154.7	152.4		4.95	279.8	281.7		4.95	293.2	289.9		4.95	329	335.7		4.95	358	359.4		4.95	199.6	201.4		4.95	287.9	289.3
5	260.1	257		5	158.9	158		5	290.5	292.4		5	297.8	298.4		5	342.9	346.3		5	360.3	355.7		5	187.3	194		5	291.8	288.7
5.05	270.5	269.2		5.05	162.7	166.1		5.05	299.7	297.6		5.05	291.6	300.7		5.05	350.4	351.4		5.05	352.6	348.2		5.05	199.7	200.4		5.05	295.4	294
5.1	268.9	273.8		5.1	164.2	165.4		5.1	302.7	302.9		5.1	291.4	297.5		5.1	358	358.3		5.1	358.2	360		5.1	200.6	196.7		5.1	301.9	301.3
5.15	268.2	270.3		5.15	166	171.2		5.15	305.7	310.4		5.15	299	296.5		5.15	369.6	371.8		5.15	350.3	355.1		5.15	201.9	200.6		5.15	315	314.7
5.2	260.2	267		5.2	180.2	180.1		5.2	311.4	309.1		5.2	303.8	304.5		5.2	369.3	371.7		5.2	359.6	360.7		5.2	210.3	212.7		5.2	320.8	318.6
5.25	250.6	256.2		5.25	185.4	184.8		5.25	302.2	299.5		5.25	310.2	307.6		5.25	369.1	371		5.25	364.7	368		5.25	222.7	221.9		5.25	318.6	321.6
5.3	255.3	258.9		5.3	178.5	181		5.3	293.7	296.6		5.3	308.5	310.9		5.3	383.1	379.3		5.3	364.5	362.8		5.3	224.8	223.1		5.3	313.9	313.5
5.35	266.9	266.7		5.35	181.1	184.3		5.35	298.1	297.2		5.35	316	326.1		5.35	400.5	398.7		5.35	377.7	380		5.35	225.3	227.8		5.35	314.2	319.5
5.4	269.1	263.1		5.4	181.9	177.3		5.4	307.7	301.9		5.4	318.8	324.2		5.4	400.9	401.5		5.4	390.6	390.8		5.4	233.2	238.6		5.4	316.3	318
5.45	277.6	281.4		5.45	180.8	178.7		5.45	318	314.2		5.45	312.5	309.9		5.45	407.6	409.9		5.45	400.8	400.8		5.45	236.8	234.1		5.45	316.8	322.4
5.5	280.8	283.3		5.5	169.8	167.7		5.5	318.4	318.3		5.5	320.9	321.7		5.5	434.2	422.4		5.5	411.7	409.7		5.5	227.8	230.3		5.5	328.6	328.6
5.55	289.8	288.2		5.55	172.9	176.6		5.55	318	316.8		5.55	324	322.7		5.55	428.5	433		5.55	416.2	419.5		5.55	233.9	231.5		5.55	330.2	326.4
5.6	292.7	294.5		5.6	177.1	176.9		5.6	336.3	340.9		5.6	326.7	327.4		5.6	440.8	439.3		5.6	421.4	424		5.6	241.7	242		5.6	323.4	328
5.65	298.7	299.6		5.65	186.3	188.8		5.65	349.1	350.3		5.65	327.8	326.3		5.65	426.5	430.5		5.65	436.2	438.1		5.65	255.9	254.3		5.65	338.6	336.7
5.7	306.5	311.7		5.7	196.7	198.1		5.7	362.4	369.2		5.7	329	335.9		5.7	428.1	437.6		5.7	446.5	443.2		5.7	255.3	254.2		5.7	346.8	342.3
5.75	320.6	321.8		5.75	194.8	193.2		5.75	369.1	371.6		5.75	344.5	345		5.75	447.7	438.1		5.75	443.9	445.8		5.75	260.9	259.5		5.75	343.9	348.6
5.8	322.8	324		5.8	205.1	200		5.8	370.4	367.1		5.8	357.3	353.8		5.8	450.3	458.4		5.8	448.3	453.6		5.8	259.4	256.4		5.8	363.5	368.1
5.85	327.2	334		5.85	209	202.3		5.85	380.9	383.5		5.85	364.1	364.7		5.85	459.1	457.1		5.85	441.9	443.5		5.85	250.9	253		5.85	367.8	366.7
5.9	336.1	335.5		5.9	208.8	204.4		5.9	382.8	378.5		5.9	363	366.3		5.9	464.9	466.3		5.9	445.8	443.7		5.9	250.3	249.9		5.9	375.5	378.5
5.95	347.3	347.7		5.95	201.7	204		5.95	392	383.5		5.95	373.1	375.1		5.95	476	476.5		5.95	450.8	452.7		5.95	261.3	269.1		5.95	373.8	373.9
6	363.9	366.2		6	200.6	201.1		6	390.4	392.4		6	378.4	382.8		6	484.3	490.5		6	459.8	460.3		6	272.6	272.3		6	379.3	381.1
6.05	382.3	385.9		6.05	204.2	206.5		6.05	409	409.7		6.05	392.2	394.5		6.05	501	496.3		6.05	455.2	456.4		6.05	265	270.5		6.05	388	387.1
6.1	395.4	394		6.1	203.1	199.4		6.1	405.7	399.5		6.1	408.6	409.2		6.1	515.8	514.3		6.1	461.4	466.5		6.1	268.7	265.5		6.1	395.2	402.1
6.15	405.5	405		6.15	202.2	201.3		6.15	401.6	403.3		6.15	424.7	423.4		6.15	534.7	539.1		6.15	471.8	472.8		6.15	267	271		6.15	398.2	403.2
6.2	411.9	411.5		6.2	212	206.3		6.2	409.1	408.5		6.2	430.3	431.1		6.2	548.5	551.3		6.2	472	470.4		6.2	271.1	274.2		6.2	399.1	405.2
6.25	429.9	428.1		6.25	218.1	218.8		6.25	412	412.8		6.25	437.7	442.7		6.25	546.3	547.7		6.25	487.9	485.7		6.25	278.5	281.4		6.25	416.6	411.4
6.3	437.1	441.1		6.3	226.2	227.9		6.3	412.2	423.7		6.3	452.1	448		6.3	548.9	546.5		6.3	493.7	492.5		6.3	290.9	284.1		6.3	427.7	422.9
6.35	457.3	448.8		6.35	230.7	228.4		6.35	421.6	417.6		6.35	463	466		6.35	554.9	563.1		6.35	493.2	493.2		6.35	286.1	287.8		6.35	436.7	435.1
6.4	451	449.4		6.4	229.5	233.3		6.4	426.8	424.2		6.4	479.7	482.7		6.4	578.7	573		6.4	508.4	512		6.4	293	303.1		6.4	445.8	442.8
6.45	453	449		6.45	229.6	228.2		6.45	444.4	437.1		6.45	495.3	493.2		6.45	580	585.1		6.45	526.2	532.4		6.45	305.9	308.9		6.45	462.9	458.6
6.5	459.1	458.5		6.5	240.4	237.6		6.5	459.6	459.5		6.5	501.1	505.5		6.5	589.5	592.9		6.5	540.8	536.3		6.5	316.3	318.3		6.5	451.6	454.5
6.55	487.1	478.9		6.55	246.7	247.7		6.55	472.1	483.3		6.55	521	518.2		6.55	590	588.3		6.55	543.4	546.2		6.55	312.2	313.2		6.55	464.7	463.2
6.6	482.9	480		6.6	253	253.3		6.6	489.8	489.9		6.6	523.7	525.2		6.6	582.8	588		6.6	548.5	547.4		6.6	331	328.4		6.6	459.6	464.3
6.65	476.6	486.4		6.65	259.6	255.7		6.65	509.3	497.6		6.65	524.9	520.4		6.65	606.4	613.2		6.65	554.7	552		6.65	337.9	333.1		6.65	457.8	458.7
6.7	493	488.1		6.7	264.2	268.3		6.7	516	516.9		6.7	538.4	532.2		6.7	603.4	608.9		6.7	563.4	561.5		6.7	330.3	333		6.7	455.7	457.8
6.75	493.3	500.5		6.75	273.6	270		6.75	534	534		6.75	555.4	550.1		6.75	611.5	609.3		6.75	560.5	562.6		6.75	335.9	340		6.75	451.1	449.7
6.8	525.4	518.4		6.8	278.7	281.3		6.8	548.5	546.3		6.8	571.6	569.2		6.8	618.2	618.3		6.8	569.8	571.3		6.8	354.4	349.2		6.8	466.3	473.8
6.85	543.8	539.8		6.85	271.7	273.9		6.85	569.3	570.9		6.85	578.1	580.6		6.85	609.5	620.9		6.85	570.2	573.6		6.85	347.8	350.2		6.85	488.2	487.8
6.9	552.4	539.2		6.9	267.9	268.1		6.9	603.8	608.8		6.9	581.5	578.5		6.9	626.5	630.6		6.9	590.9	584.4		6.9	363.9	363.9		6.9	510.8	503.3
6.95	556.7	551.7		6.95	275.5	271.5		6.95	619.4	618.8		6.95	583.1	588.4		6.95	629.3	633		6.95	591	591.2		6.95	362.4	359.9		6.95	524.3	525.3
7	572.6	568.2		7	281.7	278.6		7	644.7	648.3		7	585.8	589.1		7	659.9	659.4		7	588.6	596		7	355.1	357.6		7	523.8	523
7.05	584	582.4		7.05	283.7	284.8		7.05	655	650.3		7.05	597.2	593.5		7.05	685.1	684.2		7.05	604.1	620.1		7.05	370.6	370.4		7.05	547.5	546.1
7.1	587.5	588.3		7.1	281.5	282.9		7.1	677.3	676		7.1	598.9	602.6		7.1	680.8	675.5		7.1	617.1	620.3		7.1	369.8	372.4		7.1	558.3	557.3
7.15	597	597.1		7.15	270.3	265.4		7.15	701.5	697.9		7.15	611.6	609.9		7.15	680.8	683.2		7.15	632.5	633.3		7.15	392	389.6		7.15	560	555.2
7.2	601.5	601.2		7.2	269.7	272		7.2	711.5	708.9		7.2	622.7	622.5		7.2	690.8	690.2		7.2	630.7	632.8		7.2	400.4	387.3		7.2	565	567
7.25	601	599.9		7.25	270.8	272.2		7.25	715.5	717		7.25	629.5	625.9		7.25	711.8	707.8		7.25	655	651.4		7.25	387.6	389.7		7.25	575.9	573.3
7.3	620.2	621.6		7.3	281	279.2		7.3	742.1	743.1		7.3	627.9	623		7.3	721.3	723.2		7.3	669.5	675.8		7.3	399.2	395.6		7.3	594	581.8
7.35	641.4	650.4		7.35	276.1	272.6		7.35	747.3	753.9		7.35	630.3	629.8		7.35	731.1	730.4		7.35	674.4	680		7.35	397	394.6		7.35	600.6	598.3
7.4	637.3	642.9		7.4	267	270.2		7.4	754	751.6		7.4	615	616.2		7.4	731.3	734.9		7.4	680.6	680		7.4	409.1	407.3		7.4	601.8	601.8
7.45	660	666.4		7.45	272.8	269.5		7.45	772.1	774.5		7.45	621.6	617.1		7.45	745.6	740.3		7.45	695	699.5		7.45	411	408.4		7.45	617.7	619.5
7.5	687.6	678.4		7.5	273.5	274.7		7.5	764.8	768.4		7.5	616.3	609.9		7.5	760.4	753.3		7.5	720.5	720.5		7.5	400.5	394.5		7.5	631	632
7.55	692.6	687		7.55	272.7	278.2		7.55	806.7	811.8		7.55	617.9	619.2		7.55	762.3	765.9		7.55	732.7	733.8		7.55	412.4	408.4		7.55	627.4	626.7
7.6	705.8	696.6		7.6	276.1	273.4		7.6	814.3	812.5		7.6	623.7	626.7		7.6	771.5	771.9		7.6	744	752.1		7.6	421.9	417.5		7.6	642.1	638.4
7.65	716.1	719.5		7.65	282.3	283.9		7.65	808.4	812.9		7.65	623.6	623.8		7.65	792.7	791.1		7.65	760.7	759		7.65	422.8	427		7.65	655.9	647.7
7.7	731.3	734.7		7.7	292.3	290.2		7.7	815.8	821.4		7.7	628.1	636.4		7.7	806.8	806.4		7.7	749.8	747.7		7.7	432.4	437.7		7.7	664.6	660
7.75	728	730.3		7.75	298.9	298.4		7.75	828.4	819.4		7.75	640.7	644.8		7.75	828.6	829		7.75	759.8	752.1		7.75	438.6	436.2		7.75	651.7	664.2
7.8	721.7	732.6		7.8	306.2	302.4		7.8	826.2	823.7		7.8	644.9	642.7		7.8	834.1	830.7		7.8	774.7	767.4		7.8	436.7	439.7		7.8	657.1	657.3
7.85	723.6	727		7.85	318.3	316.5		7.85	826.7	822.3		7.85	657.9	661		7.85	840.1	851.4		7.85	777.1	770.4		7.85	441.7	444.3		7.85	671	661.4
7.9	722.7	726.5		7.9	324	324.6		7.9	829.1	833.8		7.9	666.5	664.8		7.9	852.3	858.2		7.9	788.8	793.2		7.9	449.4	449.1		7.9	669.7	668.4
7.95	740	739.3		7.95	342.4	343		7.95	831.8	833.2		7.95	662	667.4		7.95	858.9	863		7.95	804.4	809.5		7.95	451.8	447.4		7.95	666.5	673.3
8	756.4	751.2		8	345.1	339.2		8	835.6	840.9		8	658.1	653		8	861.8	868		8	812.6	811.7		8	465.5	468.6		8	674.1	677.4
8.05	753.6	749.5		8.05	344.6	352.9		8.05	855.5	846.9		8.05	670.1	666.7		8.05	887.6	891.4		8.05	825.5	833		8.05	478.1	476.3		8.05	680.4	690.8
8.1	762.2	754.9		8.1	349.4	351.4		8.1	848.1	850.8		8.1	658.1	664.6		8.1	898.7	893.6		8.1	835.2	838.1		8.1	486.9	490		8.1	696.3	693.5
8.15	776.2	772.5		8.15	348.4	350.1		8.15	859	853.5		8.15	660.3	653.1		8.15	903.3	897		8.15	839.5	849		8.15	494.1	493.5		8.15	702.2	702.6
8.2	783.9	787.5		8.2	351.9	354.3		8.2	872.5	860.5		8.2	661.3	659.8		8.2	908.2	903.5		8.2	862.1	863.7		8.2	495.3	503.8		8.2	728.8	720.7
8.25	777	778.5		8.25	365	360.2		8.25	873.4	865.3		8.25	672.3	666		8.25	911.4	907.7		8.25	882.6	891.3		8.25	509.1	508.6		8.25	729.4	736.3
8.3	807.6	807		8.3	365.3	365.1		8.3	889.6	887.3		8.3	676.3	674.1		8.3	930.5	923.1		8.3	907.7	907.1		8.3	504.2	507.6		8.3	732.9	727.7
8.35	814.1	811.7		8.35	361.5	369.7		8.35	895.6	896.5		8.35	675.8	675.2		8.35	952.2	948		8.35	926.3	922		8.35	496.7	493.1		8.35	729.4	731
8.4	830.2	830.6		8.4	365.3	374.6		8.4	899.9	895.3		8.4	695.7	699.3		8.4	949.1	947.2		8.4	929.8	926.5		8.4	508.8	510.1		8.4	741.6	743.7
8.45	833.5	821.7		8.45	378.2	369.2		8.45	909.4	915.5		8.45	705.4	703.3		8.45	977.6	974.4		8.45	920.6	928.6		8.45	527.7	523.3		8.45	755	762.2
8.5	843.9	843.7		8.5	378.7	385.7		8.5	904	908.5		8.5	710.1	709.3		8.5	991	986.9		8.5	939.6	943		8.5	548.8	549.5		8.5	766.4	762.1
8.55	865.1	863		8.55	383.4	383.2		8.55	929.2	926.3		8.55	711	711.1		8.55	993	989.1		8.55	962.4	964.3		8.55	549.5	555.1		8.55	772.2	773.8
8.6	868.6	875		8.6	373.6	375.9		8.6	940.2	942.3		8.6	704.2	701.5		8.6	1014.6	1009		8.6	959.5	957		8.6	550.5	552.5		8.6	764.6	774.9
8.65	883.4	875.5		8.65	365.6	369.9		8.65	945.8	952.3		8.65	709.4	710.7		8.65	1050.5	1046.3		8.65	969.4	975.4		8.65	558.7	559		8.65	798.9	791.1
8.7	898.9	889.9		8.7	377.2	375.5		8.7	936.2	942.7		8.7	717.1	719.8		8.7	1056.9	1055.6		8.7	978	979.7		8.7	561.2	556.4		8.7	815.2	814.3
8.75	898.2	908.7		8.75	379.5	374.2		8.75	946	952.6		8.75	727.2	730.8		8.75	1071.3	1069.5		8.75	994.3	1002.2		8.75	563.8	564.6		8.75	831.6	822.9
8.8	903.7	909.1		8.8	393.1	389.2		8.8	960.2	963.7		8.8	737.3	736.2		8.8	1092.5	1091.3		8.8	1007.3	1001.2		8.8	575.5	574.8		8.8	832.8	831.3
8.85	914.3	920.9		8.85	402.9	402		8.85	983.2	975.8		8.85	752.8	753.6		8.85	1099.4	1098.7		8.85	1015.9	1022.2		8.85	586.9	586.4		8.85	835.7	841.2
8.9	927.2	930.3		8.9	415.1	418.5		8.9	1000.7	1005.6		8.9	769.1	767.6		8.9	1116.2	1115.9		8.9	1011.4	1022.8		8.9	589.2	589.4		8.9	843	834.6
8.95	953.3	961.1		8.95	431.3	432.7		8.95	1005.7	1011.6		8.95	768.4	782.7		8.95	1146.7	1144.7		8.95	1006.8	1009.4		8.95	592.2	595.4		8.95	841.3	836.3
9	973.4	982		9	445.2	449		9	1027.4	1026.2		9	780.5	780.2		9	1157.8	1153.8		9	1033.4	1044.5		9	602.9	606.1		9	837.4	832.4
9.05	1001.5	996.9		9.05	453.4	446.3		9.05	1027.7	1030		9.05	813	806.6		9.05	1189.7	1185.2		9.05	1048.5	1043.5		9.05	601.6	598.7		9.05	839	837.6
9.1	1027	1030.1		9.1	464.7	466.1		9.1	1064	1065.7		9.1	820.8	819.5		9.1	1206	1192.3		9.1	1045.1	1050.5		9.1	612.8	609.1		9.1	862.3	863
9.15	1040.3	1037.7		9.15	480.2	477.8		9.15	1074.2	1080.1		9.15	832.8	833.9		9.15	1210.8	1219.9		9.15	1056	1056.5		9.15	624.1	620.1		9.15	877.5	867.6
9.2	1068.1	1062.9		9.2	482.8	471.3		9.2	1092.8	1081.9		9.2	857.1	856.7		9.2	1214.5	1208.8		9.2	1057.3	1061.8		9.2	632.7	640.8		9.2	899.6	897.2
9.25	1079	1080		9.25	488.6	485.2		9.25	1098.3	1096.9		9.25	871.7	868.5		9.25	1245.7	1240.2		9.25	1051.9	1064		9.25	645.6	650		9.25	912.8	909.7
9.3	1101.8	1097.6		9.3	493	499		9.3	1103.2	1105.2		9.3	871.5	876.9		9.3	1258.8	1259.5		9.3	1064	1059.6		9.3	646.6	649		9.3	915.4	906.2
9.35	1117.8	1108.8		9.35	496.8	496.1		9.35	1120	1123.4		9.35	868	870		9.35	1282.5	1282.5		9.35	1084	1073.8		9.35	650.5	648.6		9.35	925.8	925.5
9.4	1140.7	1126.2		9.4	516.2	522.8		9.4	1122.5	1122.4		9.4	885.2	877.9		9.4	1269.7	1266.8		9.4	1070.4	1075.9		9.4	664	666.4		9.4	928.3	924.6
9.45	1142.7	1144.7		9.45	520.3	527.3		9.45	1133.6	1127.8		9.45	911.1	911.9		9.45	1280.8	1276.3		9.45	1112.3	1113.5		9.45	680.3	685		9.45	955	953.9
9.5	1153.5	1150.5		9.5	527	531		9.5	1161.9	1161.4		9.5	903.6	906.4		9.5	1290.4	1291.2		9.5	1131.7	1125.3		9.5	710.3	707.1		9.5	966.1	972.5
9.55	1171.1	1178.1		9.55	537	534.1		9.55	1161.8	1160.4		9.55	920.6	921.6		9.55	1299.2	1291.7		9.55	1142.4	1151.8		9.55	715.3	722.9		9.55	975.6	966.1
9.6	1173.8	1174		9.6	544.2	537.7		9.6	1156.1	1161		9.6	928.6	933.9		9.6	1303.9	1300.6		9.6	1161.8	1163.5		9.6	729.8	726		9.6	993.6	997.5
9.65	1159.6	1158.6		9.65	554.1	553.3		9.65	1176.6	1173.7		9.65	941.9	940.8		9.65	1331.4	1337.7		9.65	1176.9	1174.8		9.65	721.4	726.5		9.65	1011.2	1013.1
9.7	1164.7	1154.3		9.7	547.9	545		9.7	1168.7	1186.3		9.7	952.3	956.7		9.7	1341.1	1345.4		9.7	1218.6	1215.1		9.7	733.8	735.8		9.7	1016.9	1018.6
9.75	1203.7	1194.9		9.75	552.7	558.2		9.75	1196.2	1183.1		9.75	957.8	964.8		9.75	1365.3	1366.4		9.75	1257.1	1252		9.75	741.6	746.6		9.75	1050.2	1045.7
9.8	1224.2	1226.7		9.8	578.3	579.5		9.8	1179.7	1184.6		9.8	975.7	976.8		9.8	1384	1387.4		9.8	1303.4	1300.4		9.8	753.3	758.2		9.8	1075.2	1068.9
9.85	1251.7	1266		9.85	578.5	581.1		9.85	1206.9	1212.6		9.85	1002.1	1007.1		9.85	1400.5	1392.7		9.85	1327.3	1324.6		9.85	745.2	749		9.85	1085.3	1074.4
9.9	1280.2	1275.5		9.9	581.9	582.8		9.9	1217.3	1216.5		9.9	1043.7	1030.5		9.9	1399.5	1409.4		9.9	1335.6	1318.2		9.9	748.1	750		9.9	1098.7	1102.5
9.95	1294.7	1296.6		9.95	594.7	599.6		9.95	1241.5	1239		9.95	1066.1	1050.5		9.95	1416	1422.7		9.95	1354.4	1359.9		9.95	761.8	761.2		9.95	1118.8	1120.7
10	1311	1318.5		10	599.8	599.3		10	1260.2	1269.5		10	1073.1	1080.4		10	1410.8	1412.7		10	1385.8	1390.4		10	768	773.4		10	1109.4	1116
