# Supplementary material for: The solubility product extends the buffering concept to heterotypic biomolecular condensates
Source: eLife. 2021 Jul 8;10:e67176. doi: 10.7554/eLife.67176 (PMC8289413; doi:10.7554/eLife.67176)
Supplement: Figure 3—source data 1. [file elife-67176-fig3-data1.xlsx]

## Sheet: 3A
	SP = 10 * 17.2				SP = 11 * 15.63				SP = 12.5 * 13.75				SP = 12.5 * 13.75
Time (s)	Total A4 (uM)	Total B4 (uM)		Time (s)	Total A4 (uM)	Total B4 (uM)		Time (s)	Total A4 (uM)	Total B4 (uM)		Time (s)	Total A4 (uM)	Total B4 (uM)
0	0.1	0.1		0	0.1	0.1		0	0.1	0.1		0	0.1	0.1
0.02	20.501	28.3		0.02	21.273	26.443		0.02	23.038	24.227		0.02	22.382	24.824
0.04	26.641	35.443		0.04	27.816	33.494		0.04	29.276	31.171		0.04	29.039	31.755
0.06	31.131	40.177		0.06	32.154	37.956		0.06	33.942	35.697		0.06	33.489	36.294
0.08	34.253	43.858		0.08	35.569	41.487		0.08	37.318	39.316		0.08	37.103	40.108
0.1	37.159	46.932		0.1	38.42	44.998		0.1	40.838	42.683		0.1	39.896	42.908
0.12	39.474	49.316		0.12	41.129	47.595		0.12	43.202	44.653		0.12	42.295	45.552
0.14	41.21	51.653		0.14	42.445	49.202		0.14	44.841	46.824		0.14	44.38	47.59
0.16	43.44	53.753		0.16	44.886	51.379		0.16	46.886	48.526		0.16	45.71	49.398
0.18	45.182	55.676		0.18	46.365	53.083		0.18	48.576	50.203		0.18	47.344	50.866
0.2	47.126	57.868		0.2	48.2	54.809		0.2	50.128	51.857		0.2	48.722	52.646
0.22	48.608	59.823		0.22	49.661	56.523		0.22	51.071	53.264		0.22	50.147	53.763
0.24	49.654	60.692		0.24	51.138	58.17		0.24	52.494	54.128		0.24	51.084	54.534
0.26	51.192	62.234		0.26	51.933	59.323		0.26	53.534	55.463		0.26	52.221	55.993
0.28	52.576	63.66		0.28	53.148	60.594		0.28	54.525	56.352		0.28	53.187	56.414
0.3	53.681	65.025		0.3	54.29	61.475		0.3	54.806	56.818		0.3	53.909	57.614
0.32	54.409	66.206		0.32	54.924	62.331		0.32	55.492	57.3		0.32	54.836	58.829
0.34	55.484	67.241		0.34	55.277	63.138		0.34	56.744	58.507		0.34	55.169	59.039
0.36	56.489	68.361		0.36	56.097	63.557		0.36	57.523	59.519		0.36	56.191	60.064
0.38	57.21	68.745		0.38	57.423	64.636		0.38	58.428	60.066		0.38	56.938	60.458
0.4	58.195	70.326		0.4	58.058	65.662		0.4	59.349	61.622		0.4	57.389	60.923
0.42	59.385	71.315		0.42	58.995	66.797		0.42	59.682	61.79		0.42	58.02	61.952
0.44	60.116	71.959		0.44	59.744	67.264		0.44	59.945	61.811		0.44	58.878	62.763
0.46	60.864	72.784		0.46	60.339	67.745		0.46	60.597	62.461		0.46	59.635	63.06
0.48	61.724	74.27		0.48	61.334	68.874		0.48	61.116	62.84		0.48	60.25	63.868
0.5	62.634	74.786		0.5	62.036	70.132		0.5	61.535	63.458		0.5	60.748	64.719
0.52	63.387	75.444		0.52	62.215	70.072		0.52	62.228	64.401		0.52	61.589	65.379
0.54	64.125	76.608		0.54	62.444	70.411		0.54	63.109	65.242		0.54	61.987	65.857
0.56	65.082	77.973		0.56	63.158	70.851		0.56	63.222	65.283		0.56	62.542	66.127
0.58	66.072	78.932		0.58	63.821	71.878		0.58	63.909	66.34		0.58	62.811	66.766
0.6	66.93	79.673		0.6	64.118	72.366		0.6	64.68	66.781		0.6	63.535	67.198
0.62	68.338	81.252		0.62	64.659	72.621		0.62	65.239	67.511		0.62	63.915	67.859
0.64	69.05	82.241		0.64	65.7	73.569		0.64	65.677	67.994		0.64	64.385	68.568
0.66	69.993	83.016		0.66	66.735	74.758		0.66	66.617	68.343		0.66	65.294	69.424
0.68	70.938	83.9		0.68	67.16	75.535		0.68	66.513	68.751		0.68	65.504	69.668
0.7	71.591	85.296		0.7	68.163	76.43		0.7	67.32	69.458		0.7	66.094	70.159
0.72	73.038	86.256		0.72	68.813	77.076		0.72	67.718	70.087		0.72	66.668	70.8
0.74	73.915	87.29		0.74	69.5	77.709		0.74	68.724	71.103		0.74	67.758	71.605
0.76	75.332	88.473		0.76	70.125	78.597		0.76	69.11	71.542		0.76	68.024	71.968
0.78	76.254	89.914		0.78	70.698	78.678		0.78	69.786	71.86		0.78	68.608	72.897
0.8	77.267	90.417		0.8	71.506	79.767		0.8	70.301	72.57		0.8	69.712	73.972
0.82	78.214	92.199		0.82	71.96	80.492		0.82	70.849	72.797		0.82	70.457	74.718
0.84	78.952	92.828		0.84	72.454	80.958		0.84	70.958	73.186		0.84	71.593	75.855
0.86	79.601	93.555		0.86	72.726	81.361		0.86	71.706	73.938		0.86	72.339	76.742
0.88	80.732	94.389		0.88	73.479	81.955		0.88	72.154	74.865		0.88	72.811	77.072
0.9	81.701	95.698		0.9	73.59	81.978		0.9	73.11	75.765		0.9	73.316	77.465
0.92	82.998	97.487		0.92	74.258	83.178		0.92	73.75	76.296		0.92	73.596	77.722
0.94	83.898	97.962		0.94	74.579	83.474		0.94	74.106	76.165		0.94	74.035	78.371
0.96	84.529	98.752		0.96	75.725	84.423		0.96	74.74	77.229		0.96	74.48	78.505
0.98	86.141	100.602		0.98	76.6	85.551		0.98	74.996	77.365		0.98	74.738	79.146
1	86.692	101.765		1	76.723	85.623		1	75.608	77.612		1	75.052	79.387
1.02	87.933	102.393		1.02	77.639	86.164		1.02	75.767	78.009		1.02	75.69	80.104
1.04	89.165	103.769		1.04	78.295	86.96		1.04	76.324	78.777		1.04	76.806	81.275
1.06	89.599	104.747		1.06	79.336	88.003		1.06	76.66	78.737		1.06	77.479	82.099
1.08	90.372	105.843		1.08	80.041	88.828		1.08	77.09	79.578		1.08	77.986	82.343
1.1	91.889	107.085		1.1	80.631	89.338		1.1	77.697	80.468		1.1	78.859	83.29
1.12	93.441	108.586		1.12	81.365	90.273		1.12	78.519	80.409		1.12	79.102	83.264
1.14	94.65	109.625		1.14	82.36	91.442		1.14	79.199	81.448		1.14	79.527	83.837
1.16	96.027	111.717		1.16	82.701	91.524		1.16	80.51	82.495		1.16	79.926	83.964
1.18	97.531	113.355		1.18	83.107	92.403		1.18	80.619	83.225		1.18	80.603	84.74
1.2	99.423	115.23		1.2	84.191	93.122		1.2	81.485	83.722		1.2	81.117	85.738
1.22	100.703	116.499		1.22	85.171	94.412		1.22	81.48	84.145		1.22	82.204	86.577
1.24	101.337	117.355		1.24	85.992	94.859		1.24	82.118	84.085		1.24	82.906	87.185
1.26	102.247	118.106		1.26	86.065	95.245		1.26	82.138	84.769		1.26	83.675	88.02
1.28	103.386	119.691		1.28	87.206	96.711		1.28	82.581	85.281		1.28	83.972	88.287
1.3	104.58	121.109		1.3	88.323	97.441		1.3	83.656	86.18		1.3	84.275	89.085
1.32	106.07	122.481		1.32	89.099	98.428		1.32	83.995	86.733		1.32	85.164	89.819
1.34	107.104	124.188		1.34	90.28	99.821		1.34	84.368	86.591		1.34	85.498	90.253
1.36	107.86	124.14		1.36	91.941	101.612		1.36	85.136	87.627		1.36	86.758	91.311
1.38	109.003	125.769		1.38	93.488	102.923		1.38	85.52	87.867		1.38	87.137	92.116
1.4	110.472	127.283		1.4	93.715	103.736		1.4	86.324	88.575		1.4	87.828	92.507
1.42	111.707	129.228		1.42	94.597	104.561		1.42	87.36	89.652		1.42	88.288	92.612
1.44	112.855	130.06		1.44	96.23	105.894		1.44	87.508	89.919		1.44	89.176	93.487
1.46	114.636	131.661		1.46	96.355	106.761		1.46	87.752	90.633		1.46	89.203	93.66
1.48	115.867	133.352		1.48	97.141	106.862		1.48	89.344	91.382		1.48	89.449	94.556
1.5	117.351	134.788		1.5	98.471	108.31		1.5	89.577	92.169		1.5	90.306	94.86
1.52	118.682	136.374		1.52	99.613	109.401		1.52	89.74	92.147		1.52	90.981	95.288
1.54	119.989	137.847		1.54	100.486	110.245		1.54	90.454	92.937		1.54	90.897	95.732
1.56	121.545	139.385		1.56	101.228	111.572		1.56	92.079	94.074		1.56	92.013	96.521
1.58	122.991	141.357		1.58	101.54	112.147		1.58	92.327	94.898		1.58	92.571	96.963
1.6	124.909	143.646		1.6	102.732	113.186		1.6	93.27	95.849		1.6	93.721	98.294
1.62	127.193	145.502		1.62	104.195	114.466		1.62	93.842	96.815		1.62	94.221	99.159
1.64	128.474	147.122		1.64	105.244	115.559		1.64	94.468	97.206		1.64	95.071	100.044
1.66	129.844	148.477		1.66	105.755	116.28		1.66	95.292	97.679		1.66	95.98	100.873
1.68	131.524	150.543		1.68	107.307	117.637		1.68	95.839	98.22		1.68	96.844	101.655
1.7	133.256	152.193		1.7	107.983	118.266		1.7	97.102	99.937		1.7	97.664	102.793
1.72	134.865	153.946		1.72	108.659	119.444		1.72	98.007	100.991		1.72	98.307	103.097
1.74	136.098	155.506		1.74	110.031	120.302		1.74	98.288	101.265		1.74	99.013	103.84
1.76	137.412	156.865		1.76	110.817	121.3		1.76	98.689	101.57		1.76	99.832	104.854
1.78	139.046	158.803		1.78	111.692	122.687		1.78	99.101	102.063		1.78	99.888	104.767
1.8	141.131	160.633		1.8	112.936	123.916		1.8	100.615	103.419		1.8	100.453	105.693
1.82	142.749	162.786		1.82	113.901	124.664		1.82	101.126	103.955		1.82	101.402	106.357
1.84	143.886	163.673		1.84	114.392	125.741		1.84	101.896	104.707		1.84	102.263	106.994
1.86	145.645	165.784		1.86	115.937	127.153		1.86	102.562	105.269		1.86	103.41	108.399
1.88	147.58	167.847		1.88	116.77	127.836		1.88	103.214	106.137		1.88	104.339	109.543
1.9	149.192	169.761		1.9	117.277	128.542		1.9	104.139	106.986		1.9	104.907	109.876
1.92	150.713	171.398		1.92	118.832	129.887		1.92	105.795	108.497		1.92	105.441	110.638
1.94	152.576	173.209		1.94	119.808	131.068		1.94	105.867	108.529		1.94	106.899	112.1
1.96	154.184	175.212		1.96	121.202	133.033		1.96	106.869	109.745		1.96	107.532	112.496
1.98	156.082	177.333		1.98	121.947	133.416		1.98	107.818	110.968		1.98	107.961	113.634
2	157.823	179.004		2	123.169	134.788		2	108.513	111.565		2	108.75	113.903
2.02	159.945	181.752		2.02	124.065	135.383		2.02	109.477	112.587		2.02	109.439	115.152
2.04	161.751	183.75		2.04	124.934	136.583		2.04	110.187	112.77		2.04	110.71	115.926
2.06	163.921	186.198		2.06	126.316	137.558		2.06	111.161	114.031		2.06	111.408	116.733
2.08	166.3	188.501		2.08	127.727	139.417		2.08	112.015	115.224		2.08	112.341	117.352
2.1	168.616	191.073		2.1	128.702	140.736		2.1	112.946	115.838		2.1	113.172	118.267
2.12	170.835	193.574		2.12	130.048	142.224		2.12	113.534	116.605		2.12	113.463	118.865
2.14	172.689	195.294		2.14	130.765	142.624		2.14	114.202	117.139		2.14	114.248	119.757
2.16	174.962	197.948		2.16	132.144	144.178		2.16	115.681	118.371		2.16	114.944	120.216
2.18	176.046	198.903		2.18	133.002	145.28		2.18	116.289	119.216		2.18	115.756	121.029
2.2	177.743	201.281		2.2	134.541	146.674		2.2	116.771	119.563		2.2	116.721	121.961
2.22	179.458	203.026		2.22	135.188	147.637		2.22	117.162	119.77		2.22	117.203	122.89
2.24	181.237	205.946		2.24	136.775	148.923		2.24	117.684	120.74		2.24	118.178	124.035
2.26	183.787	207.526		2.26	137.45	149.886		2.26	119.177	122.242		2.26	118.852	124.219
2.28	185.987	210.211		2.28	139.049	151.787		2.28	119.885	123.137		2.28	120.216	125.737
2.3	188.193	212.203		2.3	140.152	152.437		2.3	121.099	123.997		2.3	121.507	126.743
2.32	190.534	214.774		2.32	142.241	154.31		2.32	121.958	125.089		2.32	122.415	127.779
2.34	192.836	217.123		2.34	143.399	156.32		2.34	122.852	125.853		2.34	123.067	128.786
2.36	194.734	219.692		2.36	144.543	157.043		2.36	123.594	126.619		2.36	123.232	129.537
2.38	197.145	222.08		2.38	145.491	158.507		2.38	124.425	127.808		2.38	124.384	130.09
2.4	199.563	224.575		2.4	147.356	160.359		2.4	125.53	128.357		2.4	124.745	130.691
2.42	201.396	227.028		2.42	148.44	161.477		2.42	126.97	129.825		2.42	125.627	131.899
2.44	204.054	229.538		2.44	148.913	162.029		2.44	128.249	131.676		2.44	126.865	132.75
2.46	206.423	232.438		2.46	150.391	163.093		2.46	128.978	132.249		2.46	128.133	133.768
2.48	208.076	234.409		2.48	151.045	164.464		2.48	130.064	133.254		2.48	129.485	135.54
2.5	210.241	236.351		2.5	152.402	165.481		2.5	130.93	133.553		2.5	131.07	136.685
2.52	211.519	238.304		2.52	153.883	167.673		2.52	131.26	134.631		2.52	132.039	137.767
2.54	214.217	241.14		2.54	155.207	168.61		2.54	132.256	135.548		2.54	132.885	138.898
2.56	216.896	244.414		2.56	156.794	170.371		2.56	133.017	136.106		2.56	134.236	140.582
2.58	219.212	246.265		2.58	158.331	172.036		2.58	133.843	137.399		2.58	135.489	141.514
2.6	221.571	248.76		2.6	159.063	172.735		2.6	134.507	138.437		2.6	136.56	143.175
2.62	224.234	252.318		2.62	160.131	174.061		2.62	135.555	139.306		2.62	137.891	143.809
2.64	227.462	254.832		2.64	161.5	175.514		2.64	136.4	139.585		2.64	138.688	144.979
2.66	229.1	257.715		2.66	163.343	176.941		2.66	137.804	141.026		2.66	140.047	146.092
2.68	231.61	260.693		2.68	164.66	178.504		2.68	138.614	141.687		2.68	141.257	147.647
2.7	234.021	262.575		2.7	166.261	180.532		2.7	139.62	142.505		2.7	142.006	148.303
2.72	236.437	265.189		2.72	168.154	182.345		2.72	140.388	143.672		2.72	142.956	149.557
2.74	239.286	268.557		2.74	169.934	184.118		2.74	141.425	144.638		2.74	144.4	150.747
2.76	241.932	271.456		2.76	172.055	186.176		2.76	142.306	145.383		2.76	145.379	151.675
2.78	245.499	275.115		2.78	173.454	188.052		2.78	143.769	147.009		2.78	146.91	153.41
2.8	248.326	278.125		2.8	174.833	189.455		2.8	144.546	147.788		2.8	148.82	155.219
2.82	250.458	280.077		2.82	176.3	190.741		2.82	145.116	148.326		2.82	150.169	156.28
2.84	252.171	282.77		2.84	177.679	192.484		2.84	145.813	149.183		2.84	151.149	158.075
2.86	255.756	286.448		2.86	179.339	193.906		2.86	146.788	150.376		2.86	152.406	158.849
2.88	258.804	289.432		2.88	180.685	195.585		2.88	148.597	152.012		2.88	153.799	160.979
2.9	261.262	292.061		2.9	182.407	197.269		2.9	149.826	153.228		2.9	154.762	161.642
2.92	264.086	295.468		2.92	184.325	199.168		2.92	150.763	154.223		2.92	156.625	163.278
2.94	266.627	298.594		2.94	185.916	201.064		2.94	152.157	155.56		2.94	158.045	164.482
2.96	269.99	301.662		2.96	187.218	202.639		2.96	153.324	156.772		2.96	158.946	166.162
2.98	272.84	304.931		2.98	188.52	204.286		2.98	154.756	158.103		2.98	160.181	167.265
3	276.25	308.54		3	190.189	206.09		3	155.689	159.539		3	161.528	168.386
3.02	279.008	312.792		3.02	191.918	207.911		3.02	157.028	160.948		3.02	162.47	169.772
3.04	281.889	315.187		3.04	194.107	210.286		3.04	158.174	161.83		3.04	164.158	171.02
3.06	285.332	318.587		3.06	195.315	211.374		3.06	159.643	163.293		3.06	164.882	172.283
3.08	288.296	321.525		3.08	197.015	213.4		3.08	160.735	164.725		3.08	166.45	173.275
3.1	291.129	325.171		3.1	198.961	215.441		3.1	162.548	166.356		3.1	167.219	174.471
3.12	293.243	327.098		3.12	200.76	217.326		3.12	163.156	167.126		3.12	168.2	175.607
3.14	296.381	330.766		3.14	203.089	219.448		3.14	164.447	168.124		3.14	170.581	177.621
3.16	299.188	333.895		3.16	204.186	221.18		3.16	165.582	169.489		3.16	171.918	179.034
3.18	301.705	336.846		3.18	206.521	223.074		3.18	167.092	170.62		3.18	172.708	180.457
3.2	305.371	340.741		3.2	208.158	224.847		3.2	168.096	172.118		3.2	174.222	181.228
3.22	308.344	343.548		3.22	209.914	226.938		3.22	169.56	173.583		3.22	175.537	183.01
3.24	311.808	347.834		3.24	211.466	228.265		3.24	171.305	175.304		3.24	176.843	184.261
3.26	315.35	351.943		3.26	212.962	229.933		3.26	172.522	175.944		3.26	178.222	186.025
3.28	318.858	355.615		3.28	214.086	231.563		3.28	173.716	177.925		3.28	179.914	187.167
3.3	322.675	360.093		3.3	217.148	234.696		3.3	175.171	179.089		3.3	181.236	188.662
3.32	326.022	363.361		3.32	219.002	236.57		3.32	176.655	180.521		3.32	183.005	191.017
3.34	329.776	367.782		3.34	221.423	238.918		3.34	178.183	181.952		3.34	184.785	192.636
3.36	332.586	370.247		3.36	223.598	241.029		3.36	178.929	183.346		3.36	186.454	194.276
3.38	335.182	373.813		3.38	225.21	243.106		3.38	180.737	184.675		3.38	188.207	195.693
3.4	338.75	377.543		3.4	227.221	245.45		3.4	182.027	186.138		3.4	189.801	197.325
3.42	341.956	380.763		3.42	229.538	247.589		3.42	183.688	187.584		3.42	191.142	199.035
3.44	345.434	385.073		3.44	232.193	249.906		3.44	184.792	189.102		3.44	192.764	200.561
3.46	349.034	388.704		3.46	233.661	251.941		3.46	186.913	190.733		3.46	194.186	202.07
3.48	351.496	391.752		3.48	235.184	253.236		3.48	187.929	192.498		3.48	196.034	203.732
3.5	355.888	395.985		3.5	237.617	256.353		3.5	189.004	193.499		3.5	197.754	205.994
3.52	359.588	400.076		3.52	239.22	258.067		3.52	190.781	194.864		3.52	199.489	207.312
3.54	362.87	404.182		3.54	241.785	260.432		3.54	192.262	196.407		3.54	201.038	209.16
3.56	367.344	407.961		3.56	244.051	262.631		3.56	194.19	198.316		3.56	201.861	210.095
3.58	370.99	412.059		3.58	245.794	264.644		3.58	195.303	199.917		3.58	203.723	211.52
3.6	374.938	416.726		3.6	247.613	266.615		3.6	197.432	201.778		3.6	204.872	212.881
3.62	378.589	420.475		3.62	249.812	268.477		3.62	199.163	203.458		3.62	206.854	214.792
3.64	382.175	424.463		3.64	251.893	271.109		3.64	200.191	204.269		3.64	208.392	216.659
3.66	385.996	428.978		3.66	254.551	273.964		3.66	201.81	205.89		3.66	210.406	218.132
3.68	390.526	433.672		3.68	257.145	276.754		3.68	203.538	208.099		3.68	211.733	220.382
3.7	394.294	438.232		3.7	259.589	279.19		3.7	204.932	209.642		3.7	213.95	222.211
3.72	397.752	442.295		3.72	260.972	281.261		3.72	206.95	211.269		3.72	215.572	224.257
3.74	401.65	447.046		3.74	263.368	283.774		3.74	208.121	212.401		3.74	216.991	225.179
3.76	406.189	451.808		3.76	266.028	286.168		3.76	209.643	213.649		3.76	218.824	227.291
3.78	410.24	455.956		3.78	267.927	287.989		3.78	210.949	215.572		3.78	220.377	228.871
3.8	413.978	459.515		3.8	269.451	290.707		3.8	212.187	216.65		3.8	221.038	230.543
3.82	419.053	464.67		3.82	272.74	293.547		3.82	214.024	218.133		3.82	223.098	231.913
3.84	422.84	468.976		3.84	274.866	295.957		3.84	215.466	220.191		3.84	224.154	232.942
3.86	427.445	474.569		3.86	276.914	298.026		3.86	216.784	221.303		3.86	225.847	234.553
3.88	431.007	478.156		3.88	279.18	300.082		3.88	217.946	222.832		3.88	227.216	236.303
3.9	434.709	482.536		3.9	281.197	302.574		3.9	218.92	224.226		3.9	229.297	238.133
3.92	438.828	486.349		3.92	283.383	304.943		3.92	220.278	225.483		3.92	230.778	239.779
3.94	443.182	491.148		3.94	285.552	306.469		3.94	221.342	226.756		3.94	233.251	241.984
3.96	446.93	495.568		3.96	287.731	308.695		3.96	222.938	227.79		3.96	234.356	243.624
3.98	451.833	500.811		3.98	290.071	311.353		3.98	225.227	229.409		3.98	236.412	245.669
4	456.196	506.054		4	291.63	313.581		4	227.032	232.221		4	238.497	247.662

## Sheet: 3B
	SP = 8 * 20				SP = 9 * 17.78				SP = 10 * 16				SP = 11 * 14.55
Time (s)	Total A4 (uM)	Total B4 (uM)		Time (s)	Total A4 (uM)	Total B4 (uM)		Time (s)	Total A4 (uM)	Total B4 (uM)		Time (s)	Total A4 (uM)	Total B4 (uM)
0	0.1	0.1		0	0.1	0.1		0	0.1	0.1		0	0.1	0.1
0.025	19.03	32.702		0.025	20.118	29.988		0.025	21.234	27.968		0.025	22.087	26.106
0.05	24.811	39.664		0.05	25.792	37.072		0.05	27.066	34.153		0.05	28.202	32.583
0.075	29.12	44.491		0.075	29.613	40.829		0.075	30.864	38.459		0.075	32.134	36.378
0.1	31.824	47.64		0.1	32.154	43.701		0.1	33.718	41.841		0.1	35.014	39.619
0.125	34.061	50.352		0.125	34.627	46.664		0.125	35.346	43.565		0.125	36.966	41.624
0.15	35.992	52.51		0.15	36.416	48.364		0.15	36.359	44.506		0.15	37.989	42.95
0.175	37.455	53.933		0.175	37.633	49.529		0.175	37.608	46.162		0.175	39.116	44.047
0.2	38.321	55.38		0.2	38.322	50.293		0.2	38.866	47.159		0.2	40.243	45.051
0.225	38.915	56.049		0.225	38.701	51.29		0.225	39.624	47.973		0.225	41.096	46.118
0.25	40.146	57.348		0.25	39.643	51.968		0.25	40.325	48.781		0.25	41.147	46.657
0.275	40.625	58.237		0.275	40.309	52.935		0.275	40.933	49.378		0.275	41.391	46.593
0.3	41.639	59.335		0.3	40.441	52.814		0.3	41.409	49.885		0.3	42.208	47.401
0.325	42.148	59.869		0.325	40.672	53.366		0.325	42.247	50.866		0.325	42.713	47.842
0.35	42.437	60.196		0.35	40.977	54.12		0.35	42.302	51.424		0.35	42.984	48.245
0.375	42.586	60.649		0.375	41.519	54.391		0.375	42.629	51.098		0.375	43.504	48.537
0.4	43.353	61.354		0.4	42.088	54.715		0.4	42.564	51.67		0.4	43.528	48.532
0.425	43.472	61.145		0.425	42.291	55.313		0.425	43.055	51.921		0.425	43.768	48.925
0.45	43.235	61.525		0.45	42.657	55.725		0.45	43.654	52.082		0.45	44.206	48.997
0.475	43.708	61.634		0.475	42.993	55.773		0.475	43.133	52.323		0.475	44.589	49.969
0.5	43.618	61.28		0.5	42.994	56.205		0.5	43.437	52.083		0.5	44.701	49.562
0.525	43.84	61.672		0.525	42.84	56.01		0.525	43.379	52.221		0.525	44.575	50.11
0.55	44.319	62.27		0.55	42.823	55.651		0.55	43.679	52.421		0.55	44.222	49.629
0.575	44.923	62.697		0.575	42.917	55.612		0.575	43.262	51.96		0.575	44.797	49.69
0.6	44.837	63.468		0.6	42.656	55.514		0.6	43.374	52.155		0.6	44.724	49.798
0.625	45.057	63.148		0.625	42.601	55.233		0.625	43.397	52.493		0.625	44.316	49.593
0.65	45.682	63.754		0.65	43.065	56.247		0.65	43.64	52.649		0.65	44.52	49.529
0.675	45.541	63.842		0.675	43.403	56.25		0.675	43.439	52.374		0.675	44.268	49.309
0.7	45.969	64.096		0.7	43.429	56.767		0.7	43.25	52.281		0.7	43.675	48.93
0.725	45.821	64.247		0.725	43.493	56.464		0.725	43.004	52.326		0.725	43.771	48.909
0.75	45.738	64.141		0.75	43.109	56.294		0.75	43.477	52.259		0.75	43.683	48.899
0.775	45.821	64.228		0.775	43.513	56.206		0.775	43.608	52.376		0.775	43.609	48.914
0.8	45.554	63.687		0.8	43.652	56.54		0.8	43.566	51.889		0.8	43.812	48.78
0.825	45.174	63.526		0.825	43.964	57.108		0.825	43.539	52.323		0.825	43.832	49.117
0.85	45.109	63.339		0.85	43.728	56.442		0.85	43.388	52.414		0.85	43.798	49.062
0.875	45.502	63.662		0.875	43.179	56.396		0.875	43.247	51.624		0.875	43.585	48.64
0.9	45.291	63.806		0.9	43.716	56.782		0.9	43.071	52.071		0.9	43.496	48.515
0.925	45.679	63.824		0.925	43.669	56.367		0.925	42.84	51.448		0.925	43.23	48.497
0.95	45.7	64.195		0.95	43.633	56.772		0.95	43.002	51.959		0.95	43.157	48.317
0.975	45.982	63.837		0.975	43.542	56.24		0.975	42.926	51.579		0.975	43.628	48.407
1	46.202	64.493		1	43.915	56.881		1	43.311	51.958		1	43.386	48.694
1.025	46.202	64.605		1.025	44.142	57.022		1.025	43.157	52.119		1.025	43.622	48.7
1.05	46.495	64.637		1.05	44.283	57.079		1.05	42.798	51.277		1.05	44.012	49.072
1.075	46.466	65.187		1.075	44.221	57.314		1.075	43.195	52.019		1.075	43.894	49.003
1.1	46.389	64.506		1.1	44.466	57.452		1.1	43.07	52.012		1.1	43.934	49.025
1.125	45.44	64.193		1.125	44.192	57.358		1.125	42.995	51.601		1.125	44.478	49.483
1.15	45.431	63.801		1.15	44.106	57.125		1.15	43.047	51.779		1.15	44.335	49.387
1.175	45.356	63.589		1.175	43.767	56.927		1.175	43.073	51.72		1.175	44.819	49.873
1.2	45.144	63.282		1.2	44.183	57.167		1.2	43.207	51.834		1.2	44.576	49.849
1.225	45.602	63.886		1.225	43.831	56.773		1.225	43.12	51.619		1.225	44.373	49.336
1.25	45.769	64.118		1.25	43.532	56.516		1.25	42.746	51.517		1.25	44.172	49.277
1.275	45.828	64.439		1.275	43.544	56.598		1.275	43.187	51.816		1.275	43.758	49.122
1.3	45.27	63.833		1.3	43.054	56.355		1.3	43.509	52.248		1.3	43.957	49.228
1.325	45.543	63.676		1.325	42.943	55.984		1.325	43.279	52.141		1.325	44.227	49.651
1.35	46.039	64.262		1.35	43.096	56.159		1.35	43.811	52.082		1.35	44.33	49.28
1.375	46.094	64.137		1.375	42.852	56.031		1.375	43.246	52.095		1.375	44.144	48.904
1.4	45.465	63.736		1.4	43.128	55.822		1.4	43.397	52.243		1.4	44.079	49.025
1.425	45.25	63.719		1.425	43.148	56.305		1.425	43.443	52.411		1.425	43.595	48.861
1.45	45.629	64.027		1.45	43.343	56.29		1.45	43.258	52.302		1.45	43.806	48.774
1.475	45.767	64.174		1.475	43.468	56.763		1.475	43.51	52.247		1.475	43.949	48.957
1.5	45.804	64.345		1.5	43.216	56.295		1.5	43.419	52.036		1.5	43.805	48.735
1.525	45.973	64.409		1.525	43.285	56.132		1.525	43.188	51.958		1.525	44.328	49.292
1.55	45.761	64.542		1.55	43.514	56.717		1.55	43.415	51.795		1.55	44.606	49.727
1.575	45.989	64.216		1.575	43.463	56.672		1.575	43.527	52.177		1.575	44.397	49.748
1.6	45.677	63.792		1.6	43.701	56.731		1.6	43.734	52.243		1.6	44.332	49.474
1.625	45.915	64.094		1.625	43.78	57.038		1.625	43.276	52.487		1.625	44.216	49.309
1.65	45.745	64.487		1.65	43.842	56.823		1.65	43.728	52.516		1.65	44.106	49.266
1.675	45.919	64.416		1.675	43.924	57.081		1.675	43.74	52.697		1.675	43.847	48.834
1.7	46.062	64.223		1.7	44.749	57.549		1.7	43.83	52.578		1.7	43.947	48.895
1.725	45.491	63.665		1.725	44.489	57.541		1.725	43.526	52.142		1.725	43.832	49.259
1.75	45.776	64.282		1.75	44.689	57.311		1.75	43.587	52.39		1.75	43.955	48.927
1.775	46.1	64.767		1.775	44.119	57.159		1.775	43.918	52.913		1.775	43.722	48.981
1.8	46.231	64.945		1.8	44.513	57.456		1.8	43.919	52.416		1.8	43.664	48.823
1.825	46.092	64.621		1.825	44.312	57.44		1.825	43.981	52.692		1.825	44.032	49.217
1.85	46.189	64.369		1.85	44.665	58.049		1.85	44.021	52.87		1.85	43.967	49.064
1.875	45.954	64.265		1.875	44.925	58.001		1.875	44.43	52.996		1.875	43.998	49.043
1.9	46.36	64.68		1.9	45.032	58.111		1.9	44.542	53.155		1.9	43.913	49.323
1.925	46.18	64.739		1.925	44.868	58.113		1.925	44.47	53.482		1.925	43.963	49.204
1.95	46.302	64.792		1.95	44.892	58.039		1.95	44.904	53.644		1.95	43.973	48.964
1.975	46.601	65.256		1.975	44.979	58.168		1.975	44.544	53.233		1.975	43.53	48.936
2	46.094	64.578		2	45.24	58.457		2	44.602	53.613		2	43.962	48.862
2.025	46.159	64.677		2.025	45.411	58.566		2.025	44.222	53.037		2.025	44.139	49.029
2.05	46.192	64.393		2.05	44.985	58.306		2.05	44.277	53.108		2.05	44.029	49.079
2.075	46.498	64.735		2.075	44.797	57.993		2.075	44.369	53.241		2.075	44.385	49.509
2.1	46.214	64.475		2.1	44.726	57.879		2.1	44.397	53.144		2.1	43.95	49.405
2.125	45.894	64.285		2.125	44.352	57.848		2.125	44.095	52.594		2.125	44.332	49.51
2.15	45.719	64.456		2.15	44.136	57.253		2.15	43.78	52.876		2.15	44.52	49.345
2.175	45.714	64.08		2.175	44.446	57.293		2.175	43.583	52.421		2.175	44.226	49.292
2.2	46.011	64.335		2.2	44.13	57.326		2.2	43.818	52.365		2.2	44.012	49.127
2.225	45.961	64.29		2.225	43.721	56.761		2.225	43.558	52.16		2.225	44.311	49.257
2.25	46.083	64.269		2.25	43.272	56.35		2.25	43.245	51.927		2.25	44.235	49.523
2.275	45.66	64.358		2.275	42.983	55.765		2.275	43.384	52.246		2.275	44.016	49.296
2.3	46.148	64.788		2.3	43.232	56.029		2.3	43.4	52.235		2.3	44.473	49.292
2.325	46.771	64.888		2.325	43.555	56.657		2.325	43.406	51.915		2.325	44.409	49.643
2.35	46.881	65.285		2.35	43.683	56.767		2.35	43.793	52.379		2.35	43.913	49.18
2.375	46.716	65.285		2.375	44.099	57.034		2.375	43.379	52.112		2.375	44.167	49.323
2.4	47.126	65.366		2.4	44.184	57.321		2.4	43.325	51.976		2.4	44.331	49.109
2.425	47.256	66.026		2.425	43.787	57.037		2.425	42.838	51.331		2.425	44.224	49.154
2.45	47.366	66.022		2.45	44.141	56.889		2.45	42.82	51.329		2.45	44.155	49.49
2.475	47	65.747		2.475	43.853	56.731		2.475	42.913	51.39		2.475	43.913	49.325
2.5	46.871	65.434		2.5	44.073	56.803		2.5	42.962	51.575		2.5	44.328	49.77
2.525	47.134	65.606		2.525	43.919	57		2.525	43.007	51.635		2.525	44.484	49.622
2.55	46.9	65.531		2.55	43.858	56.978		2.55	43.219	51.625		2.55	44.436	49.523
2.575	46.9	65.147		2.575	43.964	56.758		2.575	42.484	51.493		2.575	44.334	49.449
2.6	46.932	65.075		2.6	43.754	56.902		2.6	42.942	51.625		2.6	44.203	49.487
2.625	46.319	64.906		2.625	43.465	56.403		2.625	43.102	51.709		2.625	44.448	49.125
2.65	46.279	64.445		2.65	43.402	56.242		2.65	43.033	51.786		2.65	43.809	49.219
2.675	46.147	64.586		2.675	43.59	56.358		2.675	42.595	51.435		2.675	43.918	48.708
2.7	46.041	64.459		2.7	43.671	56.812		2.7	42.8	51.35		2.7	43.845	49.164
2.725	46.043	64.596		2.725	43.252	56.425		2.725	42.623	51.624		2.725	43.948	49.043
2.75	46.088	64.382		2.75	43.545	56.307		2.75	43.066	51.954		2.75	44.223	49.026
2.775	45.931	63.907		2.775	43.562	56.355		2.775	43.048	51.611		2.775	43.941	48.926
2.8	45.937	64.105		2.8	43.973	57.09		2.8	43.343	52.338		2.8	44.325	49.289
2.825	46.027	64.214		2.825	43.734	56.629		2.825	43.704	52.459		2.825	44.057	49.033
2.85	45.841	64.078		2.85	43.784	56.589		2.85	43.556	52.476		2.85	43.675	48.945
2.875	46.03	64.171		2.875	43.841	56.676		2.875	43.441	52.35		2.875	44.05	49.259
2.9	45.757	64.06		2.9	43.853	56.725		2.9	43.172	51.841		2.9	44.242	49.286
2.925	46.029	64.001		2.925	43.768	56.579		2.925	43.187	52.449		2.925	43.761	48.674
2.95	46.155	64.38		2.95	44.195	57.317		2.95	43.377	51.778		2.95	43.847	48.974
2.975	46.238	65.08		2.975	44.44	57.336		2.975	43.205	51.975		2.975	44.19	49.29
3	46.332	64.553		3	44.253	56.994		3	43.394	51.969		3	44.54	49.459
3.025	46.145	64.616		3.025	44.407	57.362		3.025	43.899	52.117		3.025	44.563	49.768
3.05	45.914	63.627		3.05	44.319	57.353		3.05	43.806	52.717		3.05	43.976	49.492
3.075	46.22	64.37		3.075	44.053	56.96		3.075	43.8	52.432		3.075	44.598	49.666
3.1	46.104	64.303		3.1	44.503	57.476		3.1	43.591	52.542		3.1	44.543	49.87
3.125	46.457	64.718		3.125	44.157	57.403		3.125	43.288	52.022		3.125	44.577	49.549
3.15	46.56	64.706		3.15	44.138	56.938		3.15	43.068	51.961		3.15	44.207	49.485
3.175	46.774	65.245		3.175	44.225	57.208		3.175	42.412	51.118		3.175	44.254	49.562
3.2	46.625	64.702		3.2	43.931	57.075		3.2	42.844	51.595		3.2	43.566	48.781
3.225	46.661	64.809		3.225	44.023	57.294		3.225	42.59	51.617		3.225	43.262	48.587
3.25	46.507	64.789		3.25	44.065	57.101		3.25	42.3	51.145		3.25	43.388	48.513
3.275	46.472	64.734		3.275	44.083	56.696		3.275	42.958	51.465		3.275	43.754	48.785
3.3	46.691	64.877		3.3	43.993	57.083		3.3	42.739	51.899		3.3	44.505	49.517
3.325	46.381	65.193		3.325	43.751	57.056		3.325	42.81	51.594		3.325	44.601	49.677
3.35	46.549	64.836		3.35	44.068	57.139		3.35	42.712	51.472		3.35	44.251	49.648
3.375	46.401	64.891		3.375	44.251	57.315		3.375	42.941	51.539		3.375	44.285	49.51
3.4	46.665	64.977		3.4	43.937	56.862		3.4	43.274	51.765		3.4	44.043	49.362
3.425	46.634	64.925		3.425	44.237	57.41		3.425	42.838	51.797		3.425	43.66	49.181
3.45	46.474	64.996		3.45	43.904	57.005		3.45	43.282	51.967		3.45	43.86	48.785
3.475	46.586	64.69		3.475	43.691	57.272		3.475	43.077	52.03		3.475	43.199	48.612
3.5	46.3	64.958		3.5	44.235	57.043		3.5	43.569	52.016		3.5	43.729	48.936
3.525	46.423	64.685		3.525	43.656	56.677		3.525	43.136	52.364		3.525	44.053	49.064
3.55	46.098	64.504		3.55	44.218	57.346		3.55	43.527	52.432		3.55	43.898	48.911
3.575	46.038	64.442		3.575	44.409	57.211		3.575	43.469	51.928		3.575	43.677	48.869
3.6	45.891	64.429		3.6	44.422	57.334		3.6	43.864	52.674		3.6	44.07	49.189
3.625	46.028	64.583		3.625	44.728	57.564		3.625	43.74	52.588		3.625	44.354	49.182
3.65	46.055	64.354		3.65	44.571	57.827		3.65	44.243	52.777		3.65	44.404	49.541
3.675	45.787	64.164		3.675	44.086	57.147		3.675	43.744	52.761		3.675	44.178	49.067
3.7	46.189	64.372		3.7	44.098	57.17		3.7	43.973	52.573		3.7	43.888	49.359
3.725	46.263	64.621		3.725	44.372	57.422		3.725	43.97	52.657		3.725	44.038	49.101
3.75	46.238	64.452		3.75	43.841	56.939		3.75	44.125	52.889		3.75	43.522	48.877
3.775	46.155	64.615		3.775	43.977	56.872		3.775	43.947	52.888		3.775	43.936	48.693
3.8	46.325	64.4		3.8	44.053	57.126		3.8	44.031	52.921		3.8	44.171	49.075
3.825	46.171	64.581		3.825	43.51	56.308		3.825	43.955	52.442		3.825	43.853	49.363
3.85	46.409	64.648		3.85	43.56	56.207		3.85	44.03	52.421		3.85	43.921	49.171
3.875	45.91	64.386		3.875	43.048	56.498		3.875	43.997	52.674		3.875	44.15	49.508
3.9	45.955	64.199		3.9	43.369	56.073		3.9	43.499	52.559		3.9	44.63	50.006
3.925	45.703	63.838		3.925	43.535	56.86		3.925	43.763	52.176		3.925	44.75	49.844
3.95	45.528	64.196		3.95	43.812	56.998		3.95	43.669	52.262		3.95	44.964	50.023
3.975	45.299	63.274		3.975	43.975	57.322		3.975	43.485	52.268		3.975	44.725	49.946
4	45.18	63.12		4	44.401	57.413		4	43.829	52.478		4	44.722	49.574
4.025	45.326	63.74		4.025	44.517	57.742		4.025	43.82	52.464		4.025	44.539	49.701
4.05	45.282	63.635		4.05	44.503	57.784		4.05	43.502	52		4.05	44.643	49.797
4.075	45.939	63.873		4.075	44.498	57.756		4.075	43.762	52.345		4.075	44.575	49.217
4.1	45.553	63.94		4.1	44.748	57.856		4.1	43.864	52.593		4.1	44.652	50.047
4.125	45.634	64.026		4.125	44.698	57.767		4.125	43.926	52.518		4.125	44.834	50.173
4.15	45.955	64.084		4.15	44.434	57.252		4.15	44.058	52.582		4.15	44.471	49.697
4.175	46.522	64.705		4.175	43.771	57.227		4.175	43.974	52.862		4.175	44.52	49.551
4.2	46.263	64.777		4.2	44.33	57.395		4.2	44.372	52.993		4.2	43.735	48.922
4.225	45.983	64.223		4.225	44.265	57.491		4.225	44.018	52.757		4.225	43.803	48.958
4.25	46.081	64.372		4.25	44.727	57.878		4.25	43.543	52.362		4.25	43.931	48.964
4.275	45.944	64.619		4.275	44.97	57.734		4.275	43.689	52.502		4.275	43.703	49.142
4.3	46.34	64.619		4.3	44.935	58.246		4.3	43.697	52.619		4.3	43.658	48.85
4.325	46.165	64.918		4.325	44.259	57.591		4.325	43.588	52.523		4.325	43.602	48.719
4.35	46.207	64.563		4.35	44.365	57.517		4.35	43.868	52.487		4.35	44.042	48.999
4.375	46.384	64.862		4.375	44.369	57.269		4.375	44.124	53.047		4.375	44.051	49.413
4.4	46.156	64.672		4.4	44.212	57.193		4.4	43.777	52.526		4.4	44.598	49.731
4.425	46.14	64.64		4.425	44.207	57.15		4.425	44.086	53.063		4.425	44.506	49.605
4.45	46.567	64.811		4.45	44.058	56.981		4.45	43.626	52.476		4.45	44.809	49.948
4.475	46.143	64.32		4.475	44.006	57.397		4.475	44.264	52.794		4.475	44.786	49.817
4.5	45.924	64.801		4.5	44.252	57.557		4.5	43.963	52.895		4.5	44.742	49.975
4.525	46.303	64.858		4.525	44.316	57.312		4.525	44.283	52.771		4.525	44.681	50.209
4.55	46.579	65.044		4.55	44.079	57.334		4.55	44.213	53.171		4.55	44.127	49.407
4.575	46.073	64.88		4.575	44.3	57.331		4.575	44.061	53.12		4.575	43.976	48.956
4.6	46.526	64.834		4.6	44.353	57.544		4.6	43.93	52.487		4.6	44.078	49.558
4.625	46.231	64.59		4.625	44.241	57.431		4.625	43.364	52.443		4.625	44.234	49.425
4.65	46.043	64.68		4.65	43.948	57.22		4.65	43.374	52.085		4.65	44.346	49.848
4.675	46.45	65.024		4.675	44.356	57.03		4.675	43.288	51.759		4.675	43.863	49.162
4.7	46.17	64.101		4.7	44.169	57.156		4.7	43.551	52.409		4.7	44.24	49.281
4.725	46.419	64.965		4.725	43.816	56.892		4.725	43.457	52.249		4.725	44.975	49.667
4.75	46.585	65.303		4.75	43.777	56.782		4.75	43.285	51.882		4.75	44.905	49.668
4.775	46.438	64.892		4.775	43.886	57.033		4.775	43.265	52.22		4.775	44.73	50.341
4.8	46.356	64.634		4.8	43.712	56.887		4.8	42.962	51.938		4.8	45.14	50.171
4.825	46.141	64.365		4.825	43.888	56.823		4.825	43.037	51.615		4.825	45.126	50.29
4.85	46.22	64.486		4.85	43.796	56.668		4.85	43.027	51.387		4.85	44.548	49.677
4.875	46.629	64.933		4.875	43.835	56.755		4.875	42.587	51.525		4.875	44.887	49.805
4.9	46.391	65.029		4.9	43.49	56.373		4.9	42.588	51.441		4.9	44.772	49.919
4.925	46.062	64.236		4.925	43.37	56.344		4.925	42.726	50.878		4.925	44.326	49.479
4.95	45.901	63.95		4.95	43.75	57.011		4.95	42.715	51.495		4.95	44.496	50.083
4.975	46.161	64.371		4.975	43.682	56.982		4.975	43.196	51.898		4.975	44.247	49.453
5	45.877	64.474		5	43.856	56.673		5	43.051	51.656		5	44.189	49.279
