# Supplementary material for: The solubility product extends the buffering concept to heterotypic biomolecular condensates
Source: eLife. 2021 Jul 8;10:e67176. doi: 10.7554/eLife.67176 (PMC8289413; doi:10.7554/eLife.67176)
Supplement: Figure 4—source data 1. [file elife-67176-fig4-data1.xlsx]

## Sheet: Sheet1
	A3 - B3				A4 - B4				A5 - B5
Total Conc (uM)	Free A3 (uM)	Free B3 (uM)		Total Conc (uM)	Free A4 (uM)	Free B4 (uM)		Total Conc (uM)	Free A5 (uM)	Free B5 (uM)
50	21.55	21.53		10	6.74	6.74		5	3.62	3.62
100	26.72	26.73		20	9.92	9.93		10	5.51	5.51
125	27.83	27.85		30	11.54	11.54		15	6.53	6.53
150	28.56	28.56		40	12.39	12.38		20	7.04	7.04
175	28.88	28.87		50	12.8	12.83		25	7.32	7.32
200	29.11	29.14		60	12.96	12.97		30	7.41	7.41
220	29.16	29.15		70	13.03	13.02		35	7.44	7.42
240	29.18	29.21		80	13.06	13.04		40	7.43	7.43
260	29.23	29.2		90	13.02	13		45	7.43	7.44
280	29.18	29.19		100	13.02	13		50	7.41	7.42
300	29.2	29.22
