# Supplementary material for: The solubility product extends the buffering concept to heterotypic biomolecular condensates
Source: eLife. 2021 Jul 8;10:e67176. doi: 10.7554/eLife.67176 (PMC8289413; doi:10.7554/eLife.67176)
Supplement: Figure 5—source data 1. [file elife-67176-fig5-data1.xlsx]

## Sheet: 5A
Total A5 (uM)	Free A5 (uM)	Total B3 (uM)	Free B3 (uM)
6	4.08	10	7.94
12	5.99	20	13.18
18	6.88	30	16.84
24	7.26	40	19.54
36	7.35	60	23.15
48	7.08	80	25.38
60	6.67	100	26.83
72	6.33	120	27.9
84	6.02	140	28.76
96	5.77	160	29.53
108	5.58	180	30.23
192	4.79	320	33.41

## Sheet: 5B
FTC = 16 (6, 10) uM			FTC = 32 (12, 20) uM			FTC = 48 (18, 30) uM			FTC = 64 (24, 40) uM			FTC = 96 (36, 60) uM			FTC = 128 (48, 80) uM			FTC = 160 (60, 100) uM			FTC = 192 (72, 120) uM			FTC = 224 (84, 140) uM			FTC = 256 (96, 160) uM
Cluster size	foTM		Cluster size	foTM		Cluster size	foTM		Cluster size	foTM		Cluster size	foTM		Cluster size	foTM		Cluster size	foTM		Cluster size	foTM		Cluster size	foTM		Cluster size	foTM
1	0.750125		1	0.602688		1	0.495375		1	0.419641		1	0.317078		1	0.252945		1	0.208888		1	0.178747		1	0.154319		1	0.138252
2	0.174625		2	0.212594		2	0.2065		2	0.189922		2	0.150615		2	0.120063		2	0.096075		2	0.078		2	0.0659107		2	0.0577695
3	0.054375		3	0.0966094		3	0.11775		3	0.12525		3	0.115687		3	0.0958008		3	0.07905		3	0.0662422		3	0.0564777		3	0.051334
4	0.01325		4	0.043875		4	0.06575		4	0.0749375		4	0.0752708		4	0.0660781		4	0.0550125		4	0.0463125		4	0.0385089		4	0.0351875
5	0.0059375		5	0.0204688		5	0.0395833		5	0.0524219		5	0.0573958		5	0.0516406		5	0.043		5	0.0358854		5	0.0301116		5	0.026748
6	0.00075		6	0.0107812		6	0.023625		6	0.035625		6	0.0435313		6	0.0411328		6	0.0353062		6	0.028875		6	0.0239196		6	0.0218203
7	0.0004375		7	0.00492188		7	0.014875		7	0.0253203		7	0.0341979		7	0.03325		7	0.028		7	0.0237161		7	0.0205313		7	0.0170488
8	0.0005		8	0.003375		8	0.0106667		8	0.01725		8	0.0284583		8	0.0283438		8	0.02355		8	0.0208333		8	0.0173393		8	0.0149219
			9	0.00154687		9	0.0075		9	0.0138516		9	0.0224062		9	0.0239062		9	0.0211781		9	0.0183281		9	0.0150067		9	0.0134473
			10	0.00125		10	0.00708333		10	0.00929687		10	0.0192187		10	0.0207813		10	0.0178437		10	0.0153385		10	0.0135714		10	0.0117383
			11	0.0006875		11	0.00229167		11	0.00773437		11	0.0161563		11	0.0173164		11	0.0160531		11	0.0134349		11	0.0113929		11	0.00941016
			12	0.00075		12	0.00325		12	0.0058125		12	0.0144375		12	0.0152344		12	0.012975		12	0.0124375		12	0.0110625		12	0.00813281
			14	0.00021875		13	0.001625		13	0.00446875		13	0.0121875		13	0.0151328		13	0.0135281		13	0.0103594		13	0.00908259		13	0.00794727
			15	0.000234375		14	0.00116667		14	0.0035		14	0.0083125		14	0.0119219		14	0.0112438		14	0.00984375		14	0.00809375		14	0.00634375
						15	0.000625		15	0.00304688		15	0.00929687		15	0.0110156		15	0.0084375		15	0.009375		15	0.00853795		15	0.00615234
						16	0.000333333		16	0.003125		16	0.00666667		16	0.0116875		16	0.00905		16	0.008875		16	0.00664286		16	0.0060625
						17	0.000354167		17	0.000929687		17	0.00672917		17	0.00916406		17	0.00903125		17	0.0071276		17	0.00679241		17	0.00554492
						18	0.00075		18	0.0016875		18	0.007125		18	0.00928125		18	0.009675		18	0.00684375		18	0.00638839		18	0.00541406
						21	0.0004375		19	0.00148438		19	0.00475		19	0.00912891		19	0.00813437		19	0.00663021		19	0.00538616		19	0.00482422
						22	0.000458333		20	0.0003125		20	0.00427083		20	0.00953125		20	0.0060625		20	0.00692708		20	0.00584821		20	0.00421875
									21	0.00114844		21	0.0039375		21	0.00705469		21	0.00748125		21	0.00574219		21	0.00501563		21	0.00406055
									22	0.000515625		22	0.00401042		22	0.00730469		22	0.0064625		22	0.00464062		22	0.00358482		22	0.00395313
									23	0.000359375		23	0.00323437		23	0.00449219		23	0.00625313		23	0.00610937		23	0.00359375		23	0.00296484
									24	0.0005625		24	0.0025		24	0.00496875		24	0.00375		24	0.00575		24	0.00407143		24	0.00440625
									25	0.000195313		25	0.00234375		25	0.00498047		25	0.006875		25	0.00501302		25	0.00446429		25	0.00292969
									26	0.000203125		26	0.00189583		26	0.004875		26	0.00528125		26	0.00379167		26	0.00388839		26	0.00340234
									27	0.000632813		27	0.00253125		27	0.00485156		27	0.00632813		27	0.00414844		27	0.00307366		27	0.00290039
									28	0.00021875		28	0.00160417		28	0.004375		28	0.0056		28	0.00408333		28	0.0034375		28	0.00273437
									31	0.000242187		29	0.00226562		29	0.00419141		29	0.00534687		29	0.00385156		29	0.0034308		29	0.00243555
									39	0.000304687		30	0.00265625		30	0.00316406		30	0.00365625		30	0.00367187		30	0.00408482		30	0.00316406
												31	0.00209896		31	0.00363281		31	0.00377812		31	0.00427865		31	0.0038058		31	0.00266406
												32	0.000833333		32	0.004		32	0.004		32	0.00308333		32	0.0025		32	0.0025
												33	0.0006875		33	0.00425391		33	0.00464062		33	0.00300781		33	0.00265179		33	0.00212695
												34	0.00123958		34	0.00278906		34	0.0040375		34	0.00371875		34	0.00303571		34	0.00278906
												35	0.000364583		35	0.00287109		35	0.00382812		35	0.00355469		35	0.00289062		35	0.00143555
												36	0.00075		36	0.00323437		36	0.00315		36	0.002625		36	0.00208929		36	0.00161719
												37	0.000770833		37	0.0023125		37	0.00404688		37	0.00221615		37	0.00247768		37	0.00195117
												38	0.00059375		38	0.002375		38	0.00320625		38	0.00227604		38	0.00288393		38	0.00207813
												39	0.00101563		39	0.00426563		39	0.00170625		39	0.00253906		39	0.00235045		39	0.000990234
												40	0.00125		40	0.00140625		40	0.00225		40	0.003125		40	0.00133929		40	0.00125
												41	0.000854167		41	0.00160156		41	0.00269062		41	0.00224219		41	0.0015558		41	0.0018418
												42	0.00021875		42	0.00164062		42	0.00249375		42	0.00284375		42	0.00178125		42	0.00172266
												43	0.000895833		43	0.00167969		43	0.00255312		43	0.00179167		43	0.00134375		43	0.00235156
												44	0.000916667		44	0.00189062		44	0.0015125		44	0.00229167		44	0.000982143		44	0.00120312
												45	0.00046875		45	0.00140625		45	0.00210937		45	0.00164062		45	0.00251116		45	0.00105469
												46	0.000479167		46	0.00197656		46	0.0014375		46	0.00203646		46	0.0014375		46	0.000808594
												47	0.000244792		47	0.00183594		47	0.0017625		47	0.00342708		47	0.0019933		47	0.00137695
												48	0.0005		48	0.00225		48	0.0021		48	0.002		48	0.00192857		48	0.0016875
												49	0.00102083		49	0.00133984		49	0.00199062		49	0.00165885		49	0.00142187		49	0.00162695
												50	0.000520833		50	0.000976562		50	0.00171875		50	0.0015625		50	0.00111607		50	0.00136719
												52	0.000270833		51	0.00179297		51	0.00159375		51	0.00172656		51	0.00147991		51	0.000996094
												53	0.000552083		52	0.00101563		52	0.0014625		52	0.00176042		52	0.00127679		52	0.00111719
												54	0.00028125		53	0.00144922		53	0.00165625		53	0.00234635		53	0.00141964		53	0.0013457
												56	0.000291667		54	0.00147656		54	0.002025		54	0.00225		54	0.00120536		54	0.00105469
												57	0.000296875		55	0.000644531		55	0.0020625		55	0.00214844		55	0.00147321		55	0.000966797
												62	0.000645833		56	0.00240625		56	0.001925		56	0.00189583		56	0.0015		56	0.00109375
												69	0.000359375		57	0.00155859		57	0.00267188		57	0.00163281		57	0.00127232		57	0.000779297
												70	0.000364583		58	0.000453125		58	0.0010875		58	0.00241667		58	0.000776786		58	0.00101953
												85	0.000442708		59	0.000691406		59	0.0022125		59	0.00122917		59	0.00184375		59	0.00115234
															60	0.000703125		60	0.0020625		60	0.0015625		60	0.00133929		60	0.00105469
															61	0.000714844		61	0.00190625		61	0.00142969		61	0.00163393		61	0.000714844
															62	0.00096875		62	0.000775		62	0.00113021		62	0.00179911		62	0.00121094
															63	0.000492188		63	0.00118125		63	0.00065625		63	0.000984375		63	0.000615234
															64	0.0005		64	0.0012		64	0.00116667		64	0.000571429		64	0.000375
															65	0.00152344		65	0.0024375		65	0.00220052		65	0.000725446		65	0.00101563
															66	0.000773438		66	0.00226875		66	0.0020625		66	0.000589286		66	0.000902344
															67	0.00130859		67	0.00125625		67	0.00122135		67	0.000747768		67	0.00117773
															68	0.0010625		68	0.0017		68	0.00053125		68	0.00136607		68	0.000265625
															69	0.00107813		69	0.00194063		69	0.00071875		69	0.00154018		69	0.000539063
															70	0.000546875		70	0.00175		70	0.00127604		70	0.00140625		70	0.000546875
															71	0.000832031		71	0.00133125		71	0.00110937		71	0.000633929		71	0.000554687
															72	0.0005625		72	0.0018		72	0.0015		72	0.000964286		72	0.001125
															73	0.000570312		73	0.00114062		73	0.00152083		73	0.000814732		73	0.000570312
															75	0.000878906		74	0.00069375		74	0.000385417		74	0.00132143		74	0.00115625
															76	0.0011875		75	0.001875		75	0.000976562		75	0.00100446		75	0.000585937
															77	0.00150391		76	0.0002375		76	0.0011875		76	0.00152679		76	0.000742188
															78	0.000609375		77	0.0028875		77	0.000601562		77	0.0006875		77	0.000902344
															80	0.00125		78	0.00121875		78	0.0008125		78	0.000870536		78	0.000761719
															81	0.000316406		79	0.00172813		79	0.00123438		79	0.000705357		79	0.000771484
															83	0.000648438		80	0.00025		80	0.00166667		80	0.00107143		80	0.0009375
															84	0.00065625		81	0.00177188		81	0.0016875		81	0.000542411		81	0.000158203
															85	0.000996094		82	0.0005125		82	0.000640625		82	0.000732143		82	0.000640625
															87	0.000679687		83	0.0010375		83	0.000648437		83	0.000926339		83	0.00129688
															88	0.0006875		84	0.0021		84	0.00109375		84	0.00075		84	0.000492188
															90	0.000351562		85	0.00159375		85	0.000221354		85	0.000758929		85	0.000498047
															91	0.000710937		86	0.00080625		86	0.000895833		86	0.000959821		86	0.000671875
															92	0.000359375		87	0.0010875		87	0.00135937		87	0.000582589		87	0.000679687
															95	0.000742188		88	0.0011		88	0.0006875		88	0.000196429		88	0.0006875
															98	0.00114844		89	0.00166875		89	0.000927083		89	0.000595982		89	0.000695312
															99	0.000773438		90	0.00140625		90	0.00046875		90	0.00100446		90	0.00158203
															100	0.00117187		91	0.0011375		91	0.000947917		91	0.0008125		91	0.000355469
															101	0.000394531		92	0.0008625		92	0.000479167		92	0.000821429		92	0.000539063
															103	0.000402344		93	0.00145312		93	0.00121094		93	0.000622768		94	0.000917969
															105	0.000410156		94	0.0005875		94	0.00122396		94	0.00146875		95	0.00111328
															106	0.000414062		95	0.000890625		95	0.000989583		95	0.000848214		96	0.0001875
															112	0.0004375		96	0.0015		96	0.0005		96	0.000857143		97	0.000568359
															113	0.000441406		97	0.00060625		97	0.000757813		97	0.000433036		98	0.000765625
															114	0.000445313		98	0.001225		98	0.000765625		98	0.00021875		99	0.000386719
															115	0.000449219		99	0.0012375		99	0.000773438		99	0.000441964		100	0.000195313
															118	0.000460937		100	0.0003125		100	0.00104167		100	0.000223214		101	0.000394531
															121	0.000472656		101	0.000315625		101	0.000263021		101	0.000676339		102	0.000199219
															128	0.0005		103	0.00160937		102	0.00053125		102	0.00136607		103	0.000201172
															130	0.000507813		105	0.00196875		103	0.000804687		103	0.000229911		104	0.0008125
															131	0.000511719		106	0.00099375		104	0.000541667		104	0.000464286		105	0.000205078
															135	0.000527344		107	0.00100312		105	0.00109375		105	0.0009375		107	0.000208984
															149	0.000582031		108	0.000675		106	0.00165625		106	0.000946429		108	0.000210937
															156	0.000609375		109	0.000340625		107	0.000557292		107	0.000477679		109	0.000212891
															164	0.000640625		110	0.00034375		108	0.0005625		108	0.0016875		110	0.000429688
															165	0.000644531		111	0.0013875		109	0.000283854		109	0.000243304		111	0.000433594
															166	0.00129688		112	0.00035		110	0.000572917		110	0.000982143		113	0.000662109
															180	0.000703125		113	0.00070625		111	0.00144531		111	0.000495536		115	0.000224609
																		114	0.00035625		112	0.000875		112	0.00075		116	0.00090625
																		115	0.00107813		113	0.000588542		113	0.000756696		117	0.000228516
																		116	0.0003625		114	0.00059375		114	0.00127232		118	0.000460937
																		117	0.000365625		115	0.000898437		115	0.000256696		119	0.000697266
																		118	0.0007375		116	0.000302083		116	0.000517857		122	0.000953125
																		119	0.00111563		118	0.00122917		117	0.000522321		123	0.000240234
																		120	0.000375		119	0.000929687		118	0.000526786		124	0.000242187
																		121	0.0015125		120	0.0021875		120	0.000535714		125	0.000244141
																		123	0.00076875		121	0.000945312		121	0.000810268		126	0.000492188
																		124	0.000775		122	0.000953125		122	0.000272321		127	0.000248047
																		125	0.00117187		124	0.000645833		123	0.000549107		128	0.00075
																		126	0.0007875		125	0.00130208		125	0.00111607		131	0.000511719
																		127	0.000396875		126	0.000984375		128	0.000857143		132	0.000257813
																		128	0.0008		127	0.000992188		130	0.000290179		133	0.000259766
																		129	0.00120937		128	0.000666667		131	0.000584821		134	0.000523438
																		131	0.00122813		130	0.000338542		133	0.000296875		135	0.000527344
																		132	0.0012375		131	0.000341146		134	0.000598214		136	0.000796875
																		133	0.0016625		134	0.000348958		135	0.000301339		139	0.000271484
																		134	0.00041875		135	0.000351562		136	0.000303571		140	0.000546875
																		135	0.000421875		136	0.000708333		139	0.000620536		142	0.000832031
																		136	0.00085		137	0.000713542		140	0.0003125		144	0.0005625
																		137	0.000428125		138	0.00179687		141	0.000629464		146	0.000285156
																		138	0.00129375		139	0.00108594		143	0.000319196		147	0.000861328
																		140	0.000875		140	0.000729167		144	0.000642857		148	0.000578125
																		141	0.00088125		143	0.000372396		145	0.000970982		151	0.000589844
																		142	0.001775		144	0.001125		146	0.000977679		152	0.000296875
																		143	0.00089375		145	0.000755208		147	0.00065625		153	0.000298828
																		144	0.00135		146	0.000760417		149	0.000665179		157	0.000919922
																		145	0.00090625		147	0.00114844		150	0.000334821		158	0.000308594
																		146	0.0009125		150	0.00078125		151	0.000337054		159	0.000931641
																		148	0.0013875		151	0.000393229		152	0.000339286		160	0.0003125
																		149	0.000465625		155	0.000807292		153	0.000683036		161	0.000314453
																		152	0.001425		156	0.00040625		154	0.0006875		163	0.000318359
																		156	0.0004875		158	0.000822917		155	0.000345982		167	0.000326172
																		159	0.000496875		160	0.000833333		156	0.000696429		168	0.000328125
																		160	0.0005		162	0.00084375		158	0.00141071		170	0.000664063
																		161	0.00100625		163	0.000424479		160	0.000357143		171	0.000333984
																		162	0.0010125		164	0.000427083		161	0.00107813		172	0.000335937
																		164	0.001025		167	0.000434896		162	0.000361607		173	0.000337891
																		165	0.000515625		168	0.000875		166	0.000741071		174	0.000339844
																		166	0.00051875		169	0.000880208		169	0.000377232		175	0.000341797
																		167	0.000521875		170	0.000442708		170	0.000758929		176	0.00034375
																		169	0.000528125		171	0.00133594		171	0.000381696		178	0.000347656
																		170	0.00053125		172	0.000447917		172	0.00115179		179	0.000349609
																		172	0.0005375		174	0.00090625		173	0.000772321		180	0.000351562
																		173	0.000540625		175	0.00136719		174	0.00116518		182	0.000355469
																		175	0.000546875		176	0.000916667		175	0.00195312		183	0.000714844
																		176	0.00055		177	0.000460937		176	0.000392857		185	0.000361328
																		178	0.00055625		178	0.000463542		178	0.000794643		187	0.000365234
																		180	0.0005625		180	0.00140625		179	0.000399554		189	0.000738281
																		181	0.00113125		181	0.000942708		181	0.000404018		190	0.000371094
																		182	0.00056875		182	0.000473958		182	0.00121875		191	0.000373047
																		183	0.000571875		184	0.000479167		183	0.00122545		192	0.000375
																		184	0.00115		186	0.000484375		185	0.000412946		193	0.000376953
																		185	0.000578125		189	0.000984375		186	0.000415179		194	0.00113672
																		187	0.000584375		190	0.000494792		187	0.000417411		195	0.000380859
																		188	0.0005875		192	0.0005		188	0.000419643		196	0.000382813
																		190	0.00059375		196	0.000510417		189	0.000421875		199	0.000777344
																		192	0.0006		200	0.000520833		190	0.000424107		200	0.000390625
																		195	0.00121875		203	0.000528646		191	0.000852679		202	0.000394531
																		198	0.0012375		204	0.00053125		194	0.000433036		203	0.000396484
																		200	0.000625		205	0.000533854		197	0.000879464		204	0.000398437
																		203	0.000634375		206	0.00107292		199	0.000444196		205	0.000800781
																		205	0.00128125		209	0.000544271		200	0.000446429		209	0.000408203
																		207	0.00129375		210	0.00164062		201	0.000897321		211	0.000412109
																		209	0.000653125		211	0.00164844		202	0.000450893		212	0.000414062
																		215	0.000671875		212	0.00220833		203	0.000453125		213	0.000416016
																		219	0.000684375		213	0.00166406		204	0.000455357		215	0.000419922
																		222	0.00069375		214	0.00167187		205	0.000915179		216	0.00084375
																		223	0.000696875		216	0.0005625		207	0.000462054		217	0.000423828
																		228	0.001425		217	0.000565104		208	0.000464286		219	0.000427734
																		229	0.000715625		221	0.000575521		209	0.000466518		220	0.000429688
																		232	0.00145		222	0.000578125		210	0.0009375		221	0.000431641
																		235	0.000734375		223	0.000580729		211	0.000941964		222	0.000433594
																		236	0.001475		224	0.000583333		213	0.000950893		226	0.000441406
																		244	0.0007625		225	0.000585937		214	0.000477679		227	0.000443359
																		246	0.00076875		227	0.00118229		218	0.000486607		228	0.000445313
																		247	0.000771875		228	0.00059375		220	0.000491071		230	0.000449219
																		250	0.00078125		229	0.000596354		221	0.000493304		233	0.000455078
																		251	0.000784375		231	0.000601562		223	0.000497768		234	0.000457031
																		252	0.0007875		233	0.000606771		224	0.0005		238	0.000464844
																		253	0.000790625		236	0.000614583		225	0.000502232		240	0.0009375
																		261	0.00244687		237	0.000617188		226	0.000504464		243	0.000474609
																		267	0.000834375		238	0.000619792		227	0.000506696		244	0.000476562
																		268	0.001675		239	0.00124479		236	0.00158036		246	0.000480469
																		269	0.000840625		240	0.000625		238	0.00053125		251	0.000490234
																		277	0.00173125		241	0.000627604		239	0.000533482		252	0.000492188
																		279	0.000871875		245	0.000638021		240	0.000535714		253	0.000494141
																		298	0.00093125		246	0.000640625		242	0.000540179		258	0.000503906
																		316	0.0009875		247	0.000643229		243	0.000542411		259	0.000505859
																		325	0.00101563		248	0.000645833		246	0.000549107		277	0.000541016
																		326	0.00101875		250	0.000651042		251	0.000560268		282	0.000550781
																		328	0.001025		253	0.00131771		253	0.000564732		285	0.000556641
																		332	0.0010375		254	0.000661458		255	0.000569196		288	0.0005625
																		335	0.00104688		257	0.000669271		259	0.000578125		295	0.00115234
																		337	0.00105313		258	0.000671875		263	0.000587054		296	0.000578125
																		341	0.00106562		259	0.000674479		266	0.00059375		304	0.00059375
																		346	0.00108125		261	0.00135937		268	0.000598214		306	0.000597656
																		348	0.0010875		262	0.000682292		269	0.000600446		309	0.000603516
																		358	0.00111875		263	0.00136979		273	0.000609375		315	0.000615234
																		362	0.00113125		269	0.000700521		279	0.000622768		316	0.000617188
																		375	0.00117187		271	0.000705729		281	0.000627232		321	0.000626953
																		395	0.00123438		275	0.00214844		291	0.000649554		330	0.000644531
																		401	0.00125312		277	0.000721354		292	0.00195536		332	0.000648438
																		418	0.00130625		278	0.000723958		293	0.000654018		333	0.000650391
																					280	0.000729167		294	0.00065625		336	0.00065625
																					281	0.000731771		295	0.00197545		338	0.000660156
																					284	0.000739583		299	0.000667411		342	0.00133594
																					286	0.00297917		302	0.00134821		343	0.000669922
																					288	0.00075		305	0.000680804		346	0.000675781
																					289	0.000752604		311	0.000694196		361	0.000705078
																					290	0.000755208		314	0.000700893		362	0.00141406
																					292	0.000760417		315	0.000703125		363	0.000708984
																					293	0.000763021		321	0.000716518		364	0.000710937
																					294	0.000765625		322	0.00071875		370	0.000722656
																					296	0.0023125		323	0.000720982		376	0.000734375
																					299	0.00155729		324	0.00144643		382	0.000746094
																					306	0.000796875		327	0.000729911		384	0.00075
																					307	0.00159896		329	0.000734375		387	0.000755859
																					309	0.00160937		330	0.000736607		422	0.000824219
																					313	0.000815104		331	0.000738839		424	0.000828125
																					318	0.00165625		334	0.000745536		426	0.000832031
																					326	0.000848958		337	0.000752232		432	0.00084375
																					331	0.000861979		343	0.000765625		443	0.000865234
																					333	0.000867188		346	0.000772321		444	0.000867188
																					336	0.000875		348	0.00233036		448	0.000875
																					337	0.000877604		351	0.000783482		449	0.000876953
																					338	0.00176042		352	0.000785714		460	0.000898438
																					341	0.000888021		358	0.00159821		469	0.000916016
																					343	0.000893229		360	0.00160714		471	0.000919922
																					346	0.000901042		362	0.000808036		474	0.000925781
																					348	0.00090625		363	0.000810268		476	0.000929687
																					350	0.00182292		364	0.0008125		481	0.000939453
																					353	0.000919271		367	0.000819196		495	0.000966797
																					354	0.000921875		375	0.000837054		500	0.000976562
																					361	0.000940104		377	0.000841518		505	0.000986328
																					364	0.00189583		379	0.000845982		506	0.000988281
																					369	0.00192187		388	0.000866071		530	0.00103516
																					371	0.00193229		391	0.000872768		534	0.00104297
																					374	0.000973958		392	0.000875		536	0.00104688
																					375	0.000976562		397	0.00177232		542	0.00105859
																					376	0.000979167		402	0.000897321		548	0.00214063
																					377	0.000981771		407	0.00272545		549	0.00214453
																					381	0.000992188		416	0.000928571		556	0.00108594
																					384	0.001		419	0.000935268		587	0.00114648
																					388	0.00101042		422	0.000941964		598	0.00116797
																					391	0.00203646		424	0.000946429		602	0.00117578
																					395	0.00102865		425	0.000948661		616	0.00120312
																					396	0.0020625		426	0.000950893		617	0.00120508
																					400	0.00104167		427	0.000953125		621	0.00121289
																					401	0.00104427		434	0.00096875		624	0.00121875
																					412	0.00107292		436	0.000973214		625	0.0012207
																					422	0.00109896		440	0.000982143		630	0.00123047
																					425	0.00110677		449	0.00100223		636	0.00124219
																					426	0.00110937		461	0.00102902		653	0.00255078
																					431	0.0011224		463	0.00103348		659	0.00128711
																					435	0.00113281		471	0.00105134		661	0.00129102
																					436	0.00113542		472	0.00105357		662	0.00129297
																					438	0.00114062		473	0.0010558		665	0.00129883
																					443	0.00115365		476	0.0010625		669	0.00130664
																					447	0.00116406		477	0.00106473		671	0.00131055
																					448	0.00116667		478	0.00106696		672	0.0013125
																					449	0.00116927		482	0.00107589		675	0.00131836
																					452	0.00117708		484	0.00108036		678	0.00132422
																					456	0.0011875		488	0.00108929		680	0.00265625
																					458	0.00119271		493	0.00110045		691	0.00134961
																					459	0.00119531		497	0.00221875		696	0.00135937
																					462	0.00120312		498	0.00111161		700	0.00136719
																					466	0.00121354		504	0.001125		704	0.001375
																					472	0.00122917		506	0.00112946		706	0.00137891
																					474	0.00123438		507	0.0011317		710	0.00138672
																					475	0.00123698		511	0.00114062		730	0.00142578
																					483	0.00125781		512	0.00114286		741	0.00144727
																					486	0.00126563		513	0.00114509		743	0.00145117
																					488	0.00254167		519	0.00115848		746	0.00145703
																					489	0.00127344		522	0.00116518		754	0.00147266
																					500	0.00260417		525	0.00117187		755	0.00147461
																					508	0.00132292		526	0.00117411		769	0.00150195
																					509	0.00132552		529	0.0011808		776	0.00303125
																					511	0.00133073		537	0.00119866		782	0.00152734
																					512	0.00133333		538	0.00120089		784	0.00153125
																					519	0.00135156		541	0.00120759		795	0.00155273
																					520	0.00135417		543	0.00121205		799	0.00156055
																					524	0.00136458		545	0.00121652		804	0.00157031
																					526	0.00136979		549	0.00245089		805	0.00157227
																					529	0.0013776		551	0.00122991		806	0.00157422
																					534	0.00278125		553	0.00123438		811	0.00158398
																					546	0.00142187		555	0.00123884		824	0.00160937
																					547	0.00142448		564	0.00125893		831	0.00324609
																					552	0.0014375		568	0.00253571		834	0.00162891
																					560	0.00145833		577	0.00257589		836	0.00163281
																					561	0.00146094		581	0.00129688		839	0.00327734
																					572	0.00148958		584	0.00130357		840	0.00164062
																					578	0.00150521		590	0.00131696		843	0.00164648
																					580	0.00151042		593	0.00132366		846	0.00165234
																					581	0.00151302		597	0.00133259		849	0.0016582
																					583	0.00151823		598	0.00266964		851	0.00166211
																					590	0.00153646		602	0.00134375		859	0.00167773
																					592	0.00154167		605	0.00135045		863	0.00337109
																					603	0.00157031		607	0.00135491		866	0.00169141
																					605	0.00315104		610	0.00136161		870	0.00169922
																					606	0.00157813		612	0.00136607		875	0.00170898
																					645	0.00335937		614	0.00137054		877	0.00171289
																					676	0.00176042		615	0.00137277		880	0.0034375
																					677	0.00176302		618	0.00137946		881	0.0017207
																					698	0.00181771		620	0.00138393		887	0.00173242
																					799	0.00208073		627	0.00139955		895	0.00174805
																					805	0.00209635		634	0.00141518		898	0.00175391
																					811	0.00211198		639	0.00142634		907	0.00177148
																					826	0.00215104		641	0.0014308		908	0.00177344
																								644	0.0014375		912	0.00178125
																								645	0.00143973		913	0.0017832
																								649	0.00144866		922	0.00540234
																								653	0.00145759		923	0.00180273
																								655	0.00146205		924	0.00180469
																								656	0.00146429		927	0.00181055
																								657	0.00146652		928	0.0018125
																								662	0.00147768		935	0.00182617
																								664	0.00296429		944	0.00184375
																								667	0.00148884		946	0.00184766
																								670	0.00149554		952	0.00185937
																								674	0.00150446		958	0.00187109
																								677	0.00151116		965	0.0056543
																								680	0.00151786		977	0.0019082
																								681	0.00152009		978	0.00191016
																								685	0.00152902		979	0.00191211
																								688	0.00153571		988	0.00192969
																								689	0.00153795		989	0.00193164
																								691	0.00308482		990	0.00193359
																								705	0.00157366		995	0.00194336
																								711	0.00158705		996	0.00194531
																								715	0.00159598		997	0.00194727
																								716	0.00159821		998	0.00194922
																								720	0.00160714		1003	0.00195898
																								728	0.001625		1009	0.00394141
																								730	0.00162946		1010	0.00197266
																								747	0.00166741		1015	0.00198242
																								751	0.00335268		1020	0.00199219
																								753	0.0016808		1021	0.00199414
																								755	0.00337054		1025	0.00200195
																								756	0.0016875		1026	0.00200391
																								762	0.00170089		1032	0.00201563
																								763	0.00170312		1033	0.00201758
																								766	0.00170982		1036	0.00202344
																								784	0.00175		1038	0.00608203
																								787	0.0017567		1039	0.0020293
																								789	0.00176116		1048	0.00204688
																								793	0.00177009		1051	0.00410547
																								798	0.00178125		1073	0.0020957
																								800	0.00178571		1081	0.00211133
																								805	0.00179688		1083	0.00211523
																								813	0.00362946		1084	0.00211719
																								815	0.0018192		1090	0.00212891
																								823	0.00183705		1091	0.00213086
																								828	0.00184821		1093	0.00213477
																								829	0.00185045		1095	0.00213867
																								838	0.00187054		1097	0.00428516
																								839	0.00187277		1098	0.00214453
																								841	0.00187723		1100	0.00429688
																								844	0.00188393		1101	0.00215039
																								849	0.00379018		1110	0.00216797
																								853	0.00190402		1112	0.00434375
																								862	0.00577232		1122	0.00219141
																								864	0.00192857		1135	0.0022168
																								877	0.00195759		1136	0.00221875
																								880	0.00196429		1139	0.00444922
																								890	0.00198661		1141	0.00222852
																								902	0.00201339		1142	0.00223047
																								907	0.00202455		1145	0.00223633
																								916	0.00408929		1150	0.00224609
																								917	0.00204688		1151	0.00224805
																								919	0.00205134		1154	0.00225391
																								928	0.00207143		1173	0.00229102
																								930	0.00207589		1174	0.00229297
																								931	0.00207813		1181	0.00461328
																								938	0.00209375		1182	0.00230859
																								946	0.00422321		1183	0.00231055
																								951	0.00212277		1189	0.00232227
																								960	0.00214286		1191	0.00232617
																								963	0.00214955		1192	0.00232812
																								969	0.00216295		1193	0.00233008
																								986	0.00220089		1194	0.00233203
																								1038	0.00231696		1202	0.00234766
																								1041	0.00232366		1204	0.00235156
																								1052	0.00234821		1224	0.00239062
																								1092	0.0024375		1226	0.00239453
																								1188	0.00265179		1233	0.0024082
																											1235	0.00241211
																											1239	0.00241992
																											1240	0.00242187
																											1241	0.00242383
																											1244	0.00242969
																											1247	0.00243555
																											1251	0.00244336
																											1260	0.00246094
																											1268	0.00247656
																											1272	0.00248438
																											1278	0.00249609
																											1280	0.0025
																											1281	0.00250195
																											1287	0.00251367
																											1289	0.00251758
																											1292	0.00252344
																											1308	0.00255469
																											1318	0.00257422
																											1348	0.00263281
																											1353	0.00264258
																											1449	0.00283008
