# Supplementary material for: The solubility product extends the buffering concept to heterotypic biomolecular condensates
Source: eLife. 2021 Jul 8;10:e67176. doi: 10.7554/eLife.67176 (PMC8289413; doi:10.7554/eLife.67176)
Supplement: Figure 6—source data 1. [file elife-67176-fig6-data1.xlsx]

## Sheet: 6 (A-D)
Total A3	Free A3	Total B1-3	Free B1-3	Total C6	Free C6
1	0.42	120	28.18	60	3.36
5	2.15	120	27.5	60	3.37
10	4.39	120	26.69	60	3.38
20	9.18	120	25.23	60	3.4
40	19.72	120	22.59	60	3.43
60	31.51	120	20.39	60	3.46
80	44.3	120	18.5	60	3.47
100	58.02	120	16.9	60	3.46
120	72.48	120	15.51	60	3.47
140	87.66	120	14.51	60	3.48
160	103.33	120	13.29	60	3.48
180	119.49	120	12.38	60	3.49
200	136.04	120	11.58	60	3.49
	All units are in uM

## Sheet: 6D
Total A3	Total B1-3	Total C6	Free A3	Free B1-3	Free C6
1	3	1.5	0.98	2.76	1.29
2	6	3	1.9	5.11	2.25
5	15	7.5	4.43	10.4	3.91
10	30	15	7.95	15.6	4.73
20	60	30	13.15	20.16	4.47
30	90	45	16.87	21.74	3.85
40	120	60	19.7	22.63	3.44
50	150	75	21.99	23.14	3.15
60	180	90	23.86	23.55	2.95
70	210	105	25.61	23.9	2.82
	All units are in uM
