# Supplementary material for: The solubility product extends the buffering concept to heterotypic biomolecular condensates
Source: eLife. 2021 Jul 8;10:e67176. doi: 10.7554/eLife.67176 (PMC8289413; doi:10.7554/eLife.67176)
Supplement: Figure 7—source data 1. [file elife-67176-fig7-data1.xlsx]

## Sheet: 7C
	CMC = 16.7 uM				CMC = 17.85 uM				CMC = 18 uM
Time (ms)	Total A4 (uM)	Total B4 (uM)		Time (ms)	Total A4 (uM)	Total B4 (uM)		Time (ms)	Total A4 (uM)	Total B4 (uM)
0	0.755	0.755		0	1.384	1.384		0	1.384	1.384
5.00001	29.0222	27.8444		2.00001	18.9608	20.0957		2.00001	19.2653	18.0197
10	41.4646	41.6307		4.00001	29.064	29.3962		4.00001	29.1747	27.763
15	49.679	49.6941		6.00001	36.759	36.5099		6.00001	36.067	35.7349
20	56.2475	54.6771		8.00001	44.3157	43.1808		8.00001	43.4299	42.5718
25	60.9738	61.1852		10	50.7098	50.8758		10	48.6614	47.6926
30	64.9753	63.6767		12	56.4672	56.3011		12	55.969	53.6438
35	67.3611	69.158		14	60.8683	61.2005		14	57.0762	58.1557
40	70.6529	70.3811		16	63.6086	63.2765		16	62.8059	62.2523
45	70.9398	70.3811		18	67.7053	66.2936		18	65.3525	64.6051
50	71.4985	71.4834		20	69.7536	68.8955		20	70.4456	68.9786
55	73.5672	73.7333		22	73.5181	73.9333		22	74.9574	72.743
60	74.2467	73.9598		24	75.8432	75.8986		24	77.7531	78.3067
65	74.3826	74.141		26	78.4174	78.9987		26	79.8014	80.8256
70	74.5638	73.2803		28	81.2962	80.7702		28	81.7114	81.7667
75	74.2769	74.1259		30	83.1507	83.3445		30	82.7909	85.7803
80	74.6091	74.7903		32	84.507	85.3098		32	86.8598	88.4376
85	74.2014	75.6661		34	87.6072	86.8875		34	88.8251	88.7974
90	74.3222	76.1946		36	88.2715	88.2438		36	91.7315	91.3717
95	74.6846	74.9564		38	90.1261	88.9082		38	92.8387	92.3405
100	74.2769	73.4615		40	91.6208	92.1467		40	94.5826	93.8075
105	74.9715	75.6812		42	93.8629	93.6138		42	95.7174	97.4059
110	77.4479	76.9647		44	94.6102	94.7486		44	96.963	98.5685
115	77.2063	76.1946		46	95.6621	97.5997		46	98.9837	98.5962
120	76.1946	76.3154		48	97.5997	97.8488		48	98.6792	99.7864
125	77.1912	77.4479		50	98.6238	99.3158		50	100.894	99.6757
130	77.8405	76.859		52	101.779	100.368		52	102.139	101.696
135	77.9009	78.671		54	102.056	102.278		54	104.686	104.16
140	79.0787	78.4747		56	103.772	101.807		56	104.437	104.935
145	79.8941	80.3471		58	104.326	102.25		58	107.343	107.62
150	79.3958	78.4898		60	103.855	103.219		60	106.236	109.032
155	77.1308	78.8975		62	105.101	106.734		62	107.094	109.17
160	77.7499	77.5838		64	107.814	105.959		64	110.554	109.917
165	77.8405	78.2029		66	107.509	107.786		66	111.024	111.883
170	76.9647	77.9462		68	109.779	108.727		68	110.914	111.052
175	78.5653	78.671		70	111.467	111.883		70	112.547	112.962
180	79.2297	79.3052		72	113.156	113.1		72	114.54	114.54
185	79.0787	79.5921		74	113.792	114.374		74	114.125	116.644
190	79.2146	79.4411		76	114.208	115.204		76	116.256	116.422
195	79.0334	78.0368		78	116.339	115.536		78	117.391	115.287
200	79.0183	78.4747		80	118.415	118.138		80	116.92	115.481
205	78.1274	78.3388		82	119.827	120.436		82	117.225	117.391
210	78.6559	77.9311		84	121.681	122.899		84	115.924	118.138
215	78.4294	78.5502		86	123.01	123.425		86	116.201	117.64
220	78.52	77.7046		88	122.872	124.366		88	115.758	116.062
225	76.9194	77.4177		90	122.872	122.982		90	117.944	116.422
230	78.1878	77.8405		92	123.231	124.089		92	119.245	117.723
235	78.5049	78.5502		94	125.473	122.955		94	119.522	120.297
240	77.3573	78.6408		96	123.702	123.647		96	119.495	122.041
245	79.1844	79.3656		98	123.536	123.84		98	121.128	121.792
250	79.7129	80.1357		100	123.148	124.92		100	120.242	121.737
255	78.3992	78.8975		102	125.252	125.307		102	121.211	122.844
260	78.5653	79.5317		104	124.726	124.2		104	123.757	120.768
265	77.4781	77.0402		106	125.501	123.591		106	121.654	123.01
270	77.312	77.5687		108	125.473	123.868		108	123.868	123.121
275	75.6661	76.3607		110	125.64	124.311		110	124.283	123.813
280	75.0017	75.7114		112	125.501	125.141		112	123.342	124.394
285	75.4547	75.8322		114	123.757	125.916		114	122.013	124.975
290	75.9228	76.0889		116	124.975	126.747		116	123.813	123.093
295	75.4245	76.3456		118	126.11	126.193		118	124.671	125.833
300	77.614	78.3992		120	126.47	127.134		120	126.387	126.913
305	79.5317	76.708		122	126.387	125.058		122	126.276	125.28
310	77.5234	77.9764		124	125.529	125.252		124	125.999	123.259
315	78.1123	78.3539		126	125.169	125.169		126	124.283	124.92
320	78.2331	77.7801		128	127.217	128.463		128	126.193	125.141
325	78.0821	77.9462		130	127.383	130.013		130	125.169	124.837
330	77.1761	76.7986		132	129.016	127.716		132	124.422	124.809
335	77.9009	77.2214		134	129.819	128.324		134	125.114	125.556
340	78.5351	79.0938		136	129.487	129.183		136	125.999	126.553
345	78.7163	77.4177		138	129.349	130.484		138	126.359	125.529
350	76.4815	75.5755		140	131.812	130.788		140	126.47	127.439
355	76.9496	75.6359		142	131.646	130.013		142	127.217	126.47
360	77.3875	77.4026		144	130.151	130.567		144	127.273	127.134
365	75.7416	76.1191		146	129.958	131.314		146	129.266	127.522
370	76.6929	75.8624		148	129.598	131.092		148	128.435	129.847
375	76.708	76.7835		150	130.345	129.93		150	126.276	127.632
380	75.9983	77.01		152	132.476	131.591		152	128.767	126.415
385	76.9647	76.0436		154	133.335	130.622		154	129.958	127.3
390	77.2516	76.6778		156	134.054	132.255		156	129.764	128.38
395	77.312	77.7499		158	135.66	133.335		158	130.262	130.207
400	77.1761	77.5234		160	137.957	135.743		160	130.76	130.76
405	78.3237	77.5838		162	137.902	137.044		162	129.625	131.286
410	78.5653	78.8673		164	138.068	136.961		164	131.342	131.369
415	77.463	79.4713		166	137.736	136.462		166	133.058	130.567
420	76.557	75.6057		168	137.597	136.822		168	131.563	130.982
425	76.7835	78.2935		170	137.874	137.182		170	131.674	130.899
430	76.0436	78.0972		172	138.123	137.21		172	132.061	132.892
435	77.765	76.8288		174	138.621	136.905		174	133.39	132.615
440	78.6257	78.5955		176	138.621	136.988		176	134.746	133.002
445	79.275	78.2784		178	137.016	137.071		178	135.078	134.636
450	77.4781	78.7465		180	136.075	136.739		180	133.722	136.518
455	77.3724	77.1912		182	136.573	136.518		182	134.22	135.161
460	76.6174	77.0704		184	139.203	138.372		184	136.601	136.213
465	76.406	76.9194		186	138.788	137.708		186	136.628	136.352
470	76.2701	76.8137		188	137.763	137.459		188	136.103	136.739
475	75.8926	76.0889		190	137.902	136.85		190	138.649	135.494
480	76.2852	74.6091		192	138.788	138.096		192	139.009	134.829
485	76.5117	76.3758		194	140.088	139.341		194	138.372	137.597
490	75.8775	76.3154		196	139.646	141.611		196	138.428	137.653
495	75.5906	75.9077		198	141.998	139.867		198	138.012	138.372
500	75.5302	75.0017		200	141.002	140.836		200	137.32	139.092
505	76.4211	75.5604		202	140.504	142.248		202	139.037	139.812
510	75.5604	75.3943		204	141.971	141.611		204	142.054	142.58
515	75.8473	75.3037		206	143.023	143.604		206	142.358	141.694
520	76.7986	76.5268		208	143.106	142.635		208	141.694	140.338
525	76.3003	75.9077		210	144.517	143.438		210	143.438	141.085
530	77.1157	76.0285		212	141.777	141.417		212	142.386	143.493
535	75.651	76.6023		214	142.164	142.524		214	145.348	145.763
540	76.5872	77.4177		216	141.611	141.196		216	145.182	147.258
545	74.5789	76.859		218	141.196	139.95		218	146.316	148.226
550	74.896	76.4211		220	140.67	140.282		220	146.51	147.977
555	75.5604	75.8926		222	141.168	142.331		222	148.725	147.977
560	76.2097	76.6929		224	141.694	142.137		224	147.368	147.839
565	74.6997	75.5		226	143.023	143.355		226	147.839	148.503
570	75.2433	76.2852		228	144.683	145.458		228	147.811	149.472
575	72.3139	72.3743		230	146.233	145.071		230	149.057	150.081
580	72.1478	72.3894		232	144.213	147.064		232	148.06	148.448
585	75.7114	74.1712		234	145.265	146.15		234	150.496	149.001
590	75.7869	76.1644		236	146.51	146.676		236	151.105	149.112
595	75.6359	76.0587		238	148.531	147.507		238	152.406	148.725
600	77.1761	77.6895		240	149.251	147.617		240	153.569	151.244
605	77.5989	76.6174		242	149.97	146.289		242	154.205	154.122
610	79.124	78.8522		244	149.389	148.891		244	157.499	155.285
615	77.1761	78.1878		246	150.081	150.247		246	156.946	156.171
620	77.8707	78.3086		248	149.306	150.552		248	157.555	157.305
625	77.9613	78.0368		250	150.081	149.693		250	158.136	158.08
630	79.2901	78.5049		252	148.891	149.583		252	157.665	159.188
635	80.1357	79.7582		254	149.998	150.275		254	158.689	157.388
640	80.9813	80.8907		256	150.33	149.583		256	157.721	158.385
645	80.5283	80.6491		258	150.33	150.69		258	159.575	160.073
650	77.9462	80.7699		260	152.157	151.908		260	160.24	160.129
655	80.0753	79.7431		262	152.019	152.185		262	162.62	159.326
660	80.6944	80.2112		264	153.735	152.711		264	162.786	160.793
665	78.2633	76.4815		266	154.537	154.15		266	162.343	161.43
670	78.369	77.5385		268	155.949	154.814		268	162.758	161.983
675	76.406	77.6442		270	155.589	155.589		270	164.668	164.834
680	77.4781	77.0553		272	156.032	157.527		272	164.364	165.969
685	76.8741	76.5419		274	156.254	156.475		274	166.025	167.326
690	75.802	76.4362		276	155.672	157.914		276	167.99	169.817
695	76.9496	76.3758		278	156.309	159.741		278	171.228	171.616
700	76.708	76.5872		280	156.558	158.191		280	173.775	172.474
705	76.859	76.859		282	157.804	157.831		282	175.353	175.74
710	76.1795	77.7348		284	157.444	156.724		284	177.456	177.789
715	76.0587	75.1678		286	156.254	156.392		286	178.37	179.671
720	75.1527	75.8624		288	156.724	157.056		288	179.449	179.007
725	74.2316	74.3524		290	158.468	158.025		290	179.505	178.591
730	75.8322	75.3641		292	157.638	157.859		292	180.916	181.747
735	74.745	75.6963		294	157.416	156.115		294	182.107	182.411
740	76.3003	76.7684		296	158.108	157.416		296	184.376	183.103
745	76.9647	77.3271		298	158.523	158.966		298	184.653	184.736
750	77.1912	78.0821		300	158.883	159.077		300	184.21	187.006
755	76.7231	77.8556		302	159.575	160.987		302	184.681	185.982
760	78.4445	77.4026		304	159.105	160.406		304	185.677	185.677
765	77.4781	77.8405		306	160.156	161.319		306	186.065	186.286
770	78.2331	78.3388		308	160.848	160.682		308	188.03	189.165
775	78.1123	77.5687		310	162.288	162.149		310	190.079	190.383
780	77.7952	77.5083		312	163.45	162.205		312	192.459	193.123
785	77.7952	77.5989		314	163.395	164.724		314	192.265	194.231
790	76.0436	76.1493		316	164.89	165.388		316	195.587	196.417
795	76.4966	76.1946		318	165.25	166.938		318	197.026	196.057
800	77.5234	77.1761		320	164.585	167.519		320	198.05	198.964
805	75.2886	76.1191		322	165.748	166.578		322	198.992	201.815
810	76.8892	76.7684		324	166.993	166.8		324	200.403	204.278
815	75.3339	75.6661		326	166.717	166.191		326	201.593	204.085
820	74.896	75.1225		328	167.658	166.551		328	204.915	204.223
825	73.8088	75.1376		330	168.599	167.713		330	205.164	205.912
830	74.4128	74.141		332	170.066	167.132		332	208.458	207.655
835	73.7786	74.3826		334	169.042	168.101		334	208.458	210.7
840	73.9598	74.9111		336	169.236	167.464		336	210.949	211.973
845	75.1678	75.1074		338	170.204	167.852		338	214.326	212.555
850	77.8556	76.5872		340	169.069	169.928		340	213.939	213.551
855	78.7616	79.5468		342	170.232	170.481		342	215.793	213.081
860	77.9764	78.973		344	173.249	170.703		344	216.651	215.212
865	79.9243	79.8941		346	172.612	174.107		346	219.253	218.229
870	81.0568	81.2078		348	173.609	174.495		348	218.755	218.229
875	81.1021	80.2414		350	175.131	176.294		350	218.893	219.558
880	79.8186	80.9209		352	174.688	176.349		352	221.468	221.772
885	80.6793	81.1172		354	175.713	176.211		354	222.686	224.983
890	80.9813	80.4075		356	178.148	177.927		356	227.391	226.588
895	79.7733	80.03		358	178.979	178.148		358	229.329	227.197
900	79.8488	78.2482		360	180.916	181.775		360	231.377	229.246
905	78.6559	78.4596		362	181.968	183.159		362	232.318	231.571
910	78.5804	78.6408		364	183.546	182.854		364	235.003	232.927
915	78.9277	79.5317		366	184.543	183.435		366	238.214	236.276
920	78.52	79.4562		368	186.729	185.345		368	239.847	241.065
925	78.9428	78.218		370	185.539	186.508		370	244.11	241.619
930	78.1123	77.9462		372	185.844	187.366		372	247.016	244.802
935	77.3875	78.4747		374	185.65	186.923		374	250.255	248.317
940	77.2214	76.3154		376	187.67	187.532		376	251.113	250.698
945	76.0436	76.859		378	187.532	189.442		378	253.881	253.217
950	77.0553	78.067		380	188.778	188.418		380	257.313	256.594
955	75.9983	76.1795		382	187.172	188.667		382	259.196	260.386
960	75.1376	75.8775		384	188.335	190.3		384	263.126	262.545
965	74.2467	75.1829		386	191.047	192.293		386	265.257	265.479
970	75.349	74.3675		388	193.511	193.151		388	267.444	266.475
975	75.2735	75.7114		390	195.532	193.788		390	269.686	268.33
980	77.1308	75.5906		392	197.331	195.255		392	271.402	272.316
985	75.0772	74.9866		394	198.936	197.386		394	274.42	276.606
990	76.0436	75.9077		396	201.012	200.652		396	277.16	278.572
995	76.708	76.9496		398	201.815	203.171		398	280.509	279.651
1000	75.9832	76.9798		400	203.78	203.669		400	283.831	282.751

## Sheet: 7B
Total conc (uM)	Free A4 (uM)	Free B4 (uM)
25	11.19	11.2
55	15.26	15.32
75	16.67	16.66
104	17.58	17.52
125	17.65	17.83
138	17.72	17.92
150	17.81	17.87
166	17.66	17.8

## Sheet: 7D
CMC = 16.7 uM			CMC = 17.85 uM			CMC = 18 uM
Cluster size	foTM		Cluster size	foTM		Cluster size	foTM
1	0.228332		1	0.0831522		1	0.0581855
2	0.277394		2	0.132201		2	0.0924325
3	0.14156		3	0.0711277		3	0.0493918
4	0.0971372		4	0.069837		4	0.0431873
5	0.0676209		5	0.0482337		5	0.0298012
6	0.0515301		6	0.0350543		6	0.0202257
7	0.0373149		7	0.0290082		7	0.0194929
8	0.0268509		8	0.0244565		8	0.0199326
9	0.017769		9	0.0238451		9	0.018467
10	0.00789733		10	0.0183424		10	0.0141678
11	0.00977295		11	0.0216712		11	0.013435
12	0.0023692		12	0.0179348		12	0.0105525
13	0.0076999		13	0.011481		13	0.00762128
14	0.0041461		14	0.0180707		14	0.00752357
15	0.00148075		15	0.0132473		15	0.00806097
16	0.0047384		16	0.0076087		16	0.00390835
17	0.00503455		17	0.0115489		17	0.00996629
18	0.0035538		18	0.00611413		18	0.00351751
23	0.00227048		19	0.00903533		19	0.00928233
28	0.00552813		20	0.00951087		20	0.00683961
			21	0.00570652		21	0.00307783
			22	0.00149457		22	0.00322439
			23	0.003125		23	0.0022473
			24	0.00652174		24	0.00234501
			25	0.00679348		25	0.00244272
			26	0.0141304		27	0.0039572
			27	0.00366848		28	0.00136792
			28	0.00380435		30	0.00146563
			29	0.00197011		31	0.00302897
			31	0.00210598		32	0.00156334
			32	0.00434783		34	0.00166105
			33	0.00224185		35	0.0017099
			36	0.00244565		36	0.00175876
			37	0.00251359		37	0.00180761
			41	0.00278533		39	0.00190532
			43	0.0029212		42	0.00205188
			45	0.00305707		43	0.00210074
			46	0.00625		44	0.00214959
			47	0.00319293		46	0.0022473
			49	0.0033288		48	0.00234501
			52	0.00353261		49	0.00478773
			54	0.00366848		50	0.00244272
			64	0.00434783		57	0.0027847
			76	0.00516304		60	0.00293126
			83	0.00563859		70	0.00341981
			87	0.00591033		79	0.00385949
			111	0.00754076		86	0.00420148
			118	0.0080163		110	0.00537398
			144	0.00978261		276	0.0134838
			275	0.0186821		385	0.0188089
			482	0.0327446		835	0.0407934
			487	0.0330842		1018	0.0497337
			590	0.0400815		1278	0.0624359
			1147	0.0779212		1612	0.0787532
						2193	0.107138
						2223	0.108603

## Sheet: 7F
	SP = 19 * 17.37				SP = 20 * 16.5
Time (ms)	Total A4 (uM)	Total B4 (uM)		Time (ms)	Total A4 (uM)	Total B4 (uM)
0	1.384	1.384		0	1.384	1.384
2.00001	19.9019	18.4072		2.00001	22.1163	17.9643
4.00001	30.448	27.7907		4.00001	31.3338	27.1264
6.00001	38.4198	36.2608		6.00001	40.3851	36.8421
8.00001	45.4782	42.3781		8.00001	46.9453	41.7691
10	49.4918	48.6338		10	50.9035	48.7722
12	55.969	53.3394		12	56.9101	52.1214
14	61.588	57.4914		14	61.9478	58.4048
16	64.1622	62.0586		16	67.0686	62.6122
18	68.1205	65.2694		18	72.8538	68.425
20	71.276	68.9786		20	75.7325	69.892
22	75.0682	70.9715		22	81.047	73.4627
24	77.8085	75.6494		24	84.4517	78.9157
26	80.2997	76.203		26	87.884	82.1819
28	82.9293	79.3862		28	90.6243	85.6973
30	85.8634	83.0677		30	92.8664	87.7179
32	87.4134	84.7008		32	94.8317	89.6832
34	89.268	86.4723		34	97.1014	92.036
36	89.7662	87.1643		36	97.7104	91.8976
38	94.887	90.735		38	98.4024	93.1986
40	96.5202	93.6138		40	99.9802	93.4754
42	98.7899	94.721		42	100.451	95.3299
44	98.4301	95.6898		44	102.001	98.0426
46	99.4266	97.7104		46	103.357	97.3229
48	99.648	99.9525		48	104.852	99.0114
50	102.222	100.728		50	105.129	99.1498
52	105.488	103.772		52	107.26	101.364
54	108.644	105.378		54	106.319	104.271
56	110.526	107.537		56	109.917	106.042
58	111.578	109.834		58	112.464	106.817
60	112.492	111.274		60	113.35	105.101
62	115.315	113.433		62	112.879	108.533
64	118.72	113.543		64	116.118	111.44
66	116.505	115.37		66	118.803	113.239
68	119.993	116.616		68	119.19	114.152
70	121.709	118.028		70	120.408	114.568
72	123.84	120.629		72	122.844	118.249
74	125.252	120.297		74	124.532	116.92
76	124.532	121.598		76	124.422	117.252
78	124.56	123.647		78	125.999	117.778
80	125.75	124.062		80	124.283	117.889
82	126.691	124.062		82	124.006	119.356
84	127.466	125.833		84	127.826	121.46
86	127.605	125.501		86	126.719	121.072
88	129.902	125.889		88	128.324	122.899
90	130.899	127.328		90	128.684	122.761
92	131.812	128.463		92	130.096	125.806
94	130.926	128.684		94	131.314	126.747
96	130.843	129.293		96	133.805	127.799
98	133.556	130.041		98	134.552	130.511
100	134.802	131.092		100	135.355	129.958
102	137.265	133.833		102	135.466	131.48
104	137.237	134.968		104	138.926	132.034
106	137.68	135.577		106	139.895	134.829
108	139.646	137.625		108	138.954	133.252
110	142.386	139.203		110	141.03	134.165
112	142.22	140.891		112	140.67	134.359
114	144.462	141.528		114	144.157	135.992
116	143.798	142.054		116	146.178	139.507
118	146.261	143.964		118	145.403	139.922
120	146.621	144.379		120	147.534	141.306
122	144.905	144.296		122	148.559	141.362
124	147.368	144.517		124	147.036	139.922
126	148.116	144.24		126	148.78	140.697
128	148.309	147.175		128	147.673	140.836
130	149.86	147.728		130	148.033	141.998
132	152.378	148.697		132	148.697	141.805
134	154.925	151.133		134	148.143	143.576
136	156.115	150.884		136	147.867	142.967
138	156.475	152.212		138	151.327	145.265
140	155.119	151.188		140	151.714	146.759
142	154.676	150.33		142	153.818	147.867
144	156.337	152.129		144	153.845	148.254
146	159.049	155.036		146	156.143	149.86
148	158.662	156.004		148	157.693	149.721
150	159.603	157.97		150	159.658	150.302
152	160.959	158.856		152	158.772	152.849
154	162.177	158.496		154	159.022	153.292
156	162.371	159.686		156	160.35	153.458
158	162.814	159.271		158	160.156	153.098
160	163.146	160.959		160	159.88	155.036
162	166.274	161.679		162	160.378	154.897
164	165.526	162.703		164	161.347	155.063
166	165.305	165.084		166	161.707	153.679
168	165.803	165.194		168	163.672	154.704
170	168.488	165.582		170	162.869	157.97
172	170.37	165.277		172	162.232	156.946
174	169.568	167.27		174	164.724	158.08
176	171.616	167.326		176	165.831	161.042
178	171.837	167.796		178	168.156	161.679
180	174.052	169.069		180	169.263	162.703
182	173.166	169.125		182	172.17	163.893
184	173.36	170.703		184	172.889	164.641
186	173.969	170.786		186	175.27	166.08
188	173	172.696		188	175.879	168.959
190	173.83	171.699		190	176.183	170.232
192	173.194	171.948		192	178.342	171.45
194	174.107	170.509		194	180.501	172.28
196	176.543	172.723		196	180.557	172.945
198	177.567	173.138		198	179.865	173.36
200	176.045	174.384		200	180.169	173.637
202	178.093	175.104		202	182.965	174.855
204	178.647	176.1		204	184.21	175.353
206	178.564	176.82		206	184.321	174.799
208	181.415	176.515		208	183.878	177.014
210	182.522	179.422		210	185.622	177.872
212	183.878	179.837		212	185.982	179.809
214	184.376	181.941		214	189.359	182.024
216	184.57	181.941		216	189.857	183.518
218	183.851	180.972		218	192.874	184.155
220	186.646	182.66		220	194.369	187.255
222	188.528	183.878		222	196.03	186.951
224	187.421	182.356		224	194.618	189.027
226	188.944	186.591		226	197.746	189.027
228	189.137	186.01		228	198.161	188.695
230	188.944	187.698		230	198.687	190.051
232	191.269	190.328		232	200.043	191.407
234	193.372	188.335		234	200.514	192.708
236	194.784	190.909		236	200.292	193.4
238	196.224	192.348		238	200.126	195.559
240	199.6	195.393		240	201.76	195.642
242	200.597	196.085		242	205.579	196.03
244	201.483	198.77		244	206.52	196.749
246	204.5	200.929		246	208.652	197.109
248	207.074	202.977		248	208.098	198.715
250	209.897	205.69		250	214.797	201.843
252	212.748	207.904		252	213.579	204.085
254	213.883	209.51		254	214.437	206.52
256	213.108	211.448		256	215.987	206.52
258	215.959	213.081		258	217.371	209.316
260	218.7	214.769		260	219.004	210.756
262	221.246	217.343		262	220.167	211.78
264	224.54	217.316		264	220.831	214.077
266	223.295	219.558		266	223.82	216.651
268	224.789	222.713		268	225.758	215.71
270	226.588	221.828		270	227.28	216.956
272	227.917	226.229		272	227.28	220.72
274	230.464	228.249		274	230.436	221.994
276	231.349	229.412		276	230.934	224.097
278	231.958	230.851		278	233.508	224.512
280	233.315	231.848		280	235.917	226.782
282	234.671	233.01		282	238.297	228.858
284	236.858	234.173		284	238.352	229.301
286	239.155	235.972		286	238.629	230.574
288	240.373	239.958		288	240.179	231.682
290	244.968	240.512		290	243.307	233.259
292	247.459	244.414		292	244.802	236.526
294	250.504	243.584		294	246.684	237.494
296	252.552	248.29		296	248.594	239.986
298	256.787	250.366		298	250.338	242.754
300	258.116	252.829		300	253.189	244.082

## Sheet: 7E
	SP = 17.5 * 16				SP = 18.66 * 15
Time (ms)	Total A4 (uM)	Total B4 (uM)		Time (ms)	Total A4 (uM)	Total B4 (uM)
0	1.384	1.384		0	1.384	1.384
5.00001	32.6901	30.6418		5.00001	33.908	29.2825
10	45.6166	44.8416		10	44.9436	41.0101
15	55.9413	53.9483		15	55.2872	49.7147
20	59.7888	58.2941		20	58.6015	55.5057
25	64.273	61.2282		25	64.356	59.9855
30	67.816	65.9891		30	69.4185	63.2634
35	70.8054	69.2		35	71.3124	66.4684
40	74.1547	72.3832		40	73.9712	70.6204
45	74.6253	72.577		45	76.812	73.6798
50	75.4557	71.6912		50	79.7985	74.1533
55	75.7325	75.0128		55	78.4145	75.9015
60	79.0264	76.5629		60	79.2158	77.1398
65	78.7773	78.4174		65	81.8381	75.4644
70	82.0158	78.6666		70	83.6956	77.2126
75	82.4034	80.1336		75	83.7684	79.3979
80	84.9222	83.3998		80	87.192	82.2752
85	85.0053	83.123		85	87.7747	81.5467
90	89.3787	85.0053		90	86.9371	82.3844
95	90.1814	87.7179		95	88.1389	83.4042
100	87.5518	87.4965		100	90.5063	84.6061
105	89.7939	87.884		105	89.3044	84.7518
110	87.3304	86.6384		110	89.268	83.2221
115	85.5035	82.6525		115	86.5728	81.7653
120	85.2821	83.732		120	85.9901	80.0535
125	87.0536	86.0571		125	89.0131	81.8381
130	89.2957	86.417		130	90.6884	84.2419
135	87.7733	85.5866		135	90.5063	83.2585
140	87.7733	84.9222		140	88.1025	82.7851
145	89.2403	86.0571		145	88.7945	83.9141
150	87.9947	85.3098		150	86.5	82.9307
155	87.3581	83.3168		155	87.2648	82.2023
160	85.4205	83.8704		160	87.1556	81.656
165	86.583	85.5866		165	88.9402	83.9141
170	85.4482	82.2096		170	88.7217	84.5333
175	85.9741	82.9016		175	87.7019	82.4573
180	86.9429	84.9776		180	88.1025	82.7122
185	87.9394	84.7008		185	90.5427	81.3646
190	89.8493	87.5242		190	90.3971	82.9672
195	89.5725	87.109		195	91.5261	84.7882
200	90.9842	85.891		200	89.2316	85.5166
205	89.5448	87.2474		205	91.7082	84.7882
210	86.8322	87.109		210	91.8903	85.9173
215	88.1054	87.3858		215	93.9299	85.6259
220	89.8493	87.3027		220	94.7676	88.6488
225	90.735	88.9912		225	93.5657	86.9735
230	92.9494	90.9011		230	92.9101	85.808
235	91.9253	89.4618		235	92.1088	85.0432
240	94.4995	90.3198		240	86.5728	82.0931
245	92.4235	90.3752		245	86.5	80.7091
250	92.6173	90.8181		250	87.2648	82.4937
255	94.029	91.261		255	88.5032	84.6425
260	93.8075	92.3405		260	88.0297	83.5863
265	93.6968	89.3787		265	87.9204	82.1659
270	89.7109	88.4376		270	88.7945	82.6394
275	89.6278	88.1608		275	89.3773	83.4771
280	87.6072	87.4965		280	88.6853	81.5832
285	89.1573	85.6973		285	89.7779	84.0598
290	89.0189	86.7214		290	92.2909	85.8444
295	88.7144	86.9152		295	91.0891	85.5166
300	89.8493	87.0813		300	89.3408	85.8444
305	89.5725	87.7456		305	89.1223	85.2253
310	89.268	86.1678		310	92.1088	86.3907
315	88.2162	86.6384		315	92.4731	87.3013
320	91.0949	90.2368		320	93.6749	86.7914
325	89.0466	87.1643		325	94.7312	88.1754
330	91.8699	88.2992		330	93.4928	87.7383
335	89.2403	89.4064		335	90.7248	87.3013
340	90.8734	90.2922		340	93.2743	88.1025
345	91.8699	89.9046		345	89.1223	84.9703
350	89.3234	88.4376		350	90.1057	85.8444
355	91.5101	88.8528		355	87.8112	84.8611
360	92.4235	91.344		360	91.0891	86.2815
365	93.8352	91.1226		365	90.3606	85.3709
370	90.0707	89.4064		370	92.0724	85.4802
375	92.2298	89.3787		375	89.1587	84.9703
380	91.5931	90.3752		380	89.6686	84.0962
385	92.7557	90.2368		385	90.7977	84.2419
390	92.645	88.7974		390	88.9038	82.8215
395	90.8458	89.8493		395	89.7051	85.3709
400	91.6762	87.6902		400	89.96	83.9141
405	93.3093	90.5136		405	91.0526	84.9339
410	89.4064	89.9877		410	88.3939	83.1857
415	89.5725	88.2992		415	86.7914	83.4771
420	88.1885	85.6142		420	86.5364	82.6394
425	87.9394	85.4482		425	89.2316	85.0067
430	88.9635	87.275		430	93.2379	84.6789
435	89.8493	87.6902		435	92.8737	87.7383
440	86.8875	85.4205		440	92.3638	87.5926
445	86.9429	84.9222		445	91.1619	86.3179
450	87.2197	84.7008		450	91.0891	84.7882
455	87.7456	85.8634		455	90.6156	82.8579
460	88.493	86.583		460	88.8309	84.8246
465	89.7109	87.1366		465	88.8674	83.8413
470	89.5725	87.109		470	88.7217	83.7684
475	92.4512	87.7456		475	88.2846	81.9474
480	92.0083	88.9358		480	89.1223	84.4968
485	91.7315	89.2403		485	88.7945	81.8017
490	92.4789	89.9877		490	85.9537	80.4541
495	90.5966	90.1814		495	86.8642	83.0764
500	90.4306	89.1573		500	87.5562	80.3813
505	91.6485	90.2091		505	87.3377	81.0733
510	92.811	90.5136		510	85.6259	81.2554
515	93.0602	90.9565		515	85.9173	81.2189
520	92.3405	91.0395		520	84.9703	78.7787
525	94.1397	90.1261		525	86.0994	80.3448
530	94.3888	90.2645		530	85.7716	80.8547
535	92.5619	87.9394		535	85.808	78.888
540	93.9459	89.6832		540	85.9901	80.1627
545	91.7869	88.4099		545	86.4272	82.0931
550	91.344	88.7421		550	86.6093	81.3282
555	90.652	87.4134		555	86.6821	81.656
560	92.2851	89.6555		560	88.7217	85.5166
565	89.8493	88.7421		565	87.7747	83.9869
570	89.0742	86.6661		570	89.0131	84.9703
575	87.9947	87.192		575	93.2743	86.2086
580	90.0984	88.7144		580	93.3836	90.2149
585	90.1261	86.2232		585	93.9663	89.1587
590	88.8805	87.2474		590	91.0891	88.7217
595	87.7733	86.8598		595	94.6947	87.2284
600	87.7179	86.6661		600	94.8404	88.8309
605	88.2992	85.8357		605	94.2577	88.8674
610	87.9394	85.1437		610	93.3107	86.4272
615	89.2403	87.6072		615	94.5491	89.3773
620	90.7074	87.2197		620	94.8768	89.9964
625	89.3234	88.1608		625	92.8737	87.4834
630	90.4306	89.0466		630	93.8206	86.1722
635	88.6314	85.199		635	92.9829	90.3606
640	88.7698	84.0365		640	92.728	85.1888
645	91.0949	86.9429		645	90.6884	85.7716
650	93.8075	91.344		650	92.6916	86.1358
655	92.5342	91.2056		655	91.7446	86.7185
660	94.5826	92.9494		660	92.0724	86.5728
665	94.2504	91.2056		665	90.9798	88.9402
670	93.1986	91.2333		670	92.4366	86.1722
675	92.9218	90.9288		675	90.9434	86.7185
680	91.953	88.0501		680	91.5625	84.6425
685	91.1226	88.3822		685	88.2118	83.04
690	91.2333	90.1814		690	89.6686	84.4968
695	91.3717	88.3269		695	87.5562	82.6394
700	92.645	88.6867		700	87.8112	81.656
705	90.569	89.4341		705	87.5198	81.8381
710	92.8941	91.5931		710	88.1754	84.3876
715	94.4442	91.7592		715	89.1223	82.8215
720	92.7003	88.659		720	90.5427	85.3345
725	90.8458	90.7627		725	93.2743	88.4303
730	90.7627	88.7698		730	94.3669	88.0661
735	90.9565	88.6037		735	93.8935	88.0661
740	90.569	88.9358		740	91.9632	86.7549
745	88.3822	87.6349		745	92.8373	86.2086
750	89.5448	87.0813		750	91.8175	87.4469
755	88.1608	86.7214		755	90.7248	86.0629
760	90.0984	87.6902		760	89.1223	85.9173
765	90.0984	87.8286		765	89.6322	84.7882
770	88.1608	86.5277		770	88.6853	83.4042
775	89.96	85.6142		775	87.5198	82.2387
780	90.4029	87.3858		780	88.3211	82.4573
785	89.1573	86.0294		785	92.6187	85.2253
790	87.967	85.6696		790	90.4335	85.2253
795	89.877	86.1125		795	90.652	84.7154
800	87.4688	85.1437		800	90.7248	84.3876
